# Supplementary material for: Sequencing of Supernumerary Chromosomes of Red Fox and Raccoon Dog Confirms a Non-Random Gene Acquisition by B Chromosomes
Source: MDPI journal article supplement (doi:10.3390/genes9080405), 2018-08-10

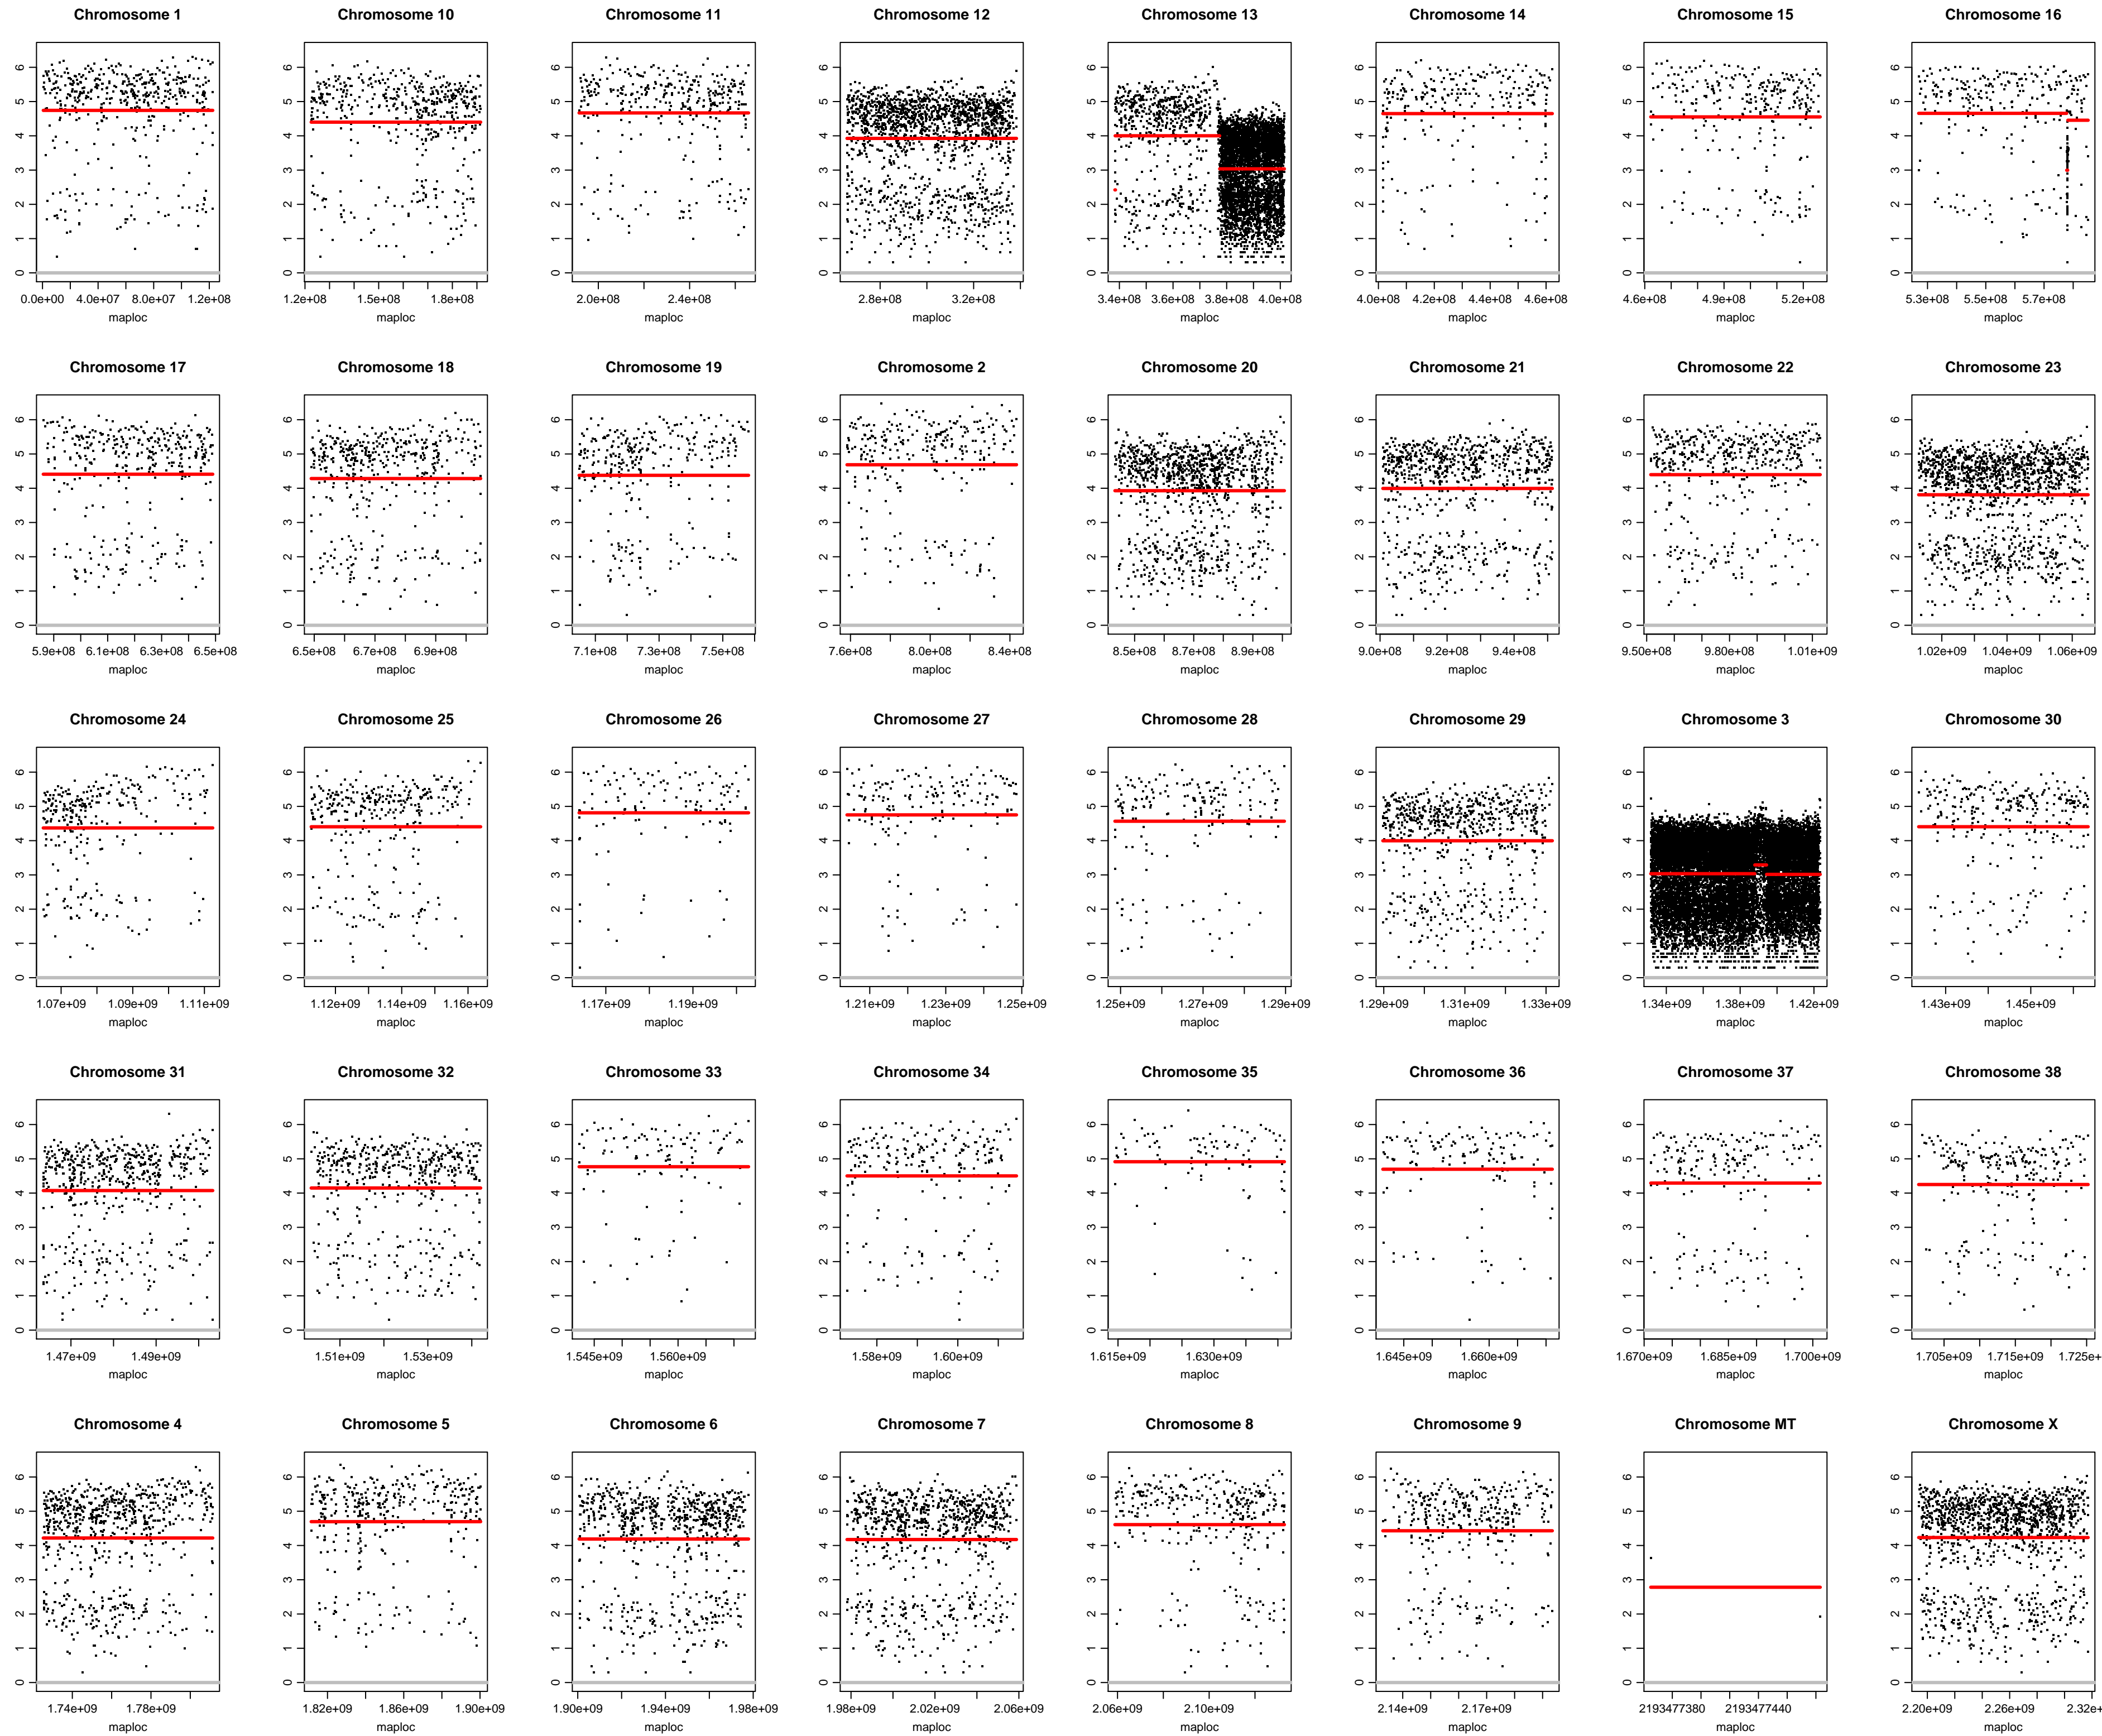

VVU3.CanFam3

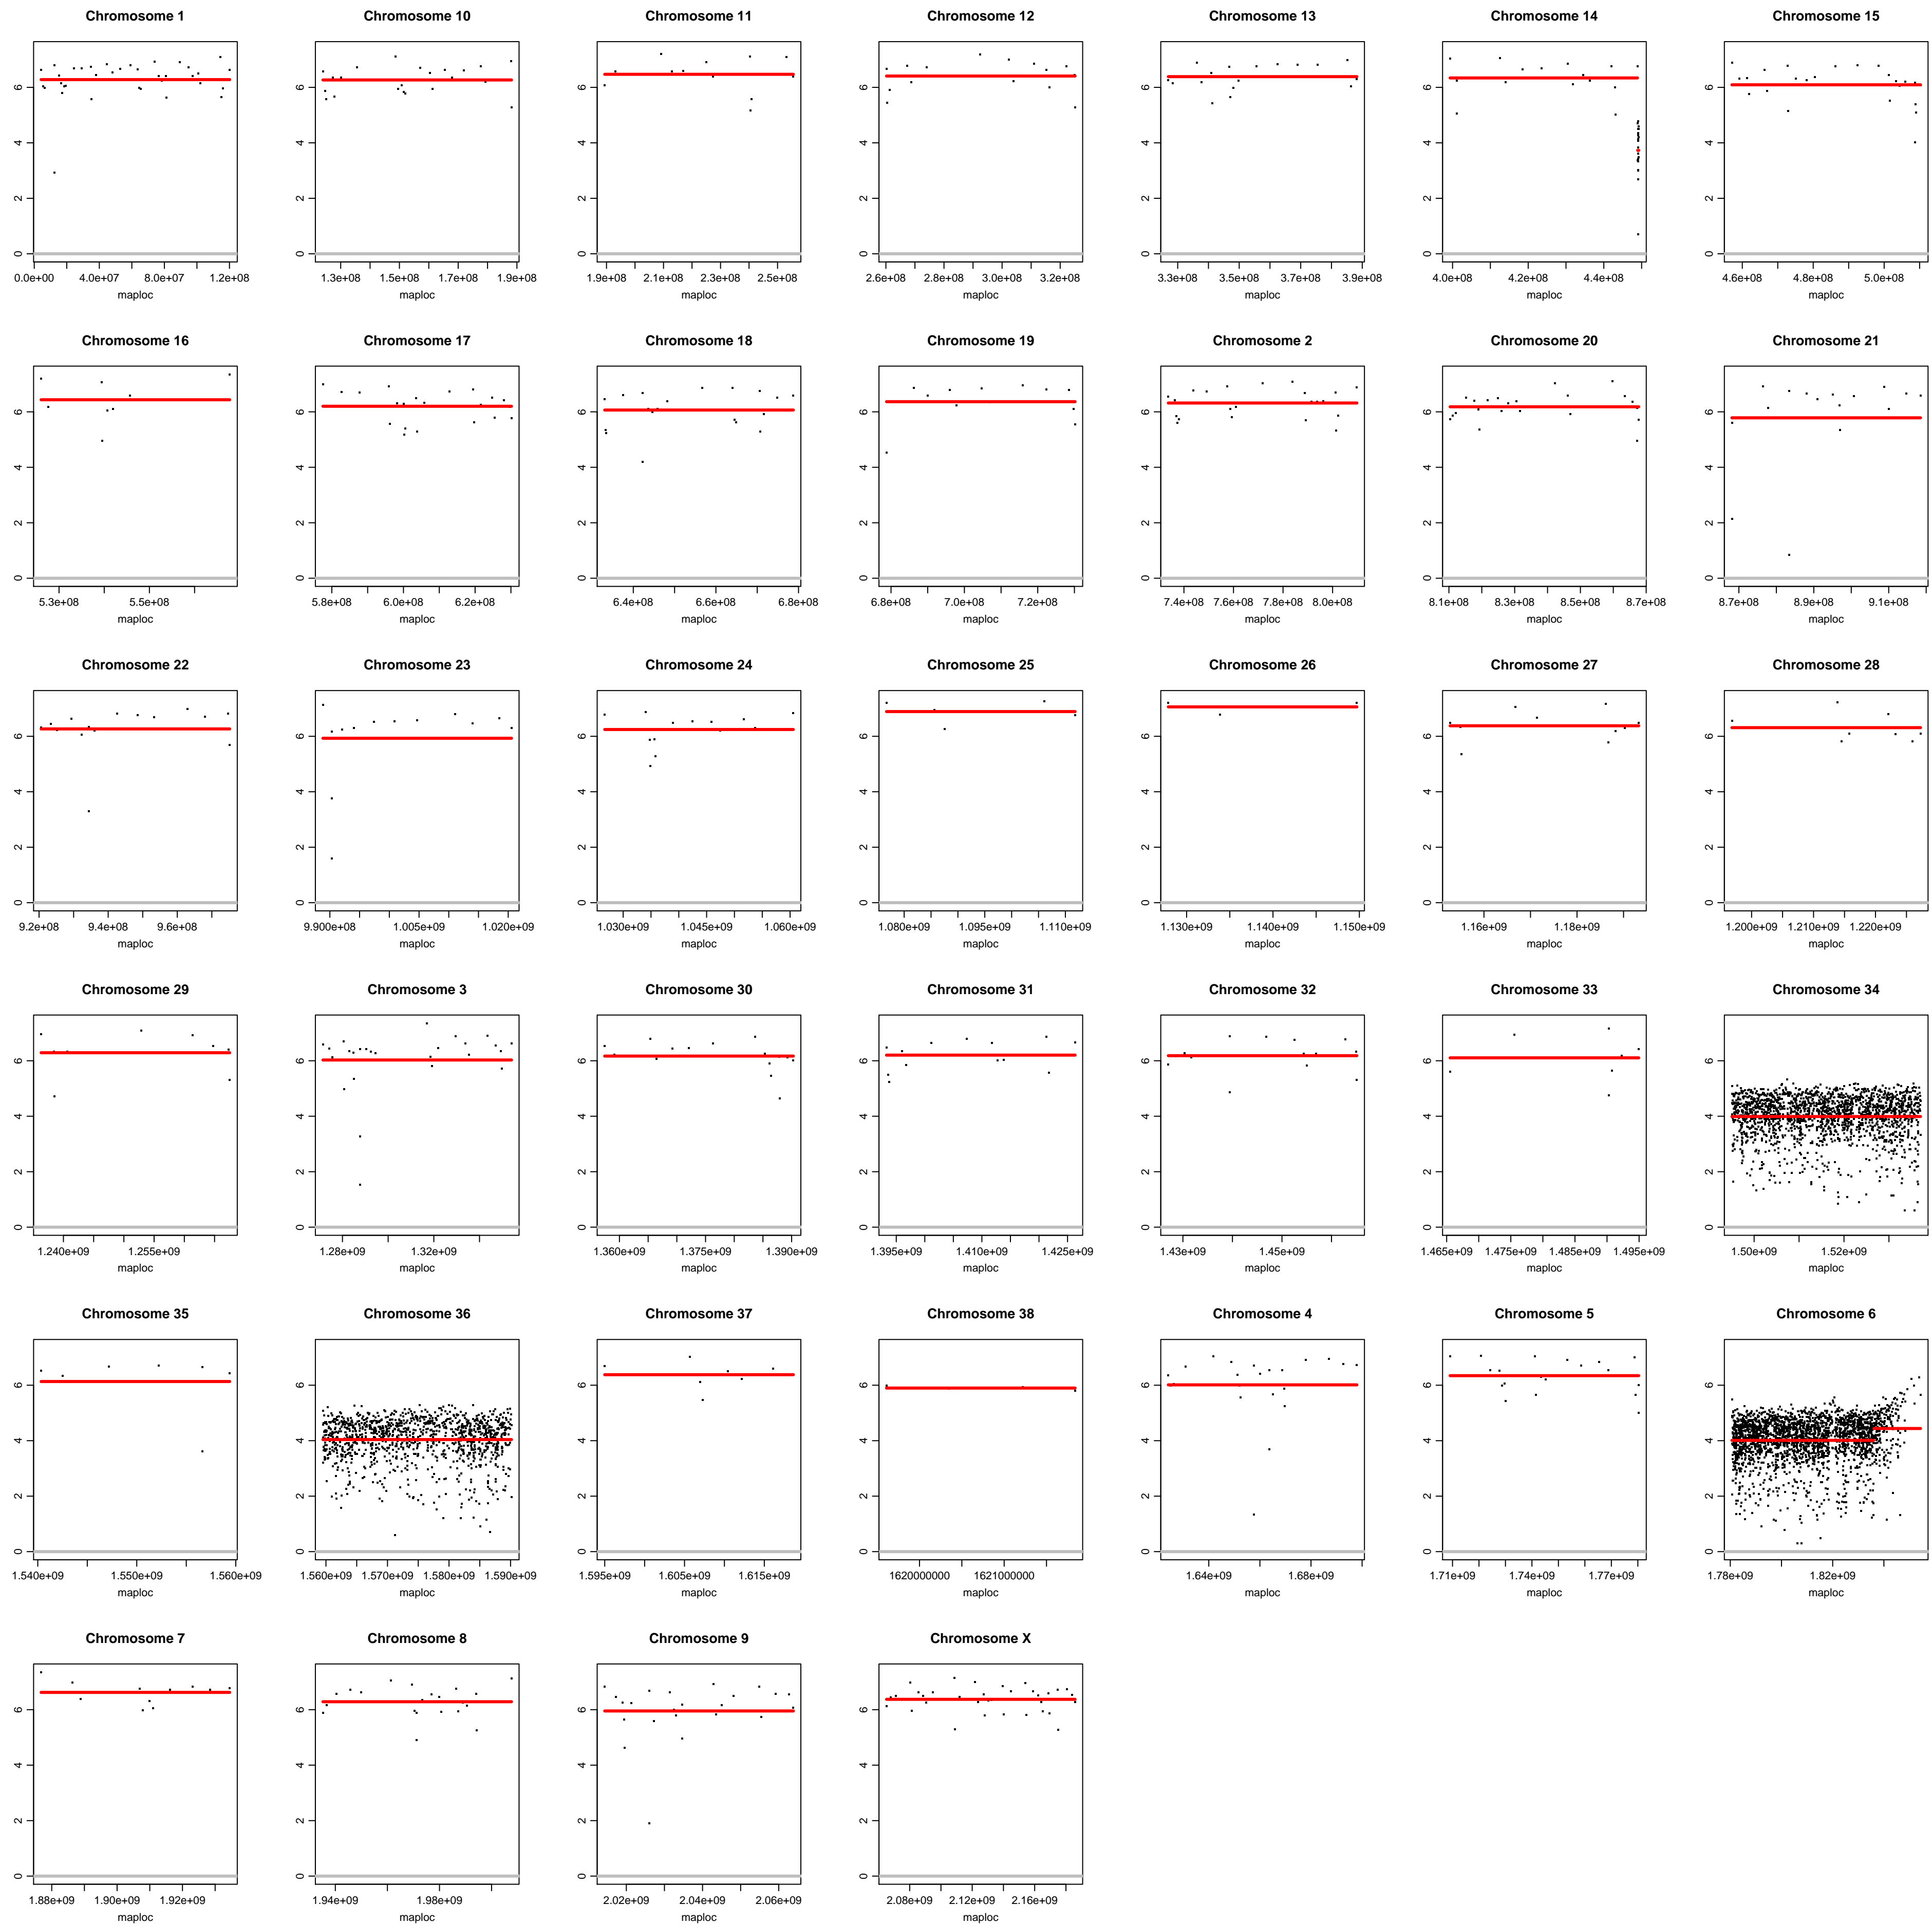

VVUB2.CanFam3

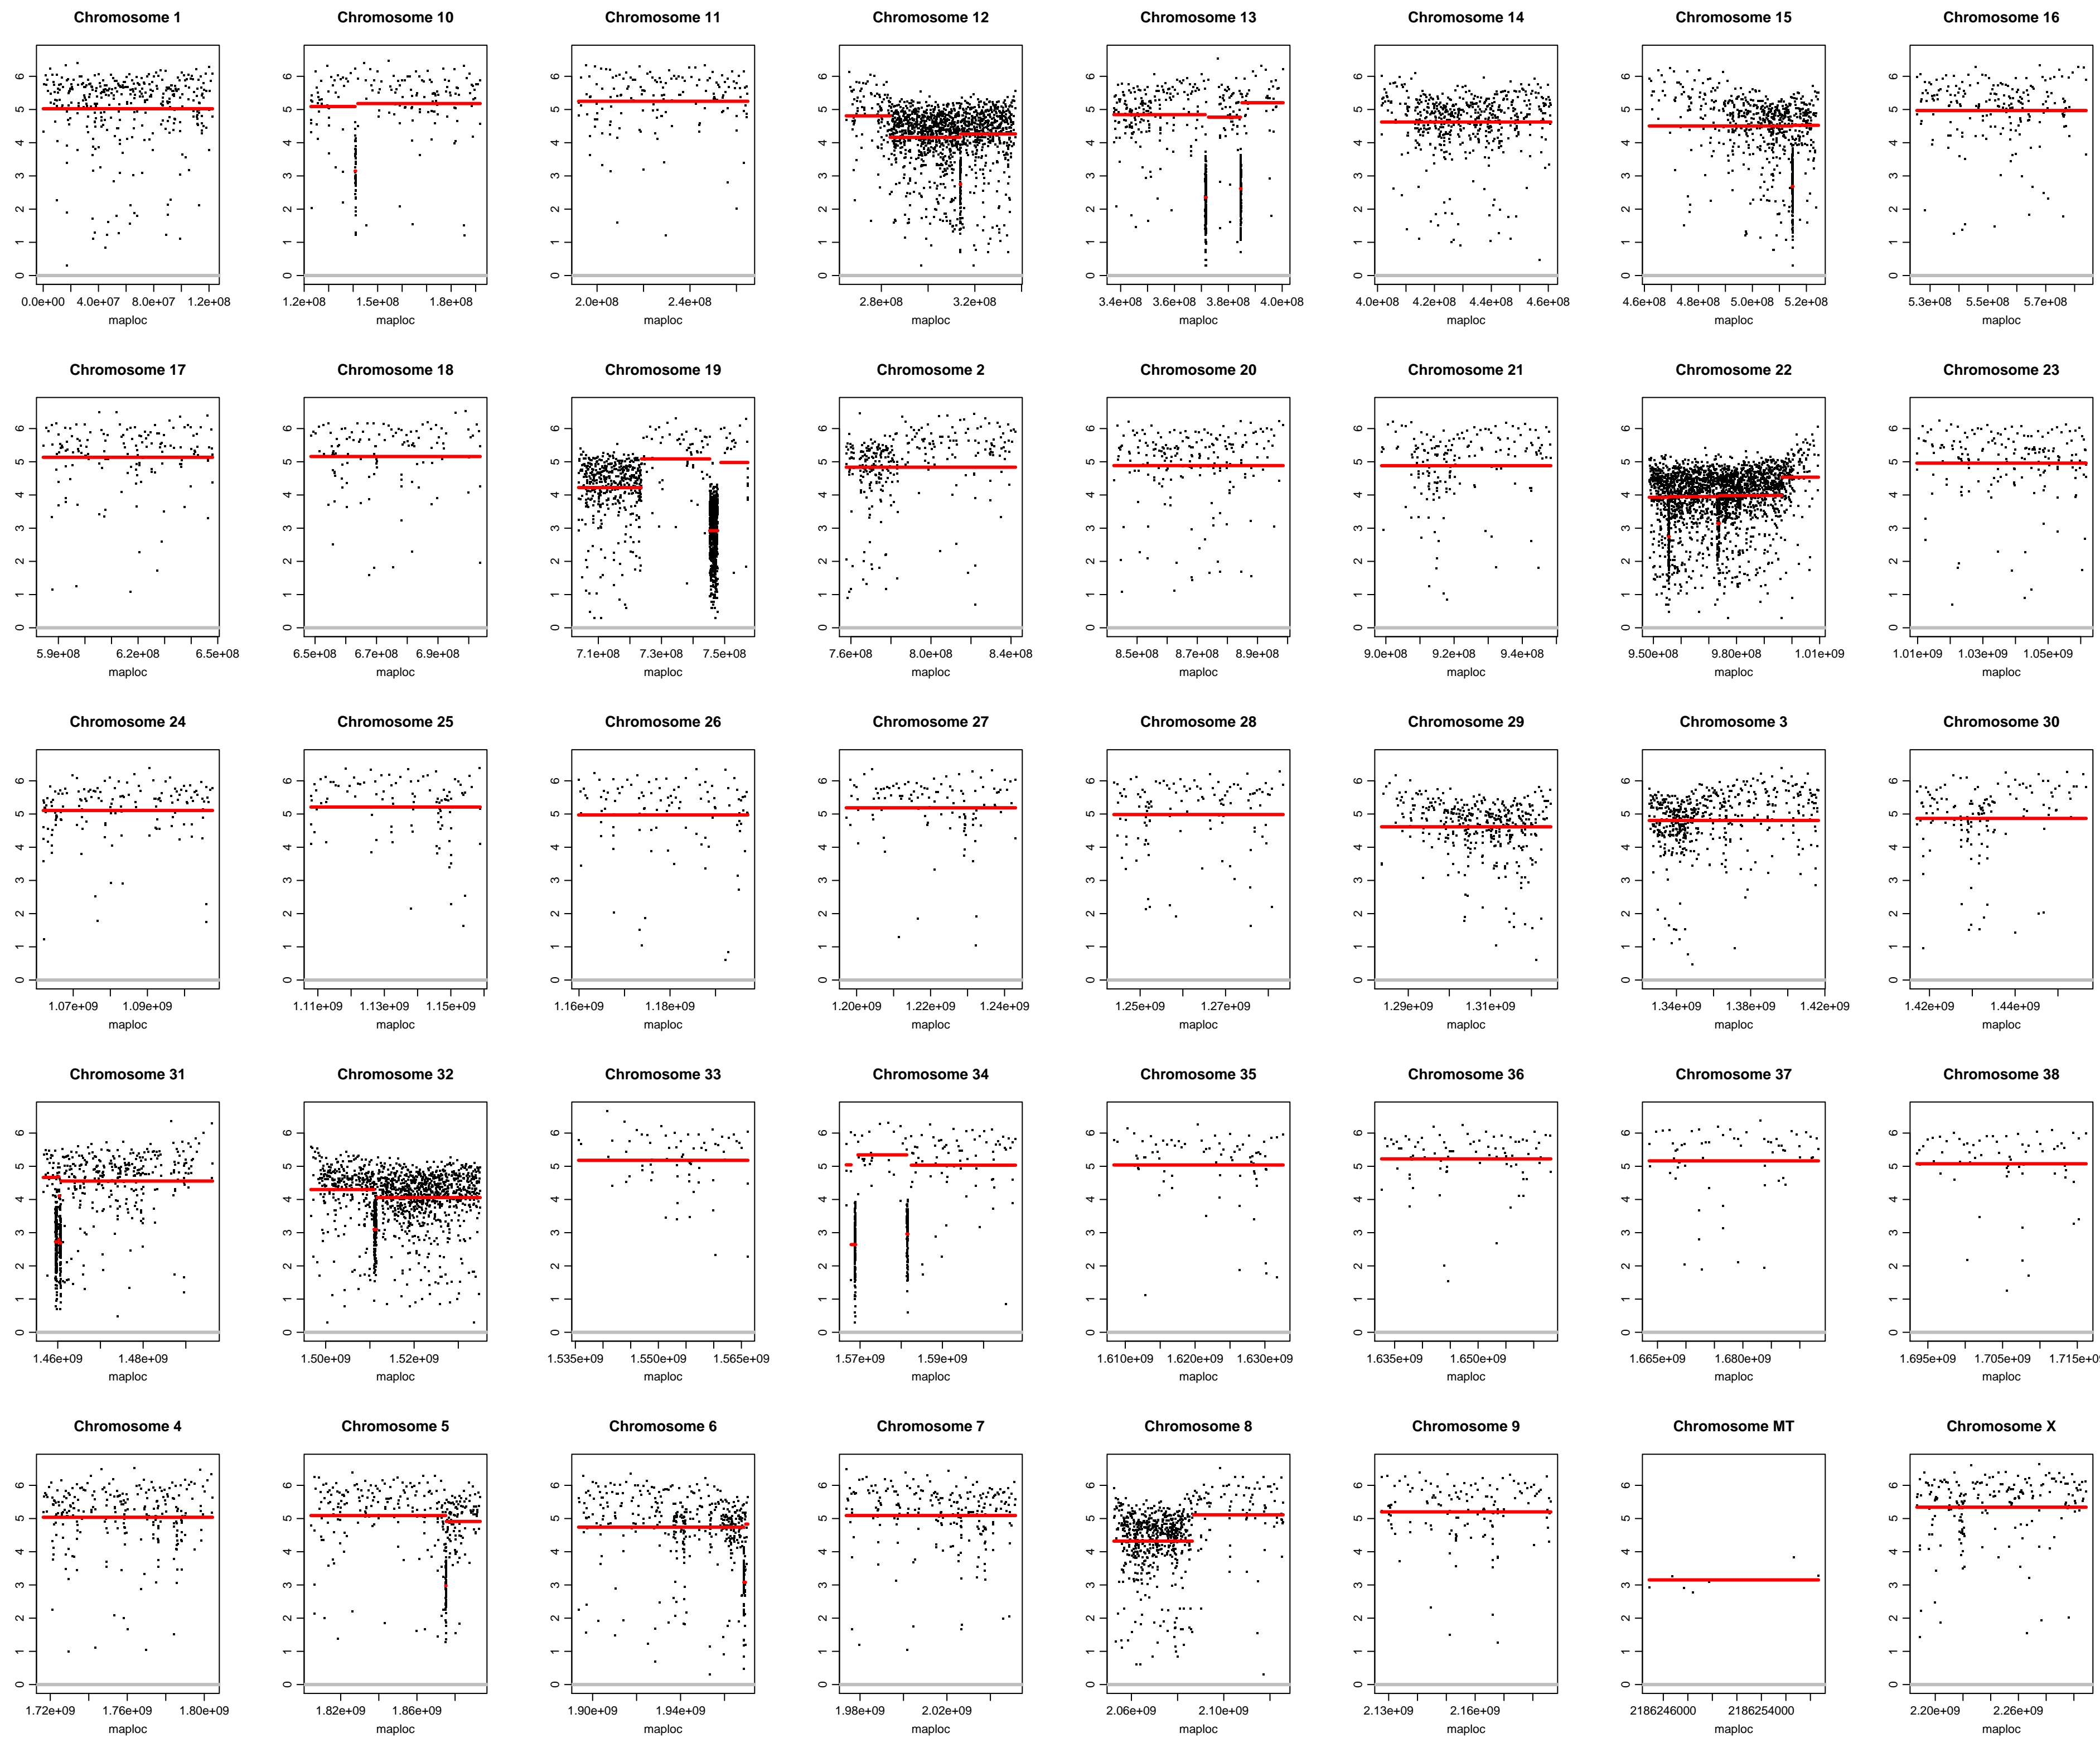

# VVUB3.CanFam3

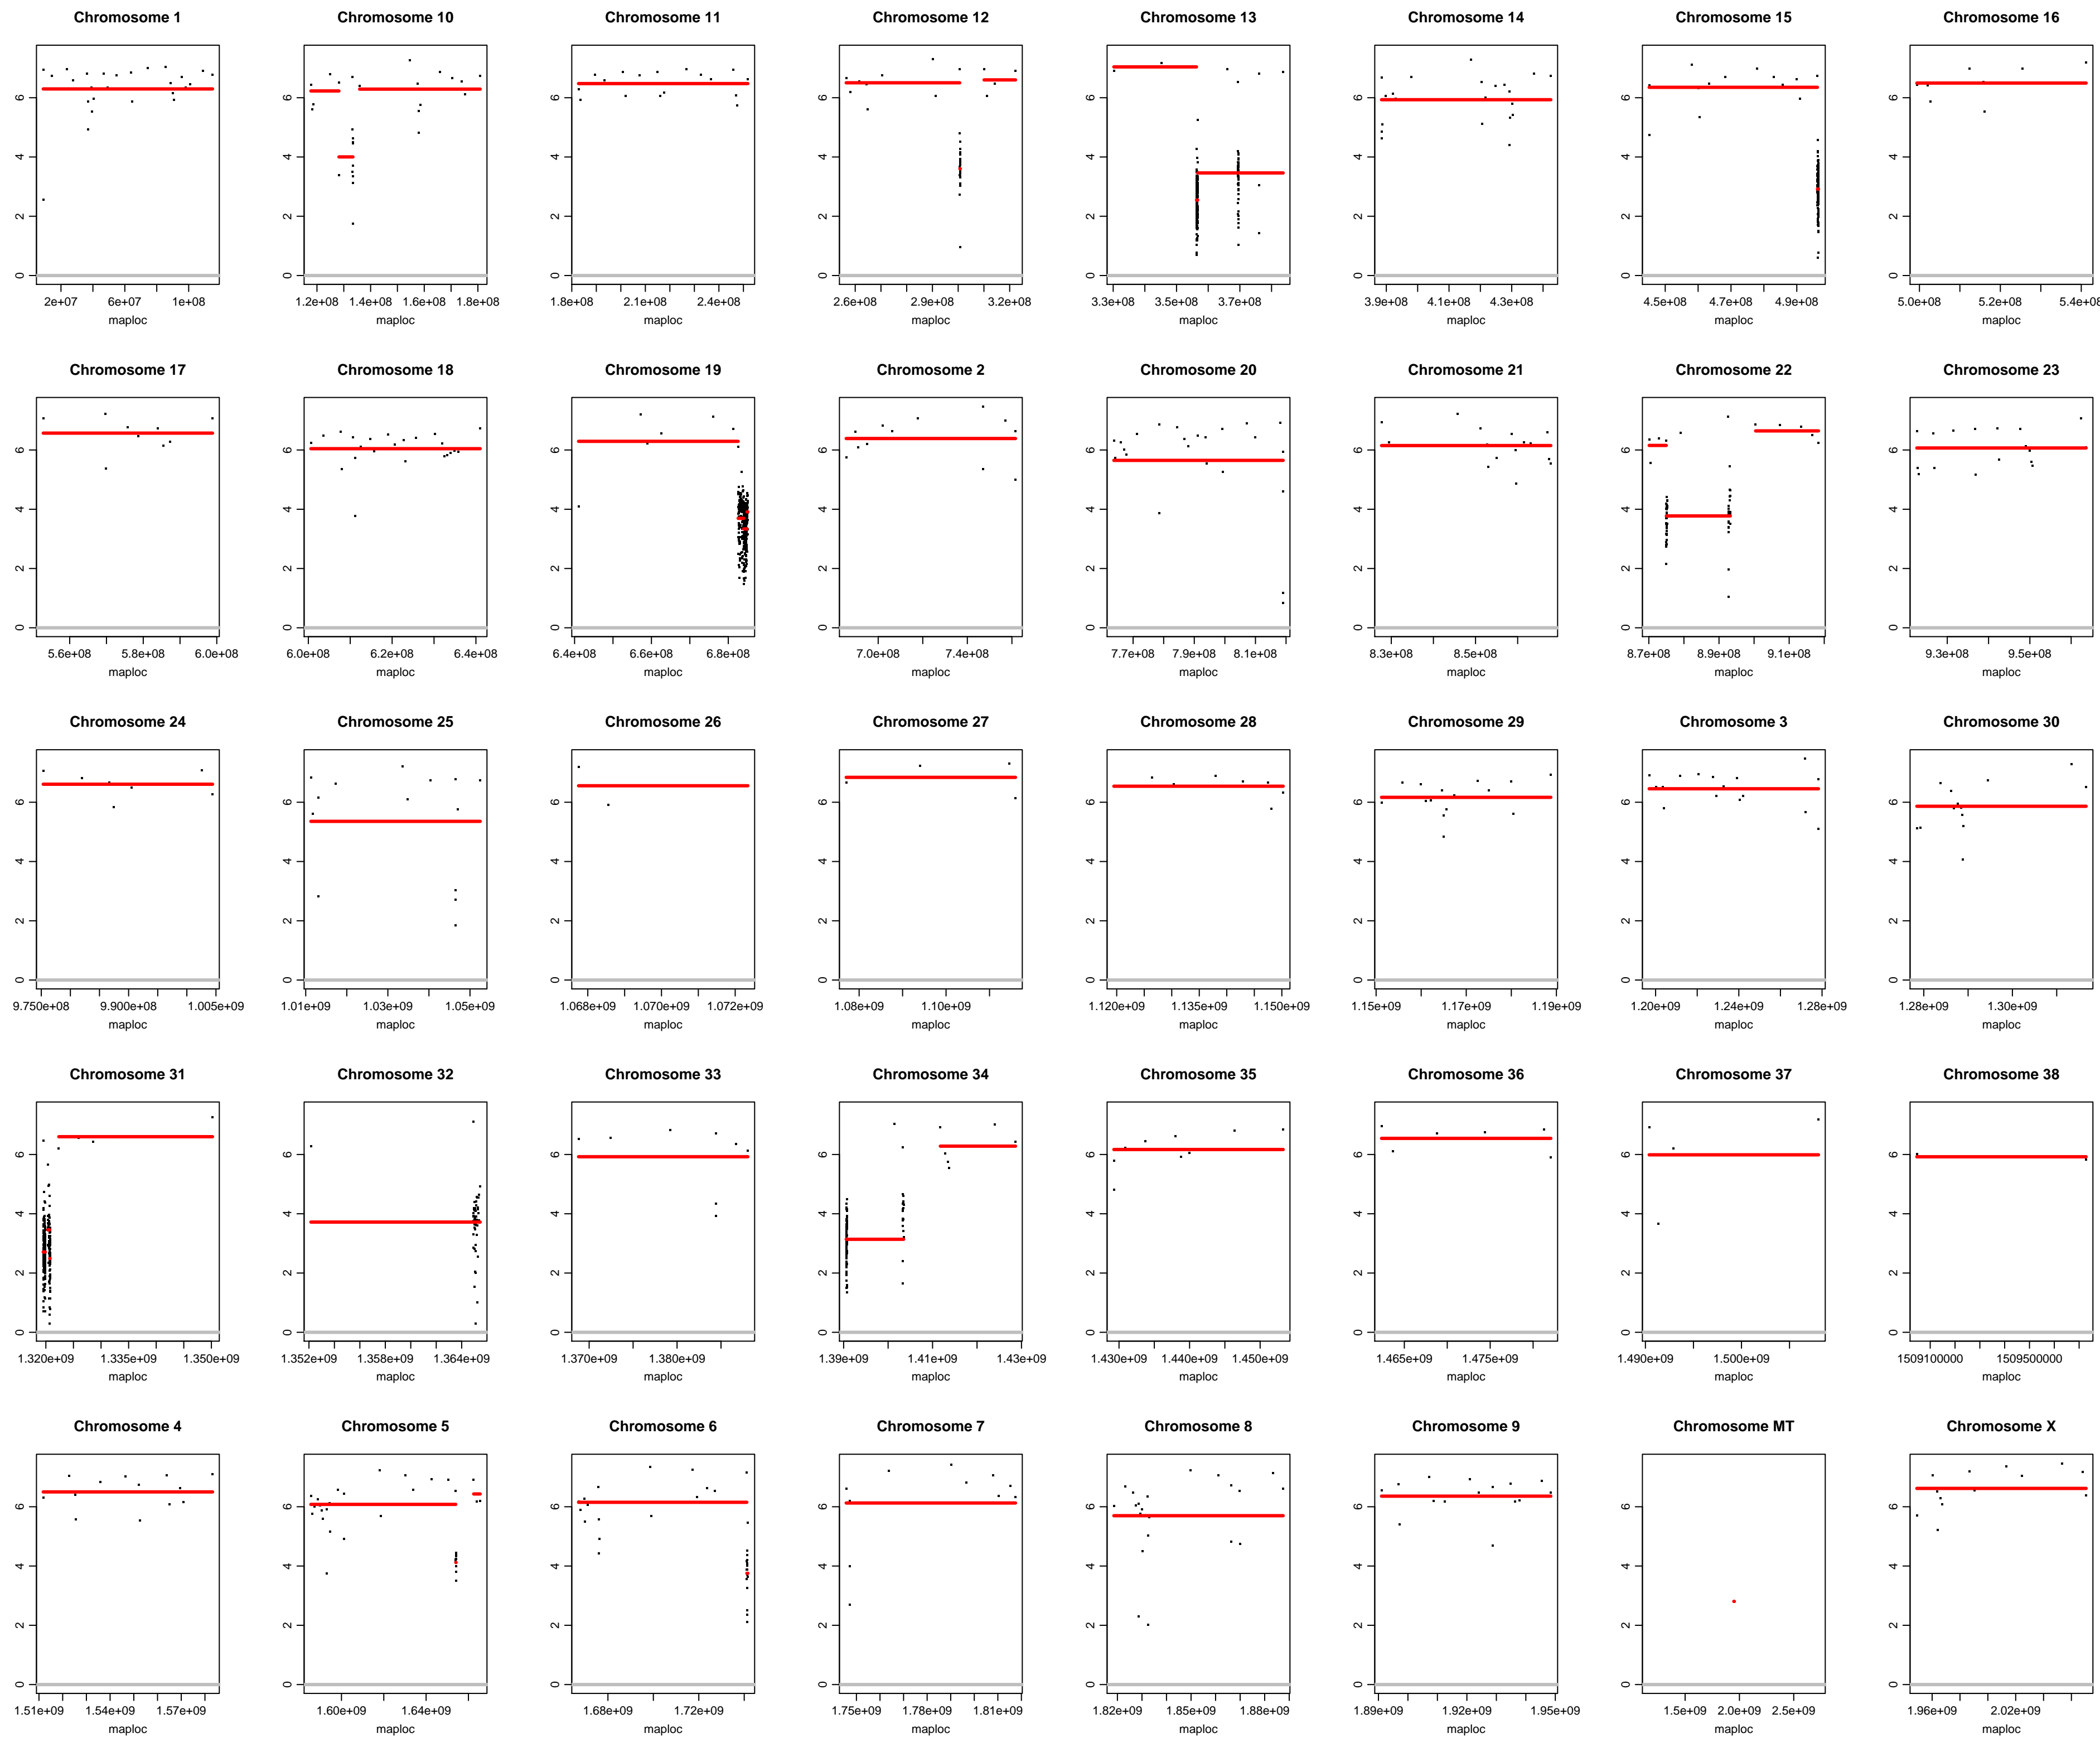

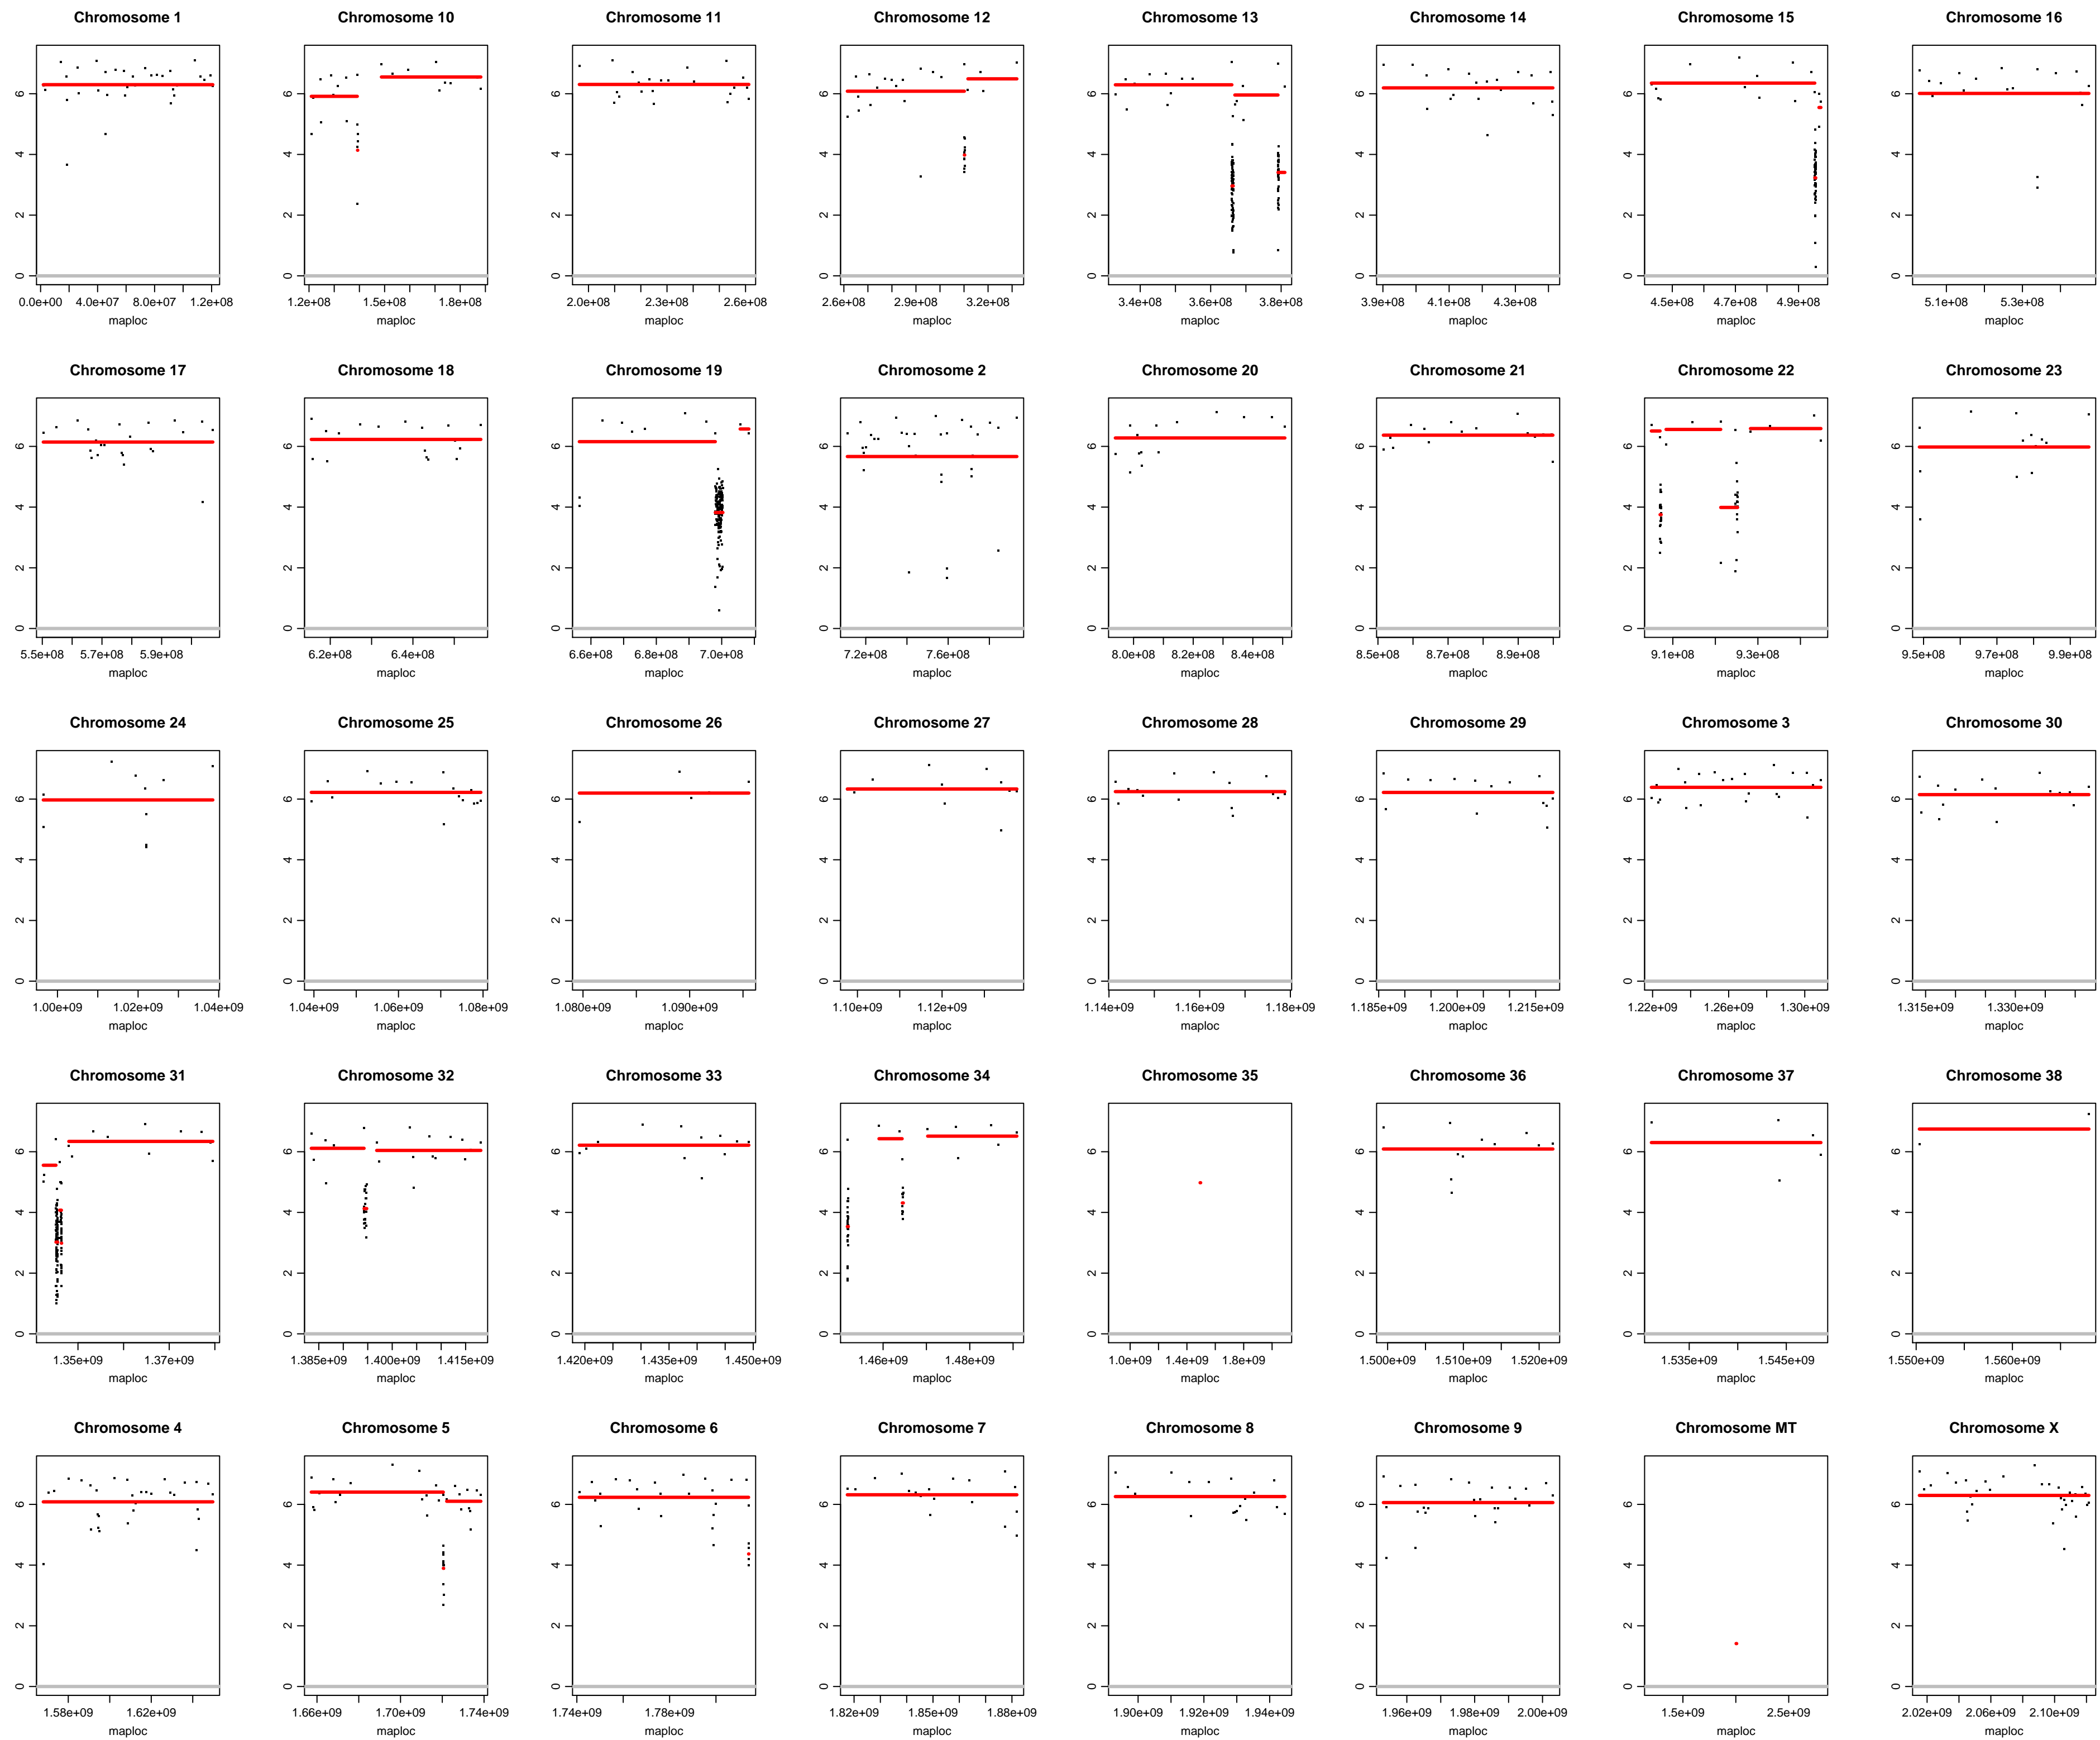

VVUB6.CanFam3

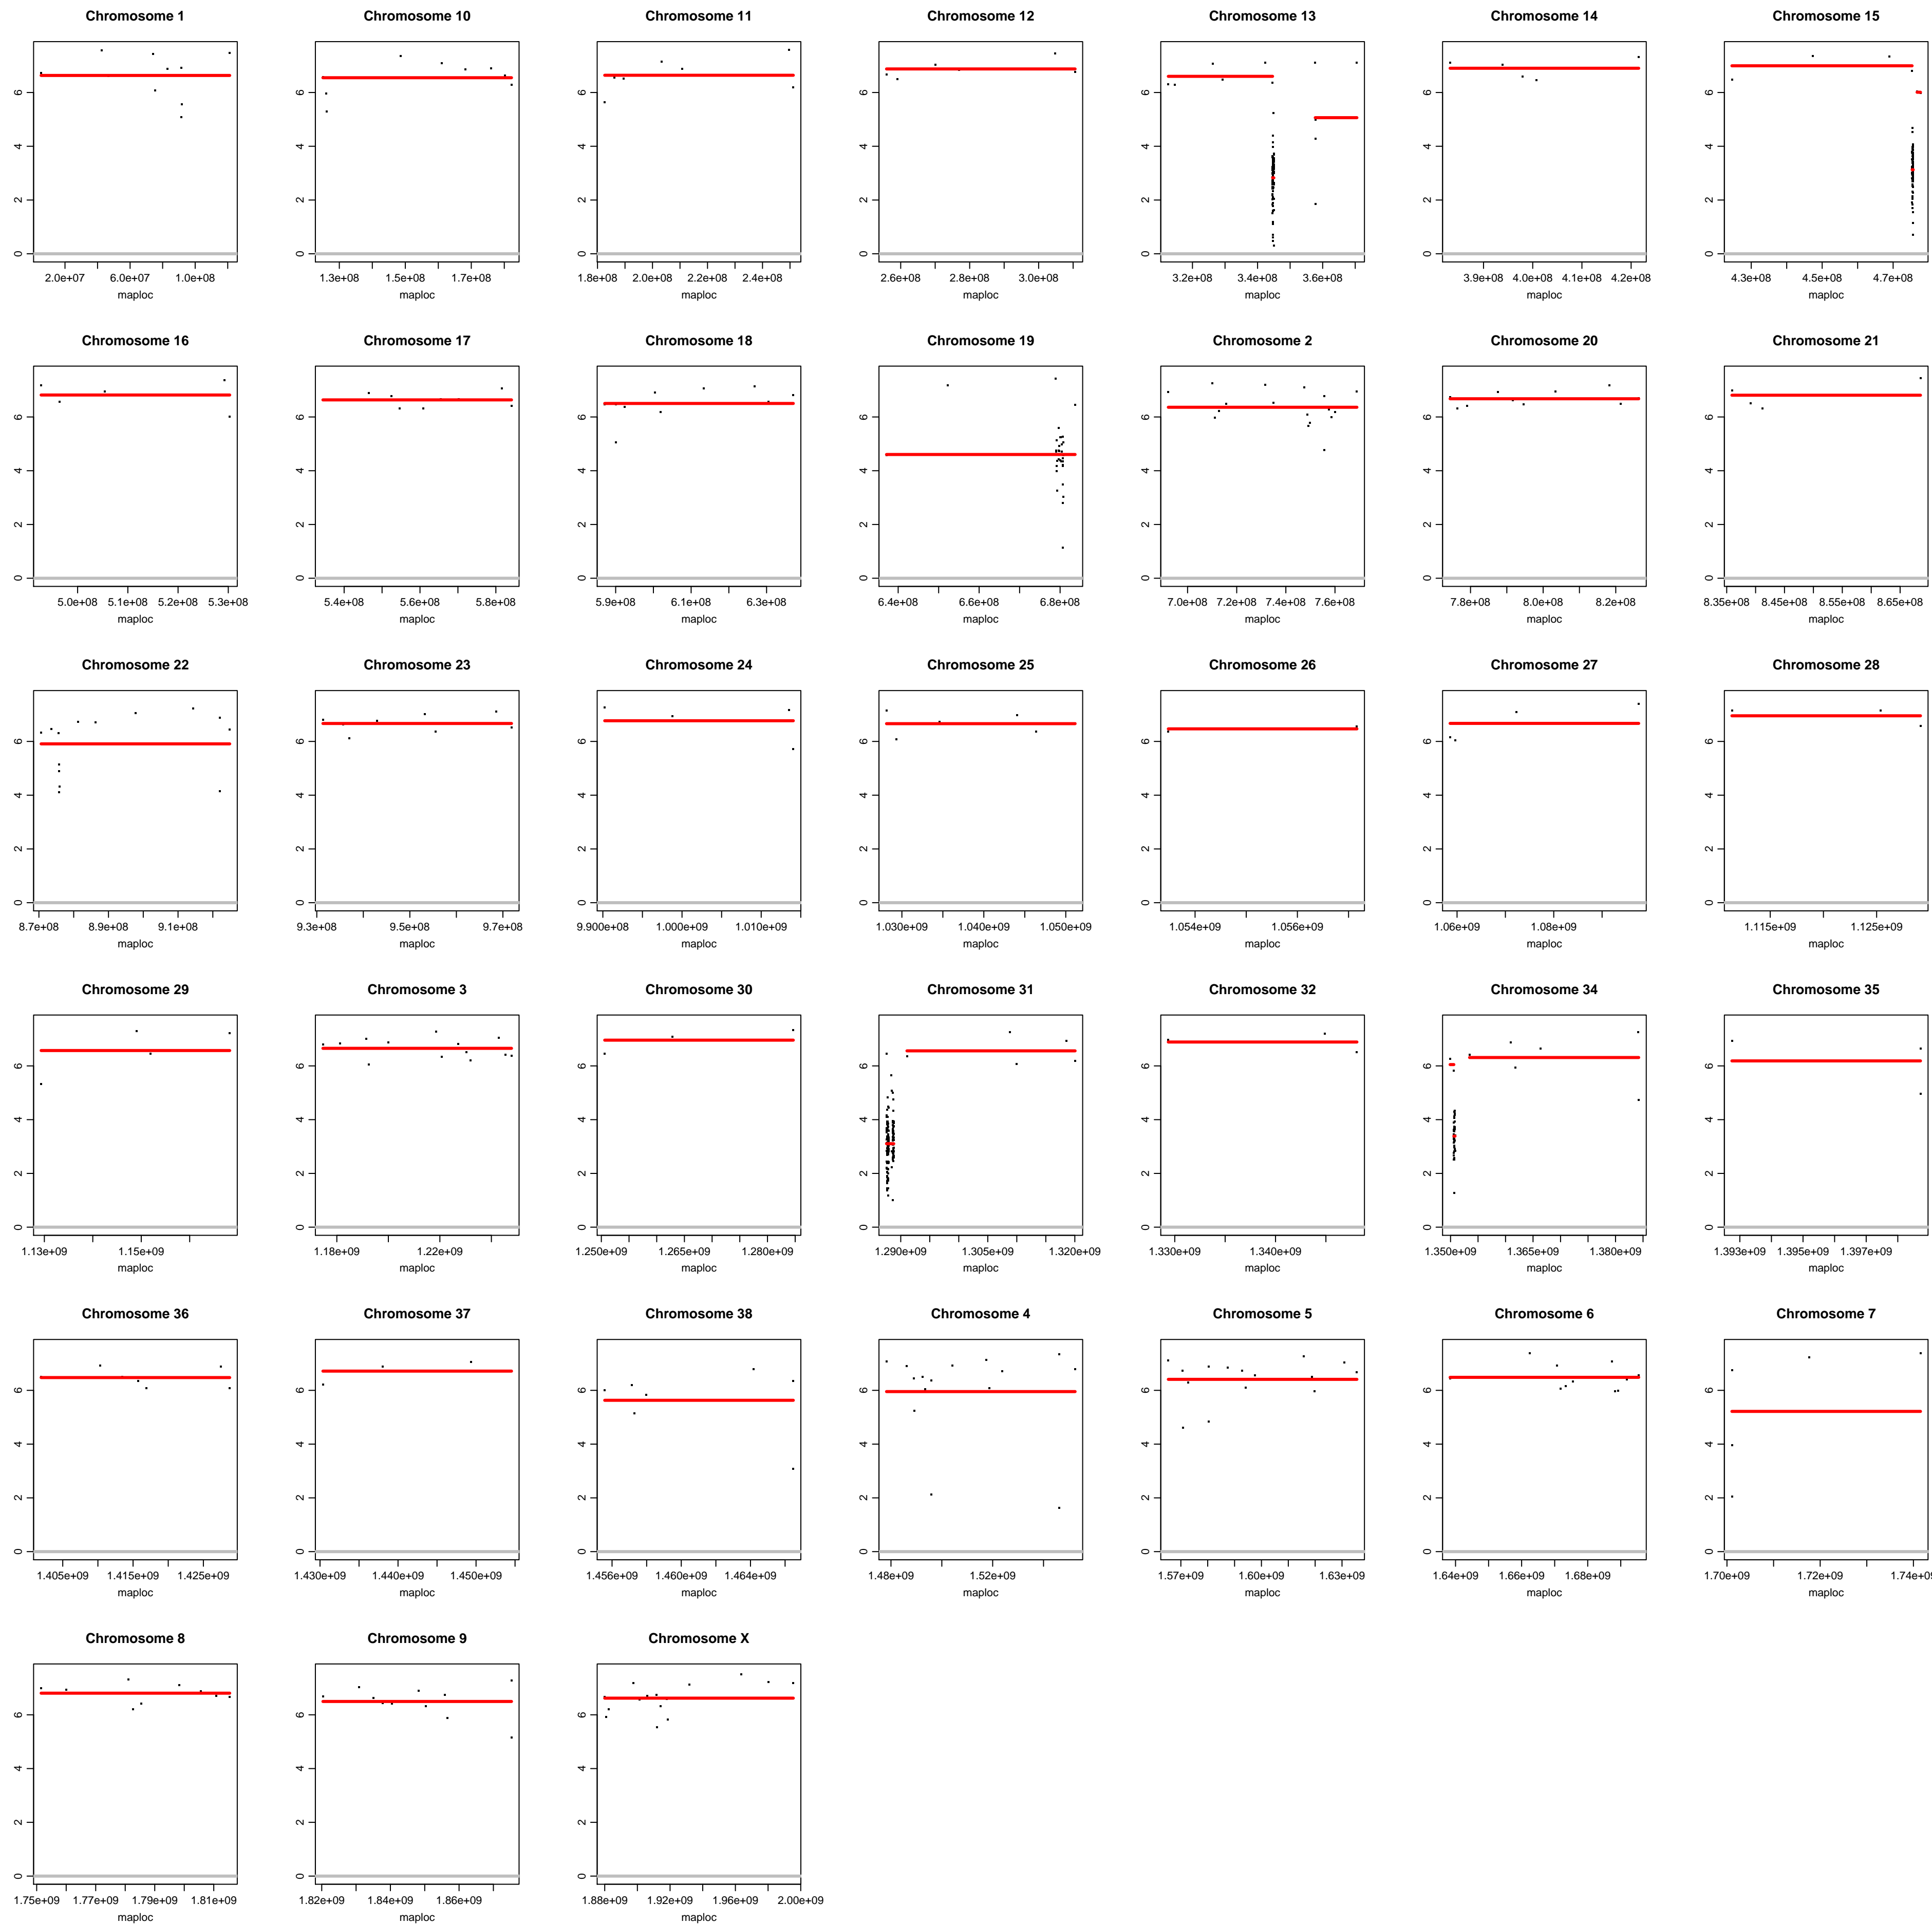

NPPB1.CanFam3

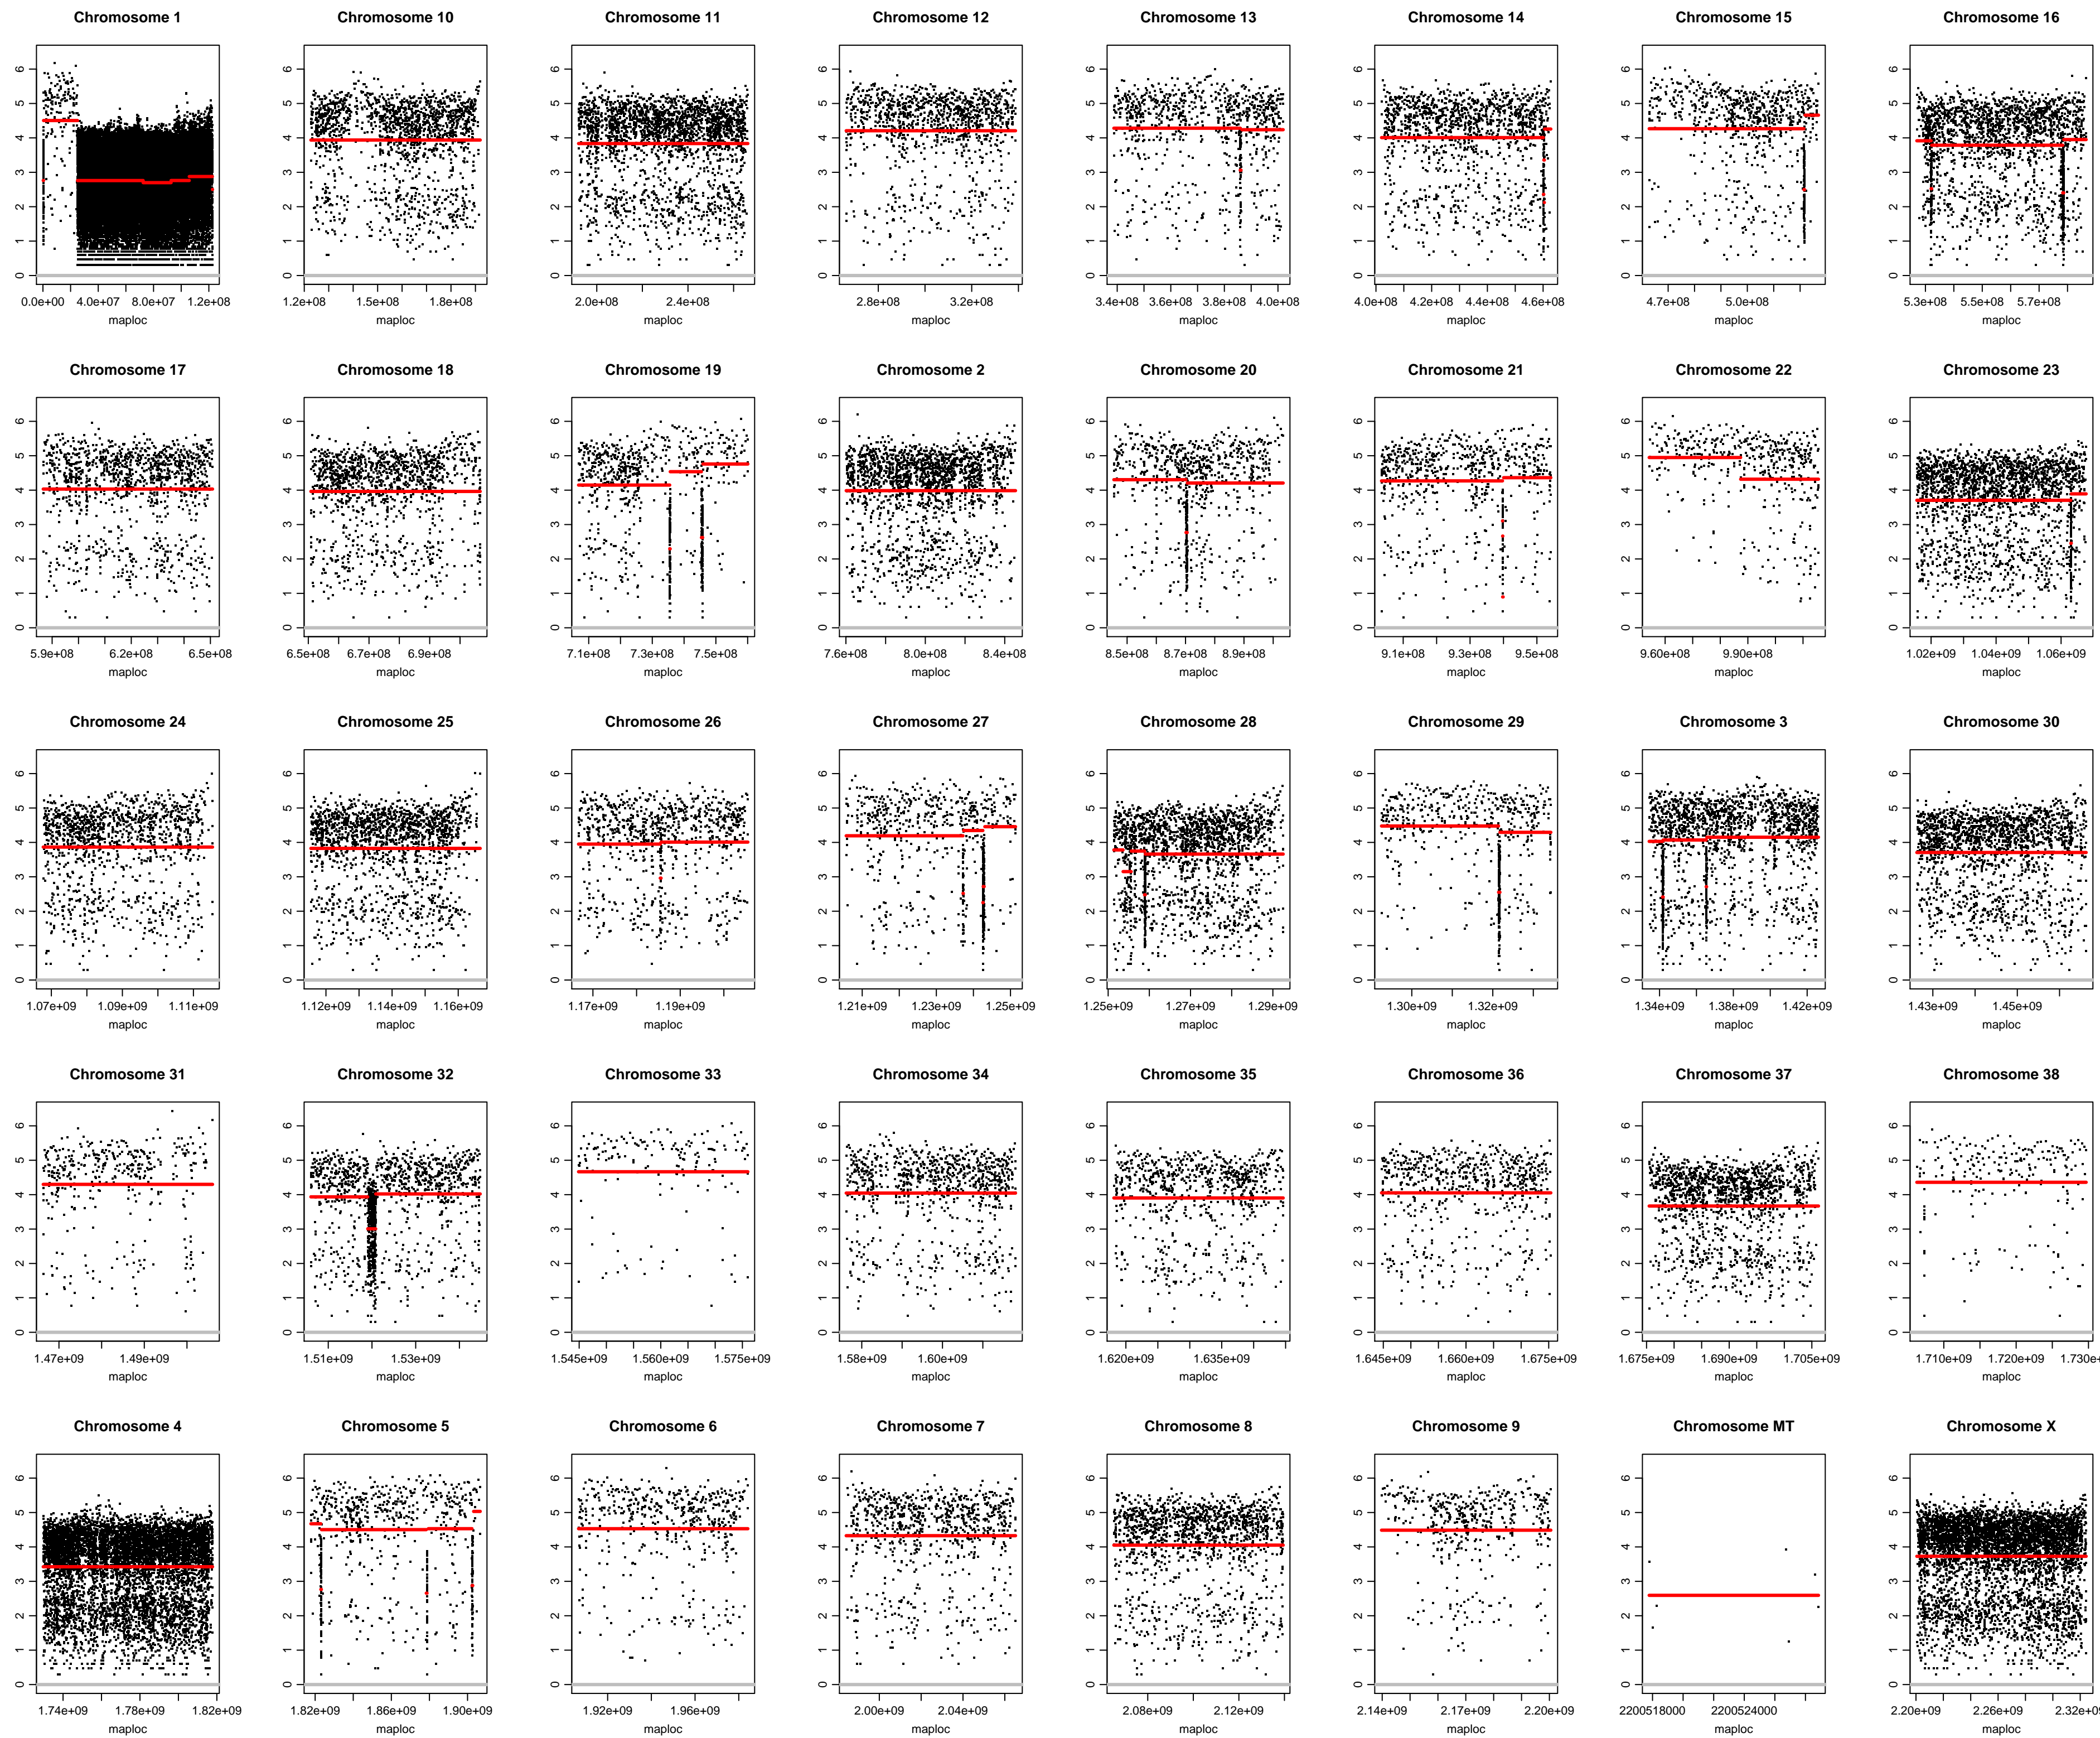

NPPB2.CanFam3

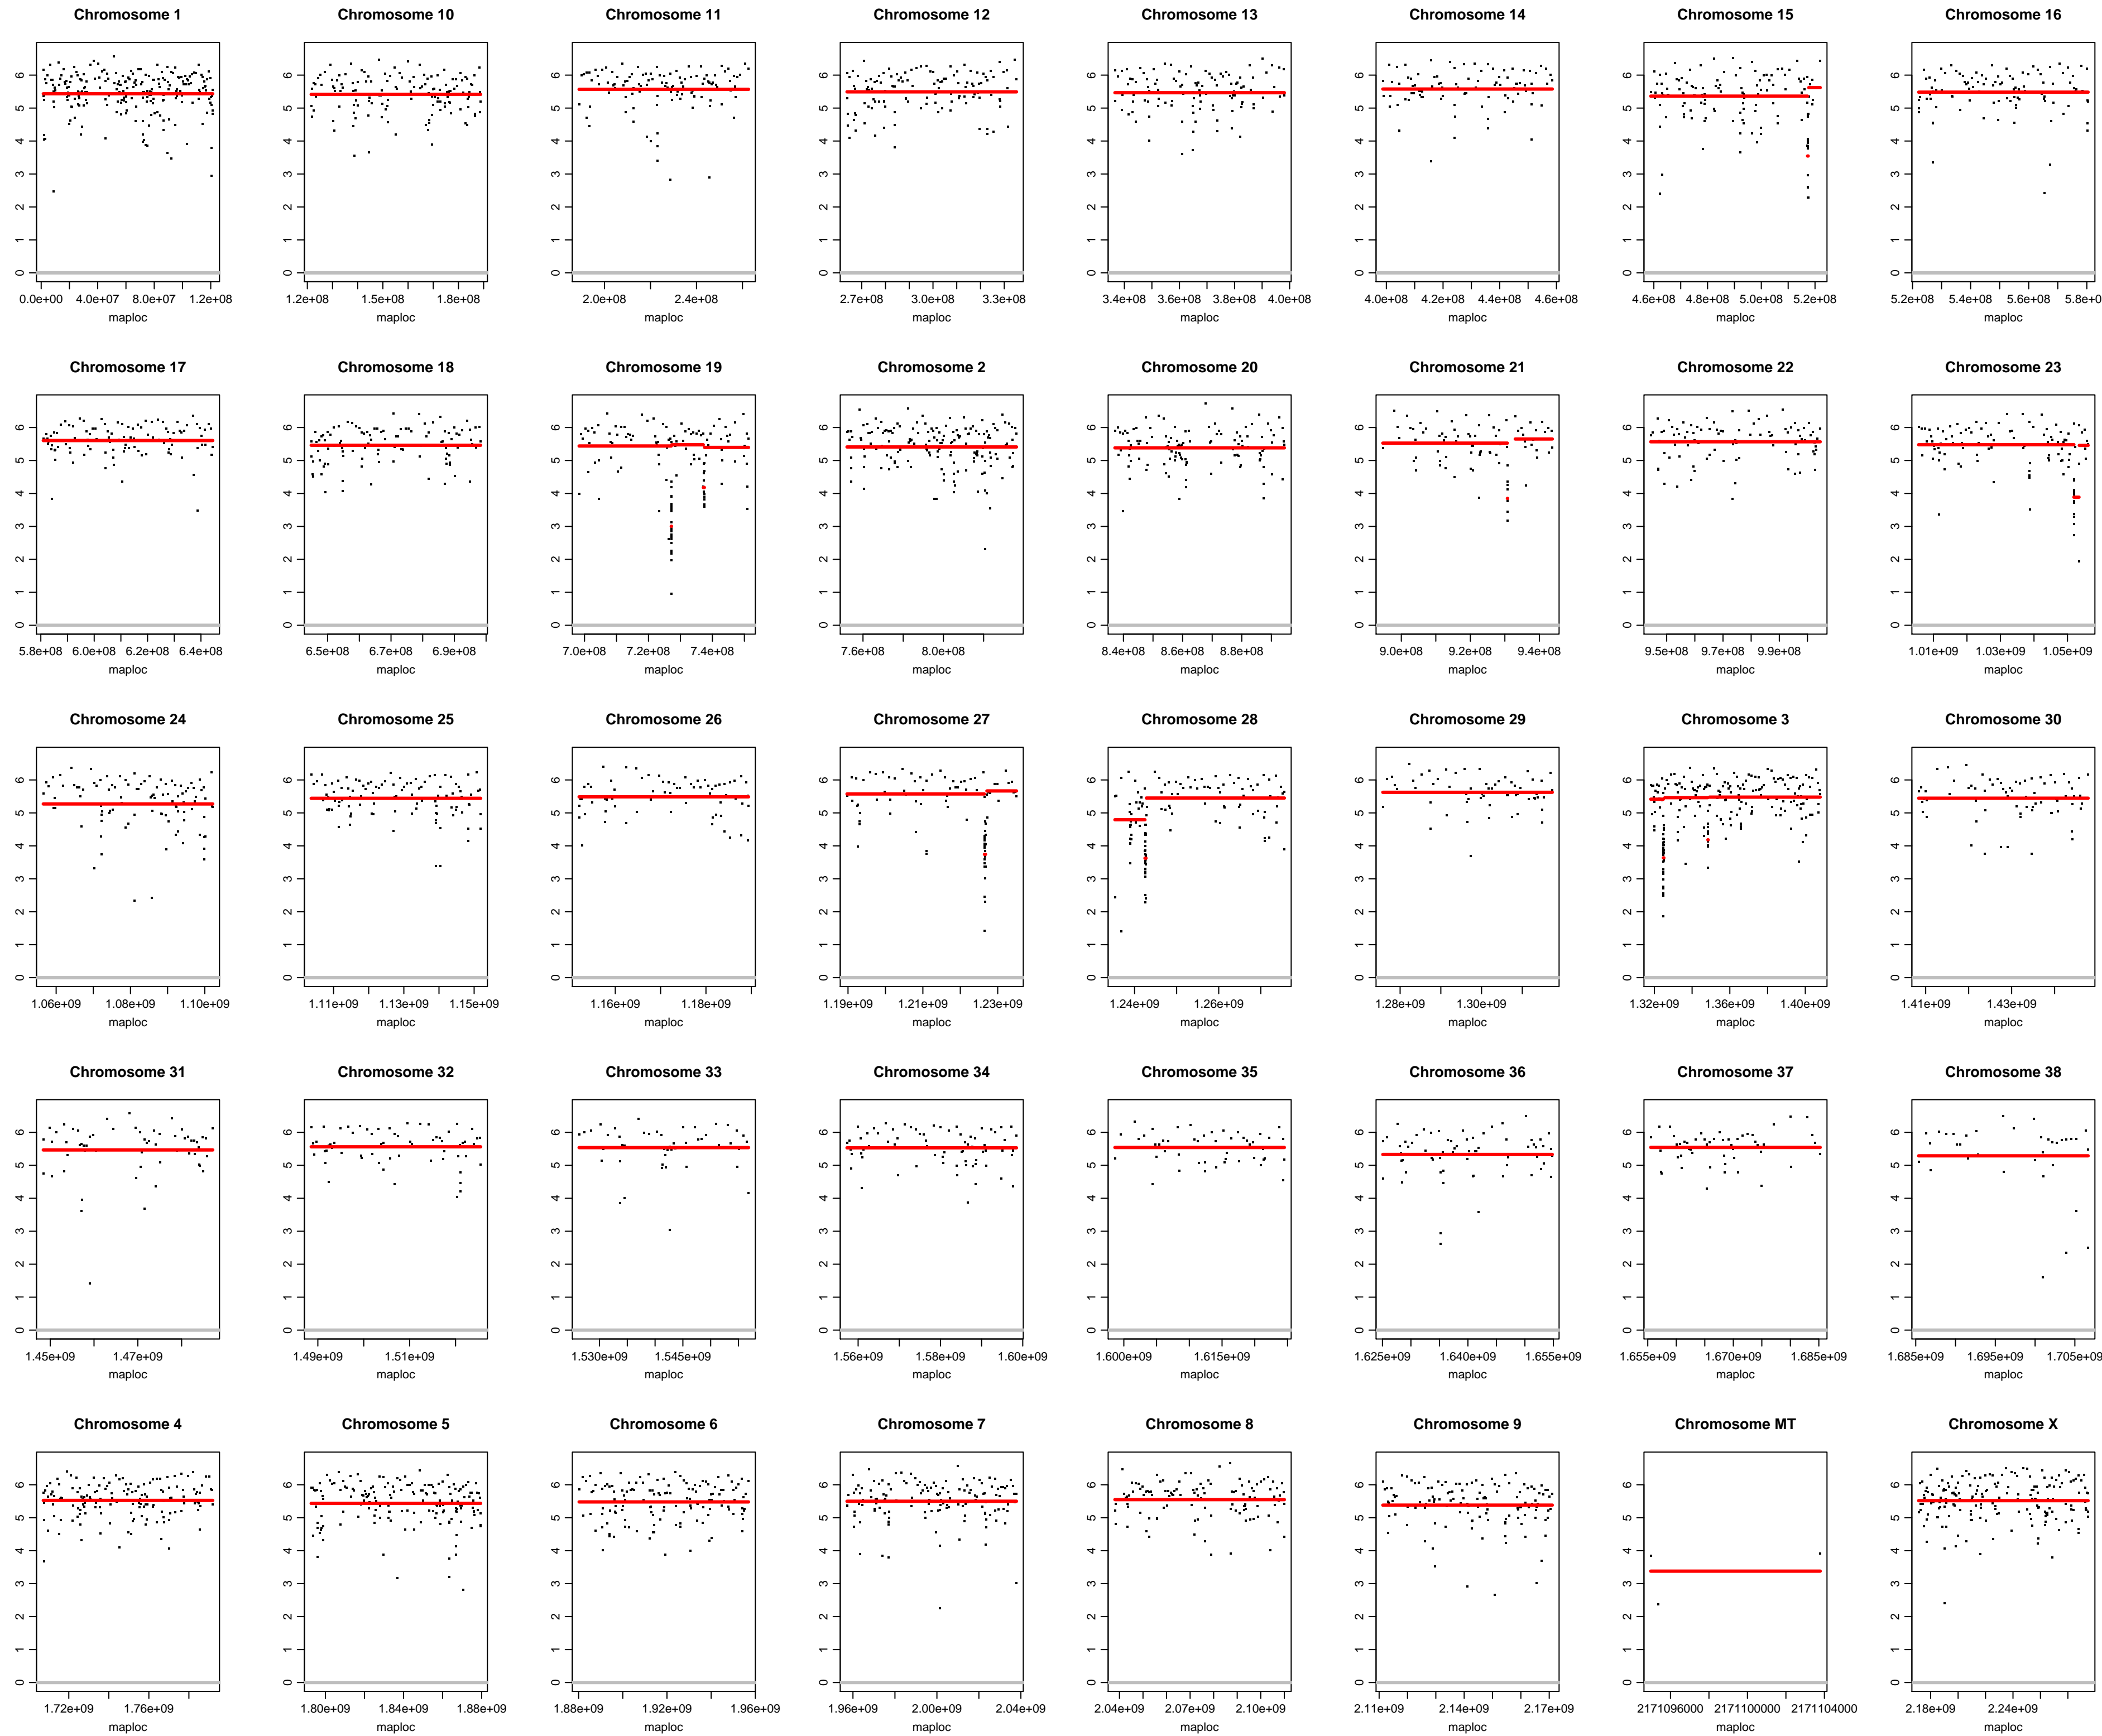



NPPB3.CanFam3

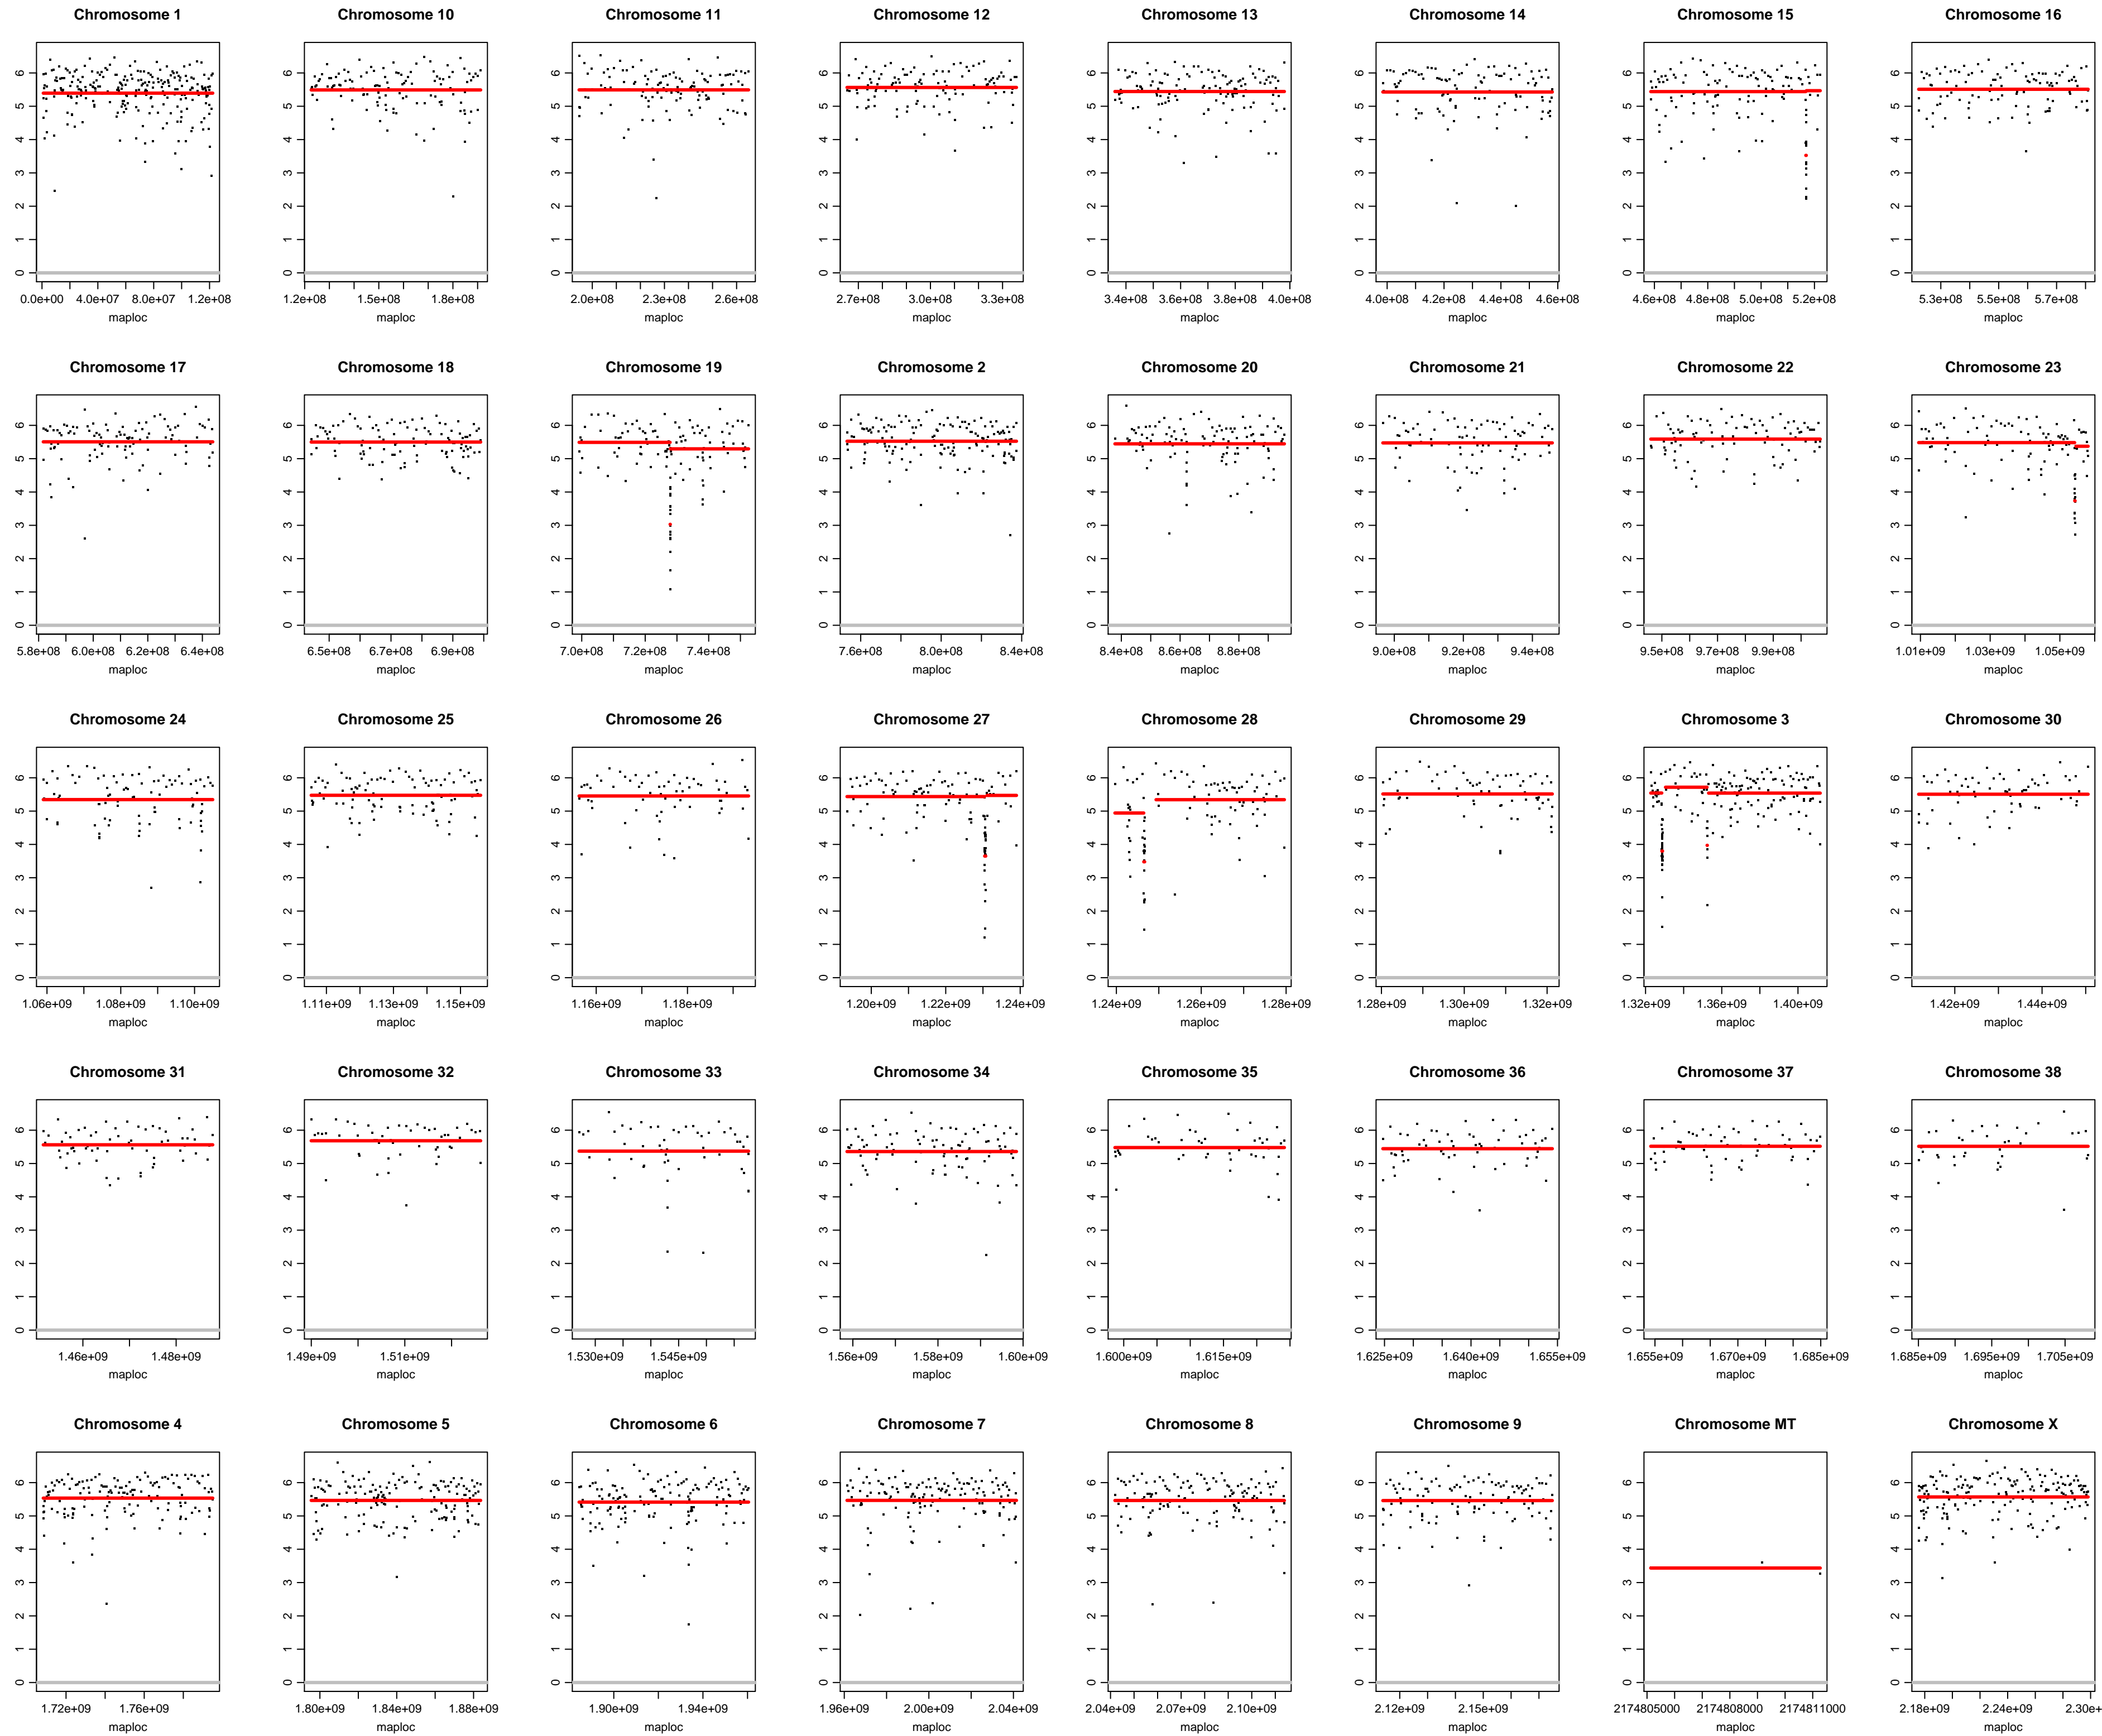

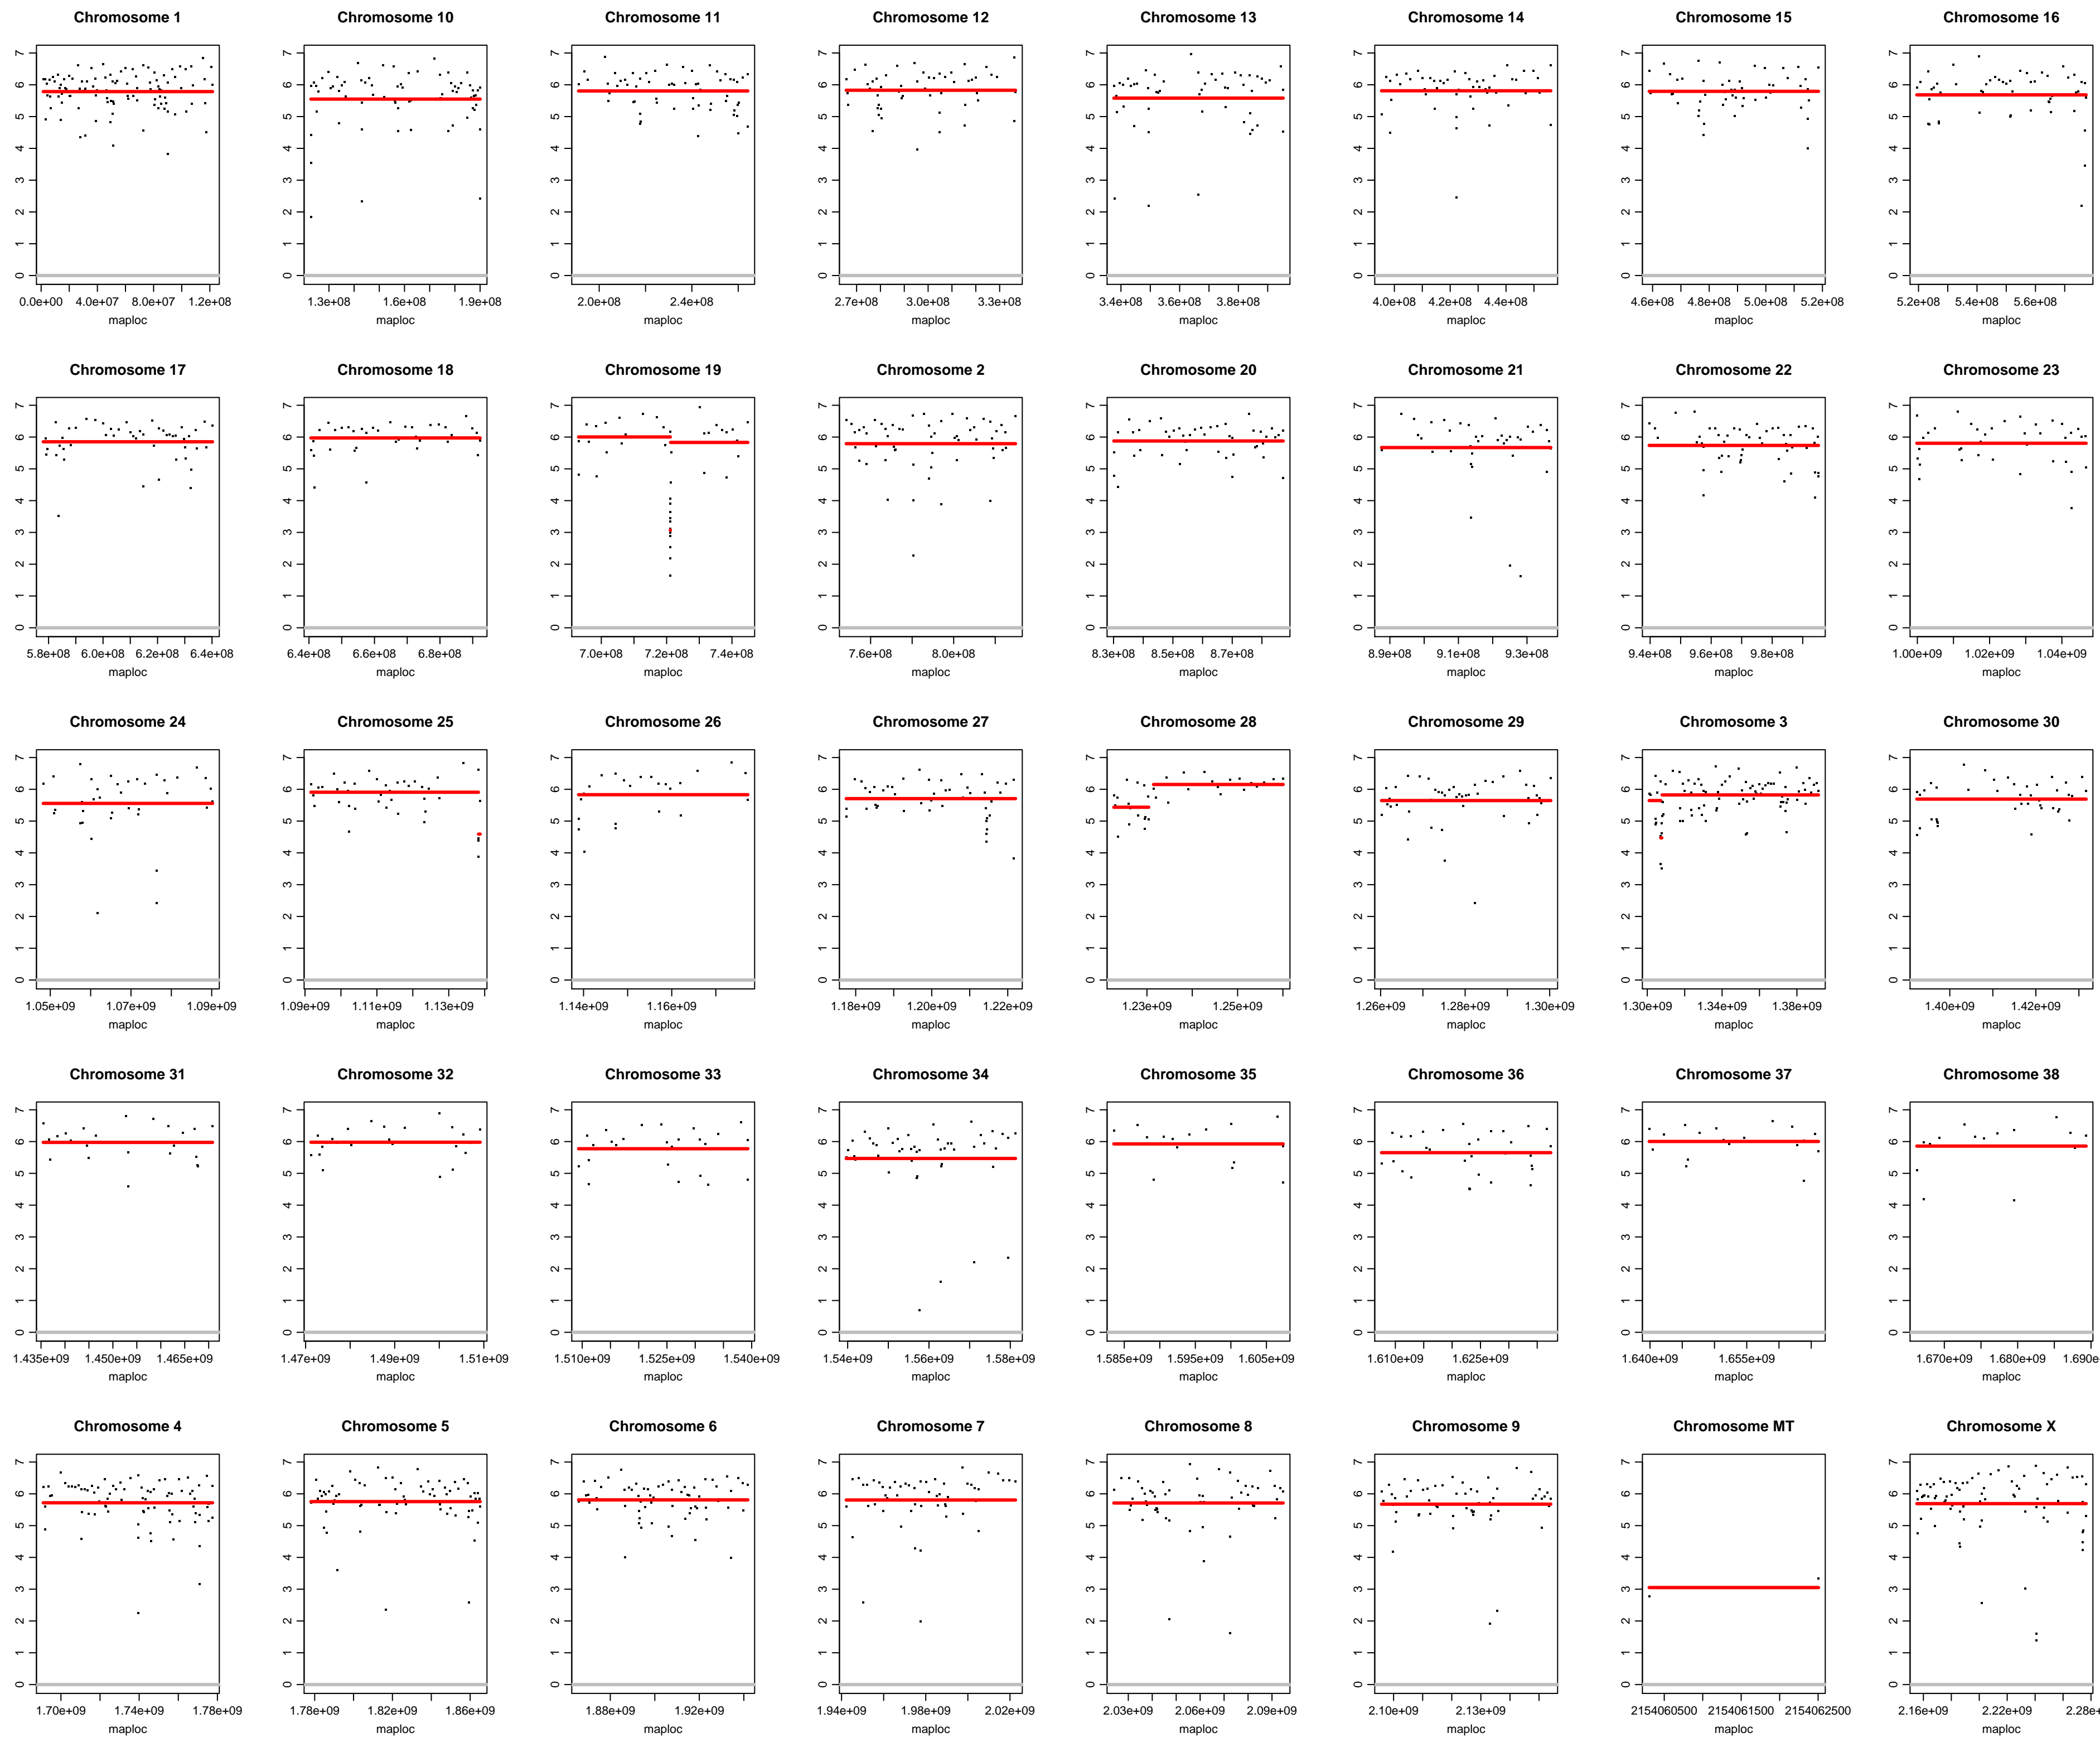

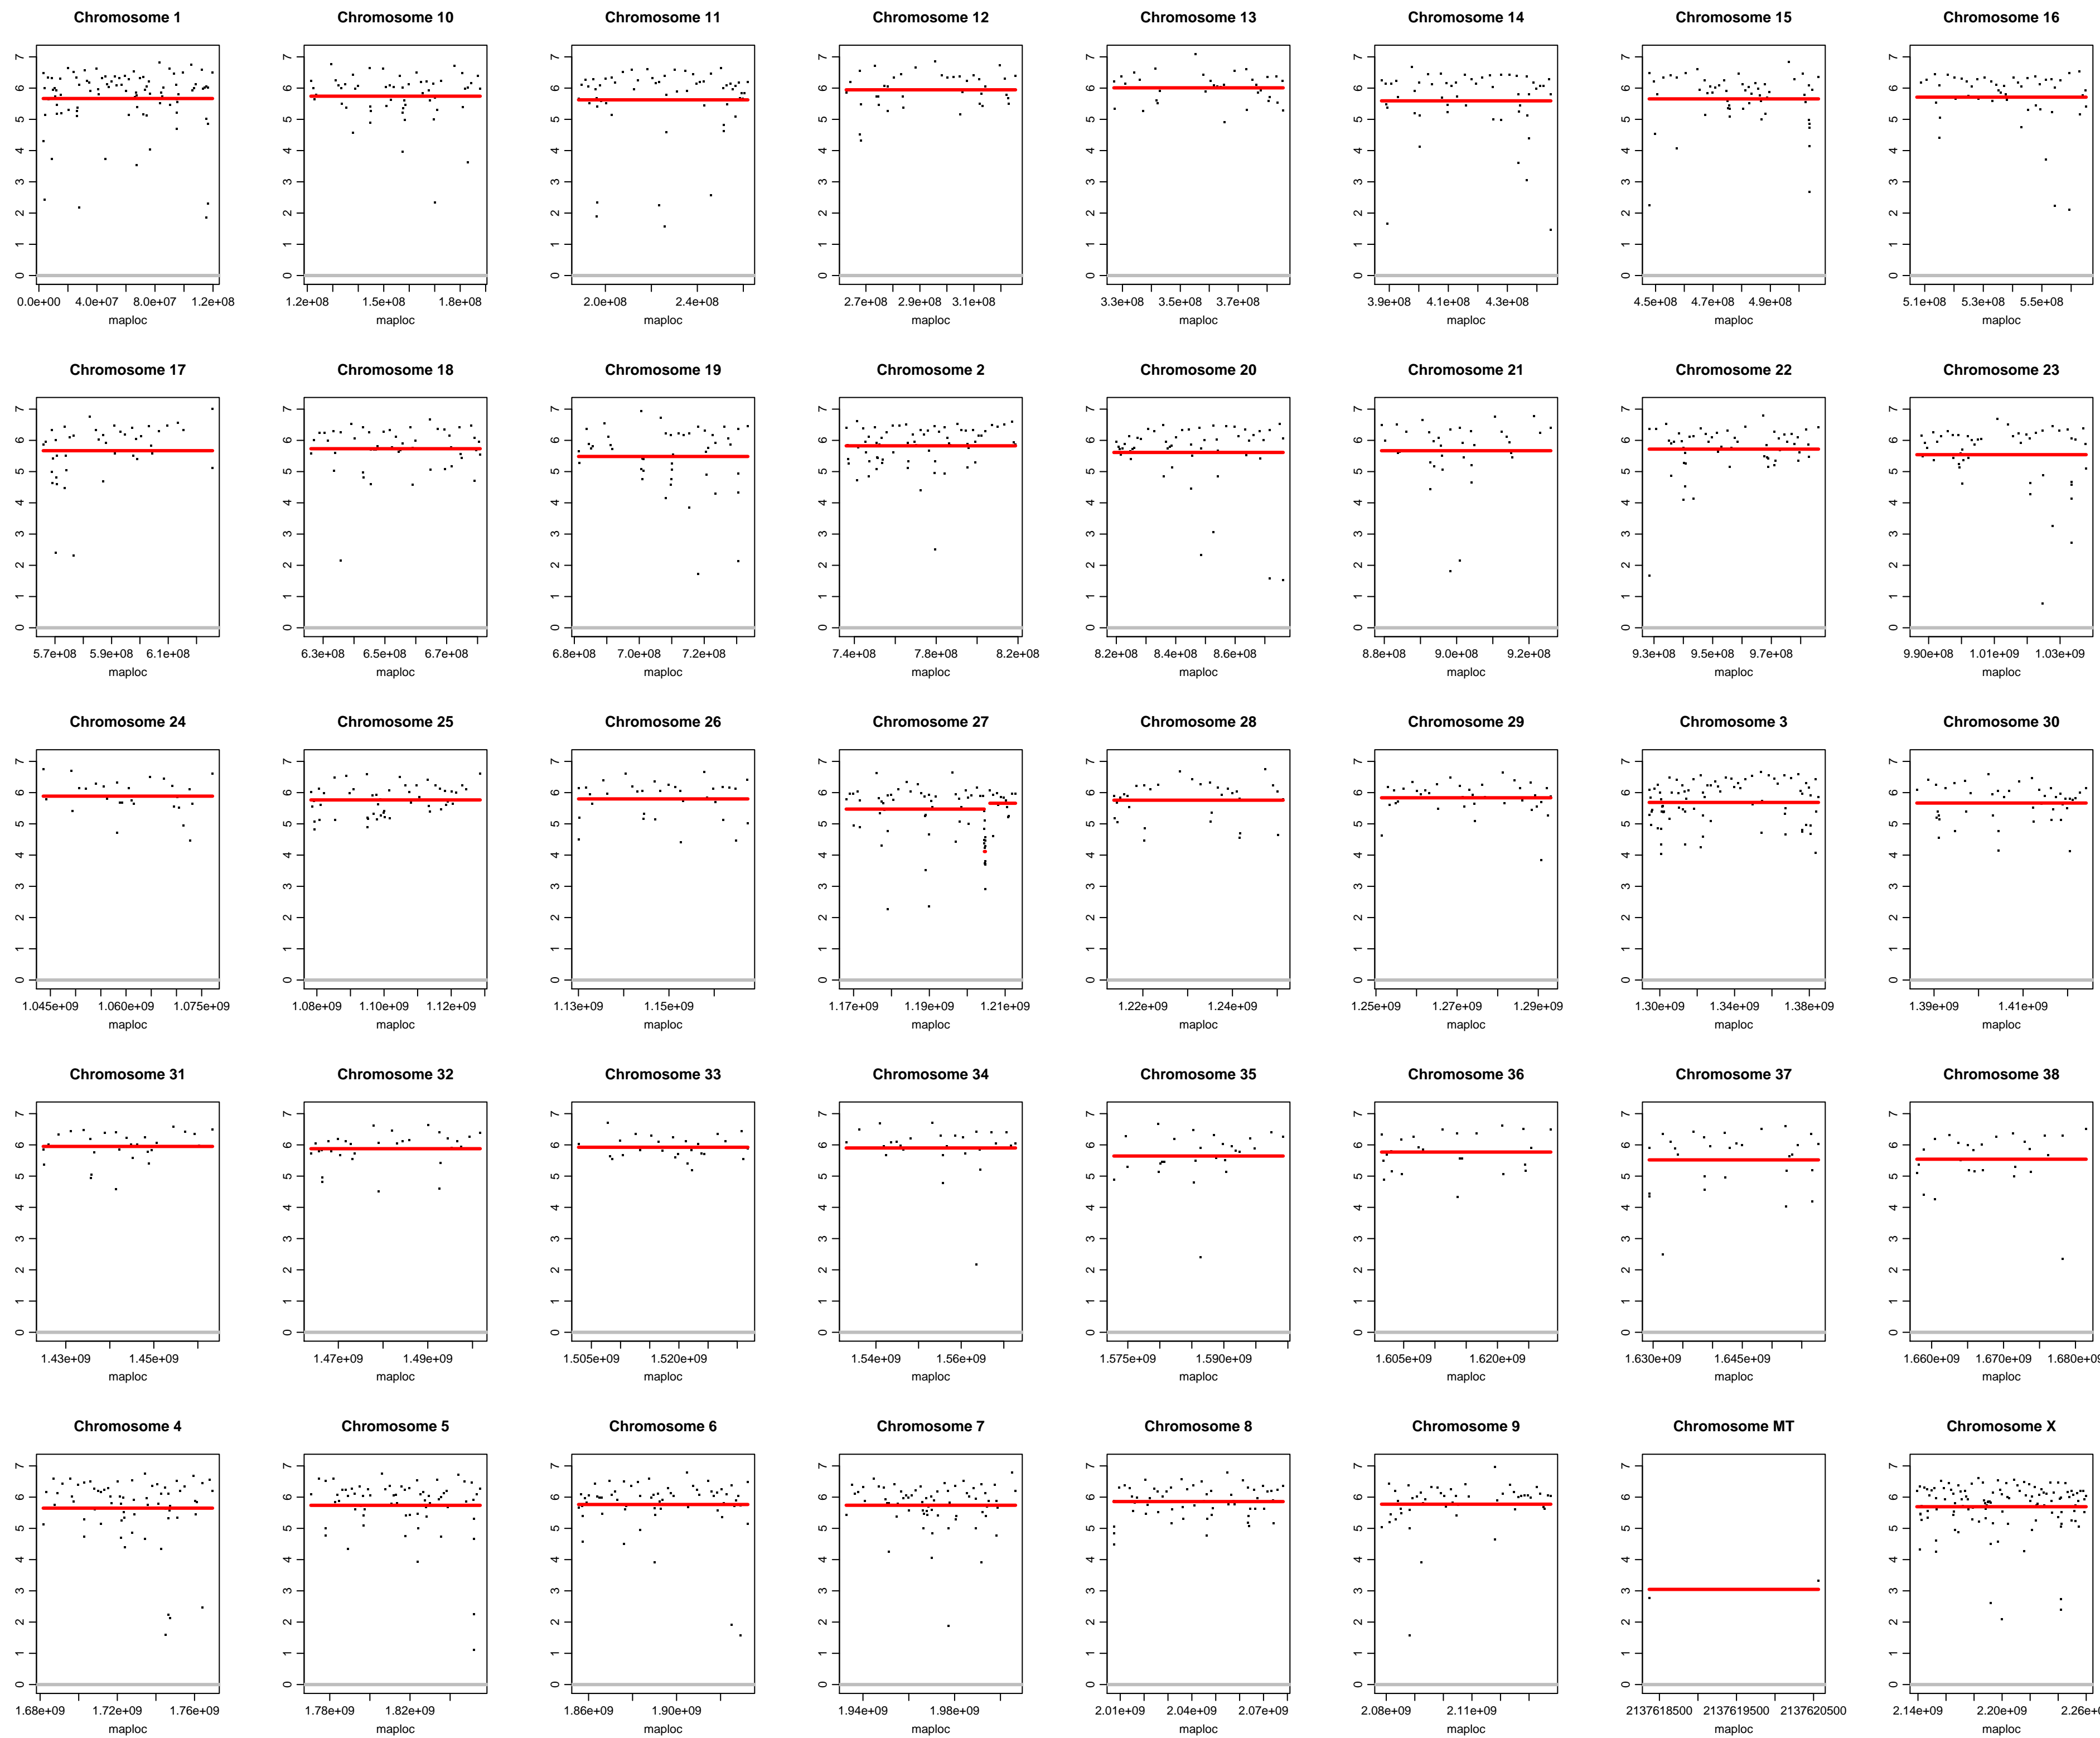

NPPB6\_prox.CanFam3

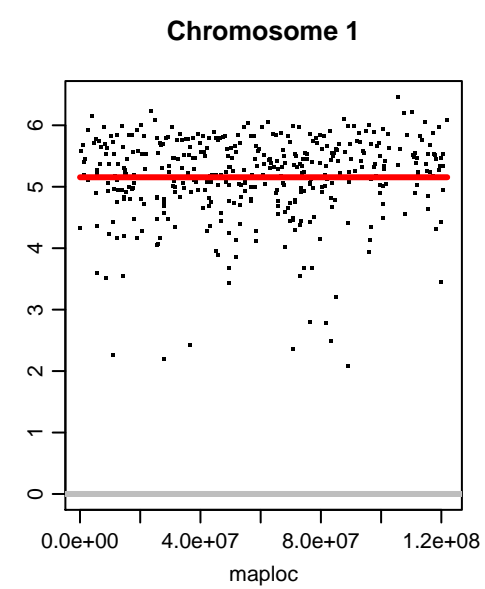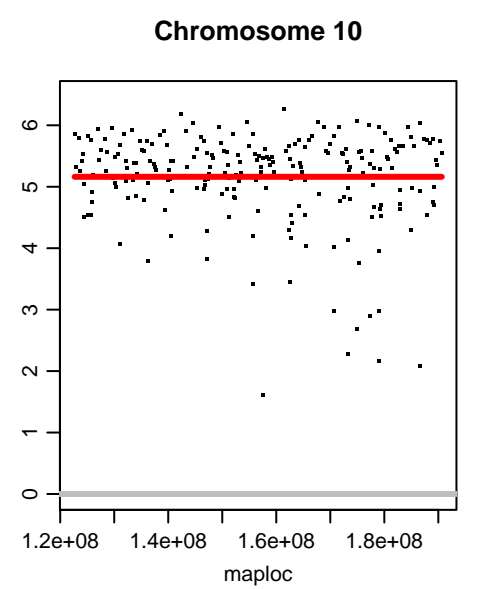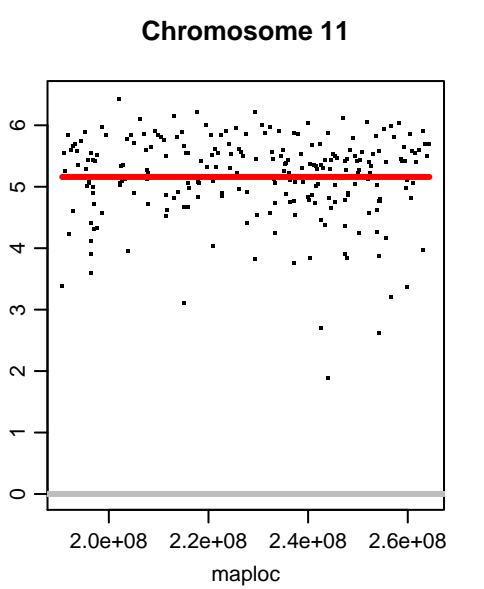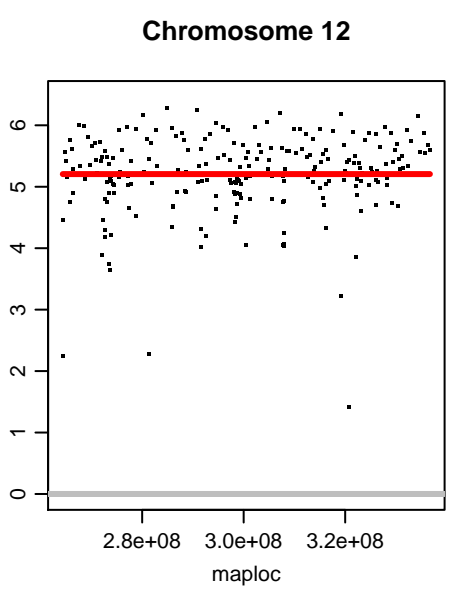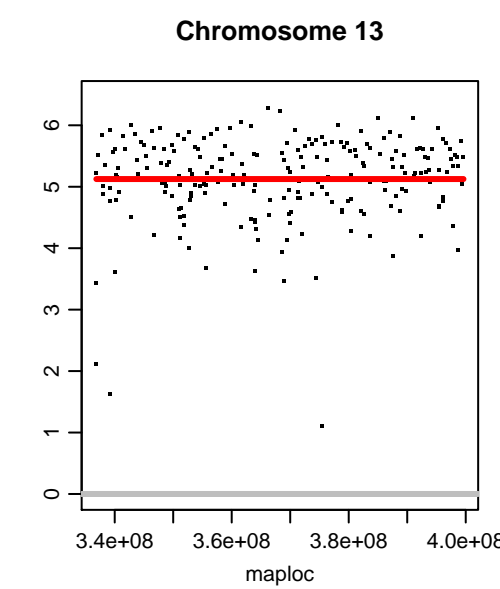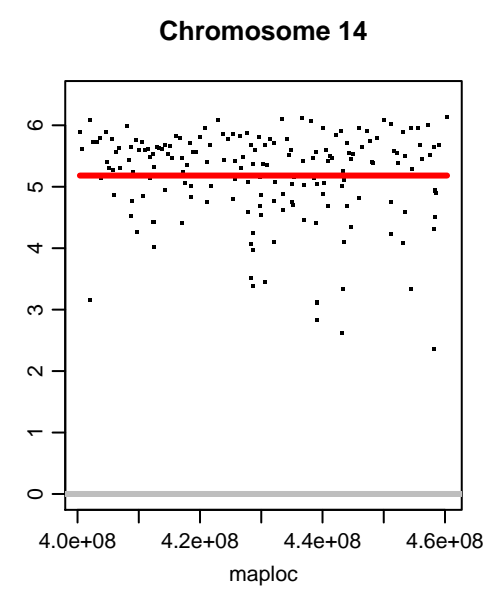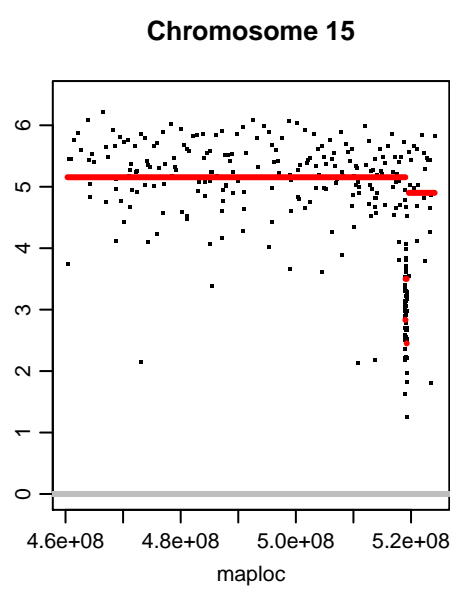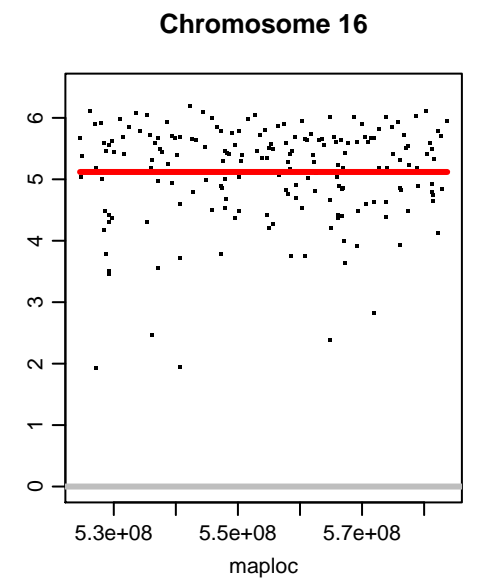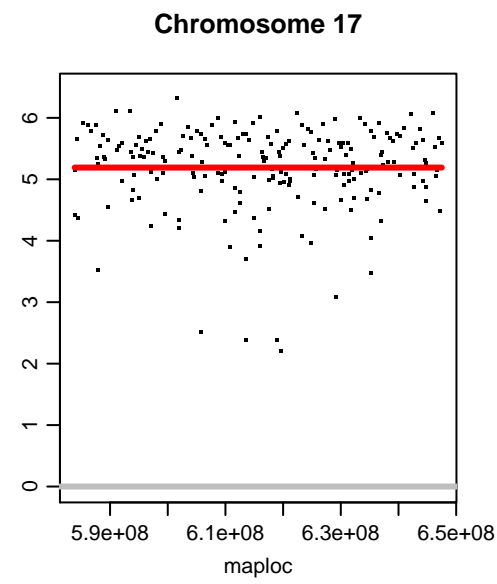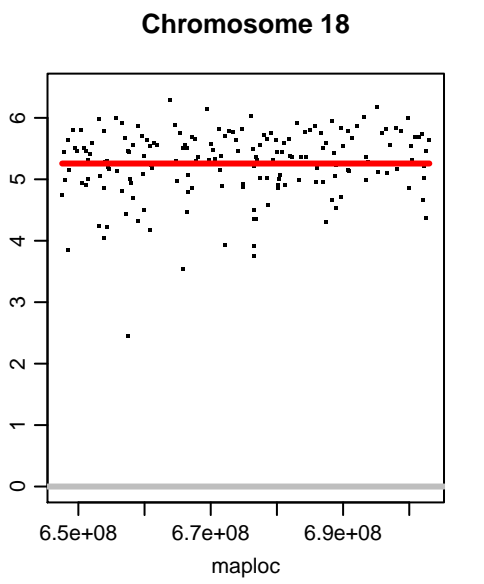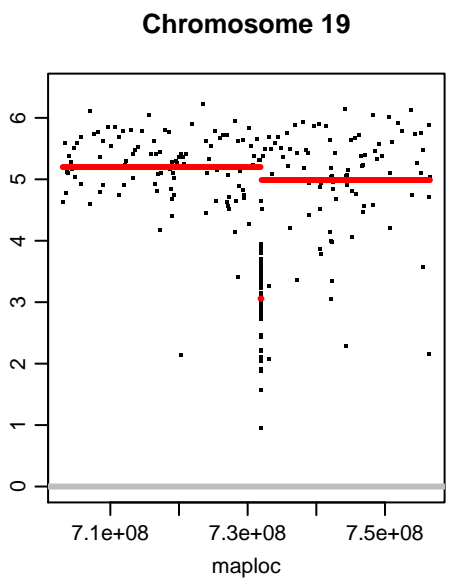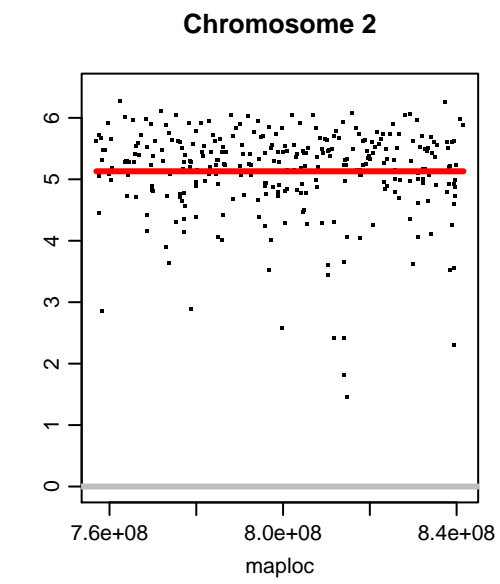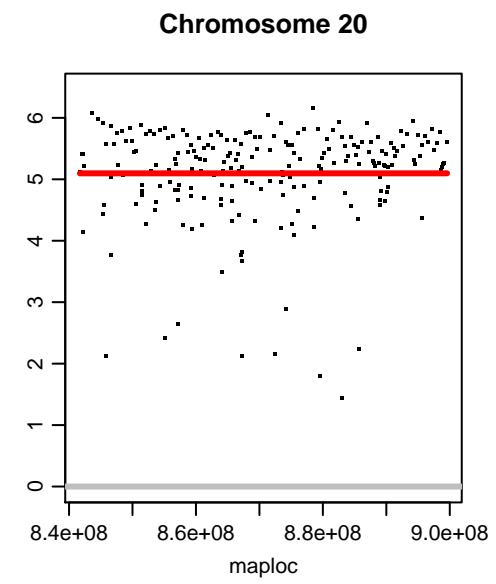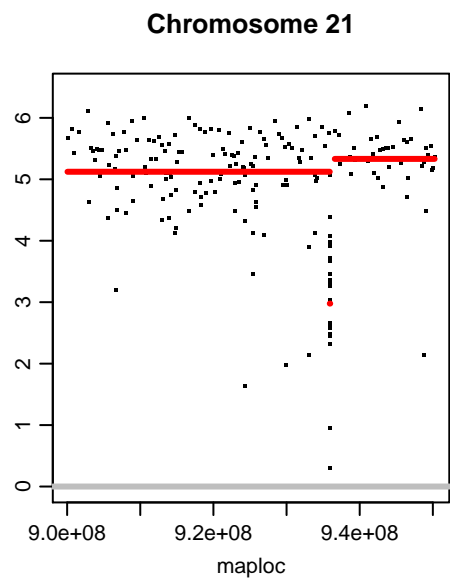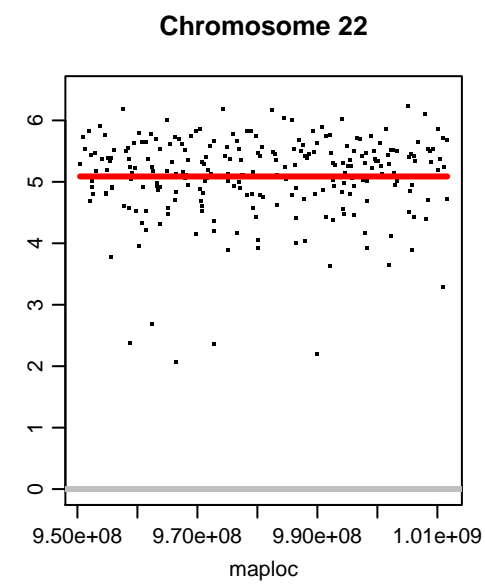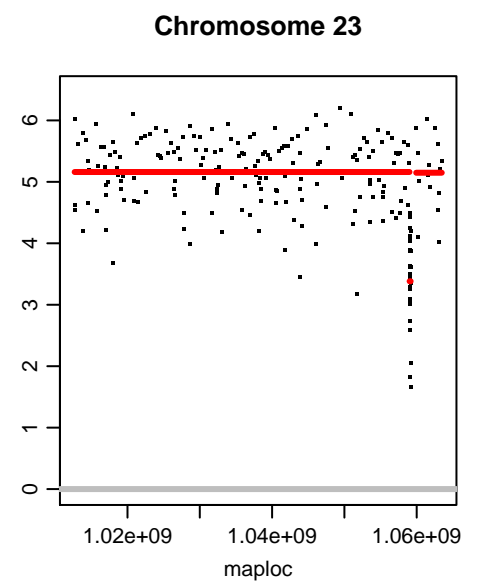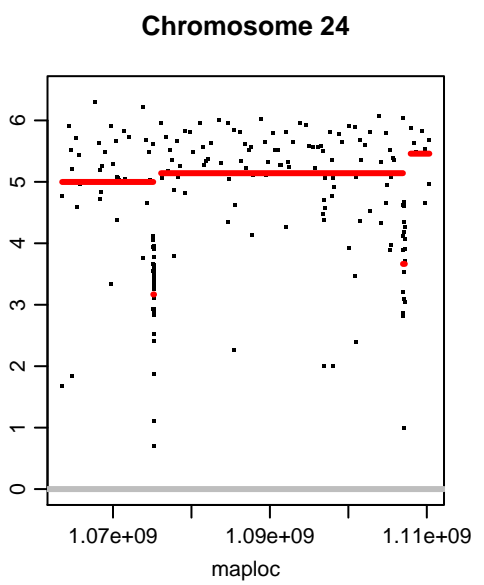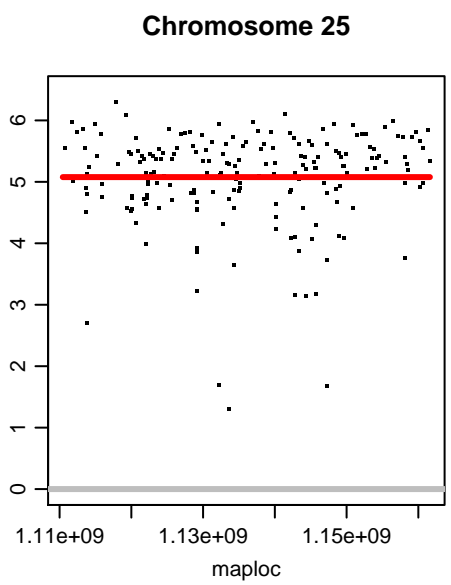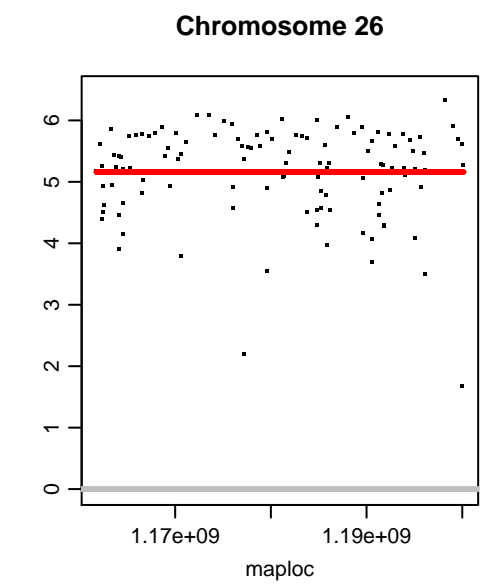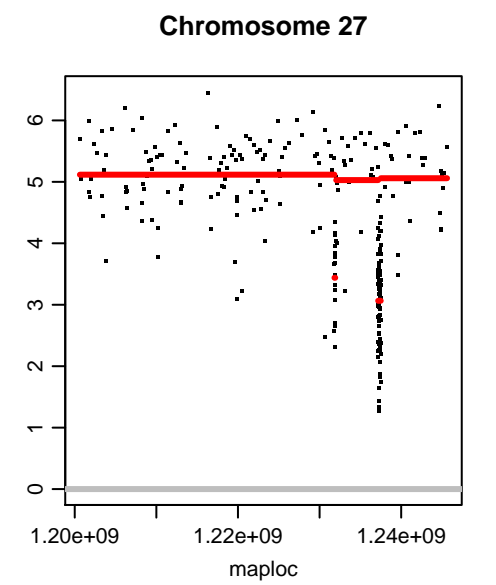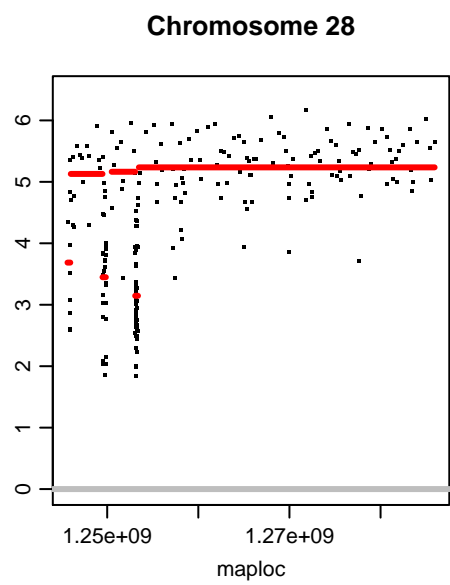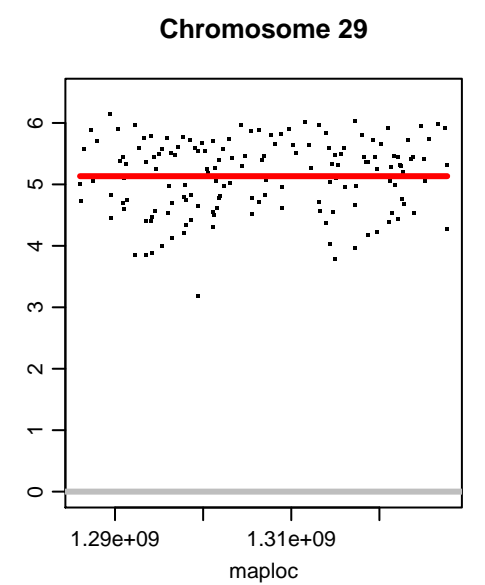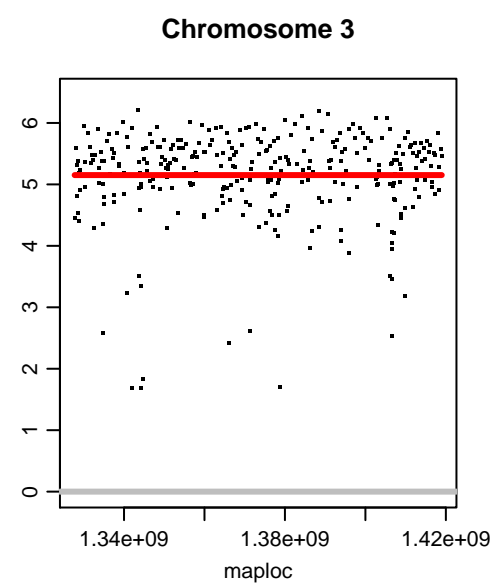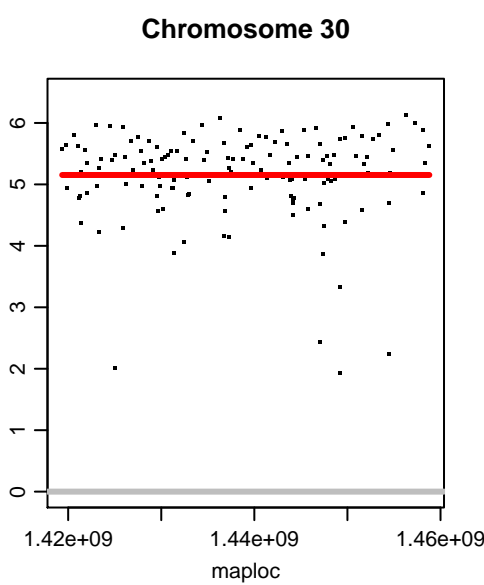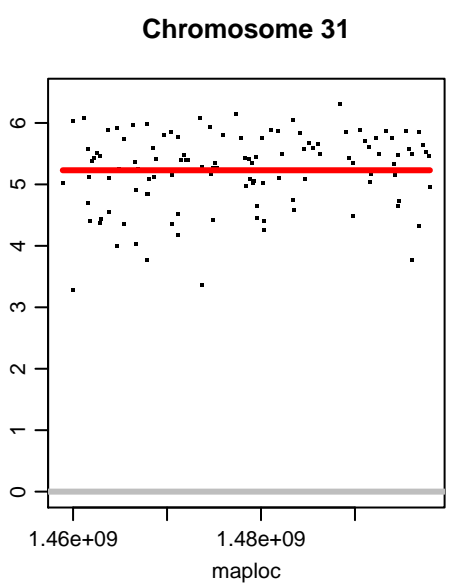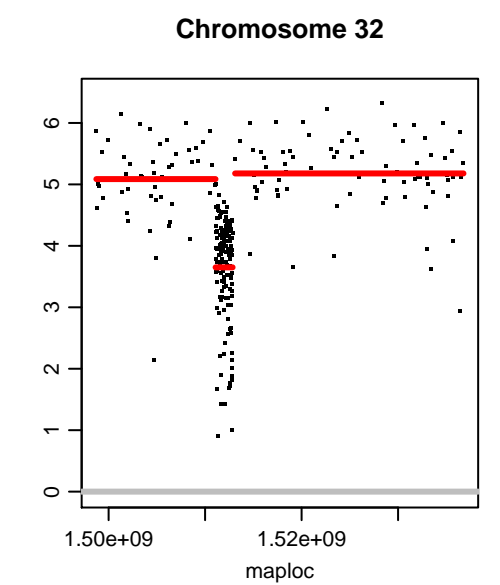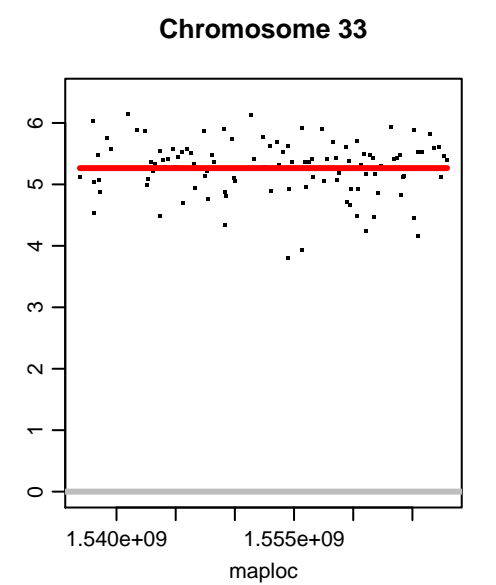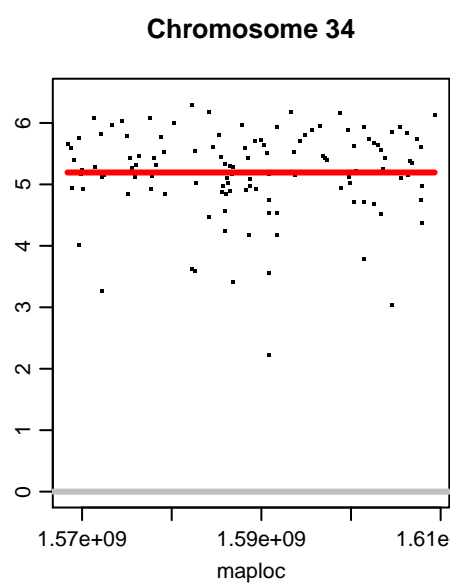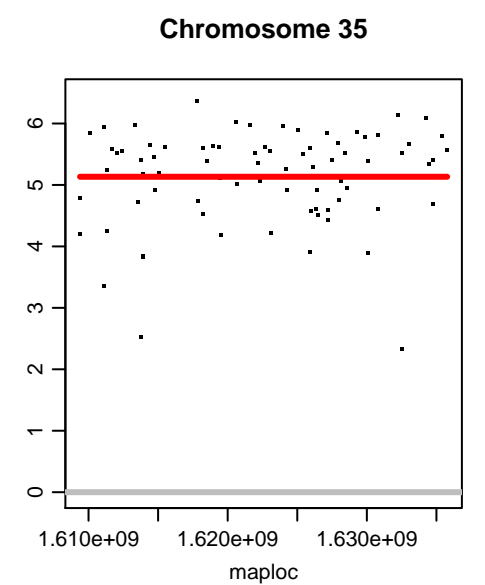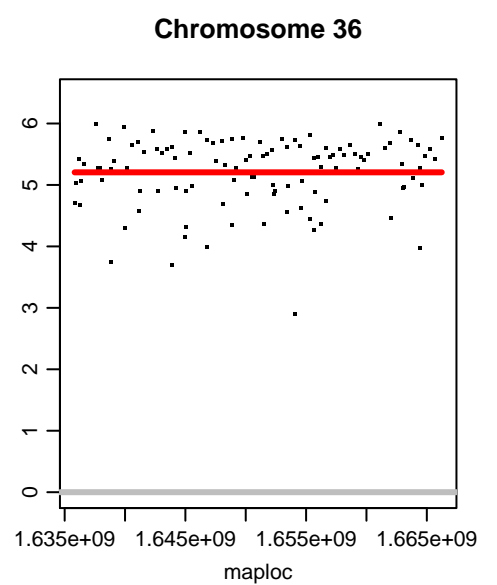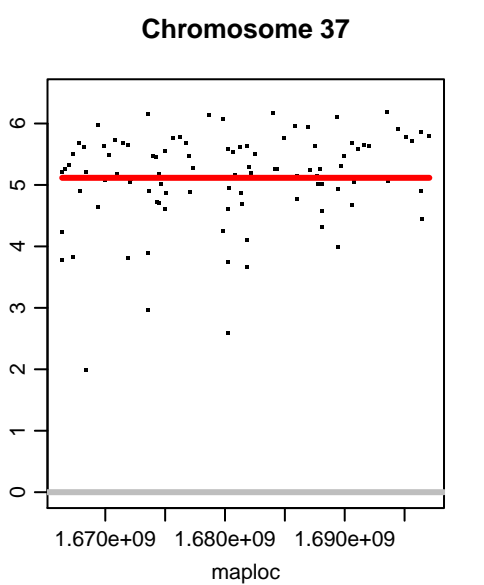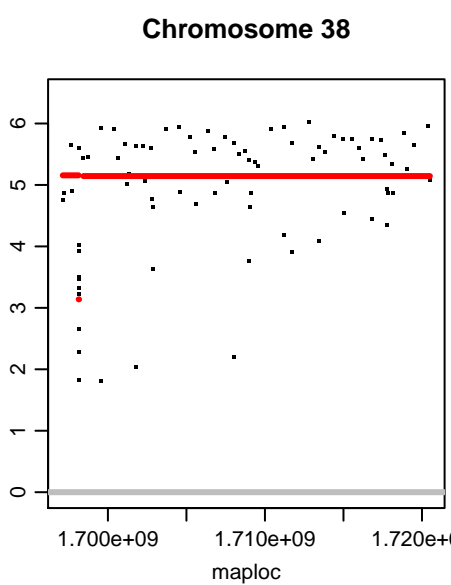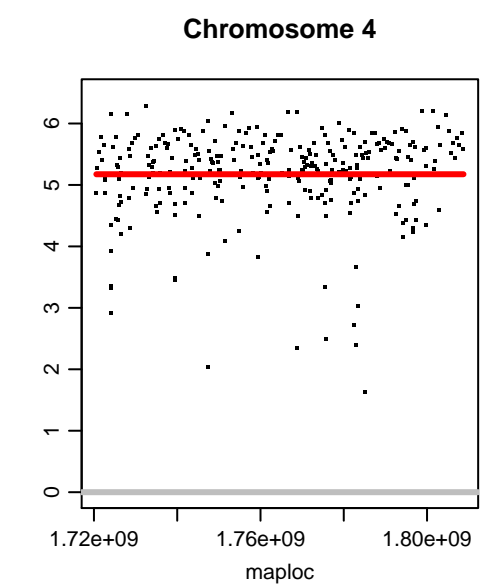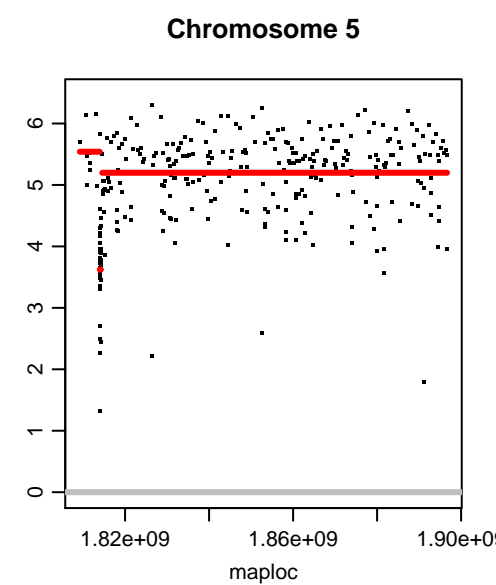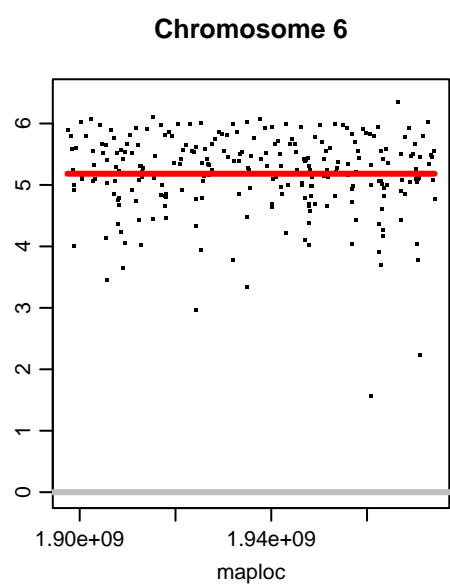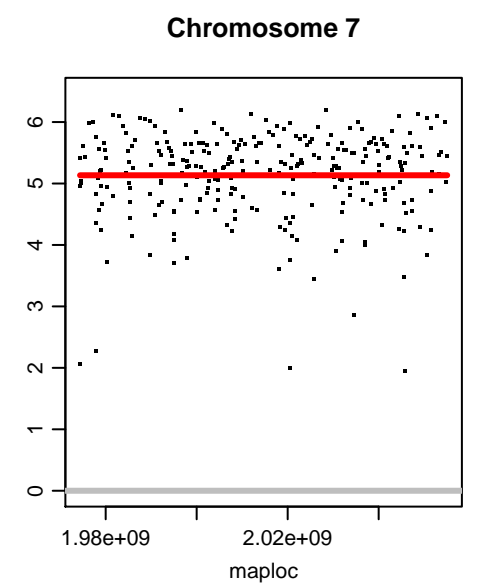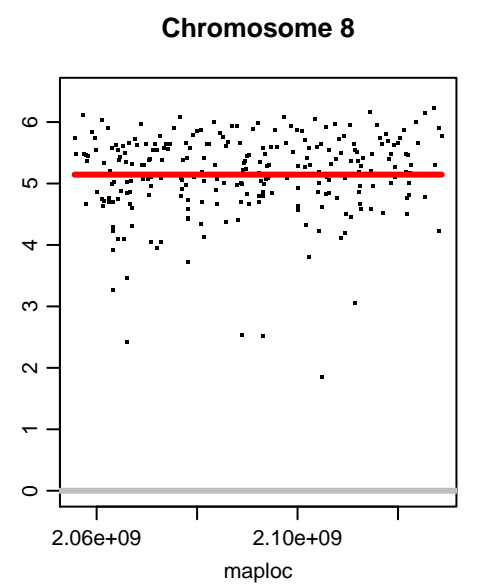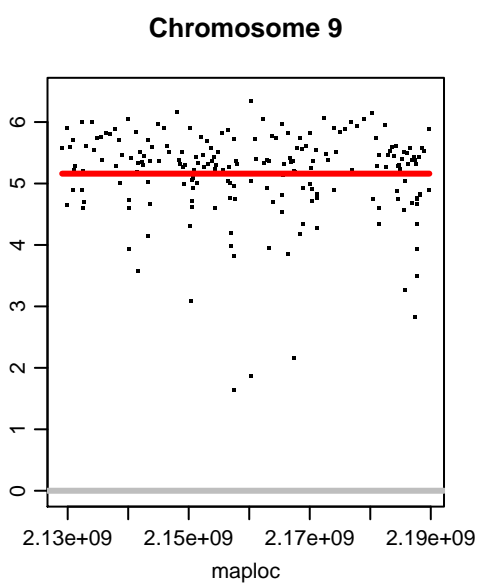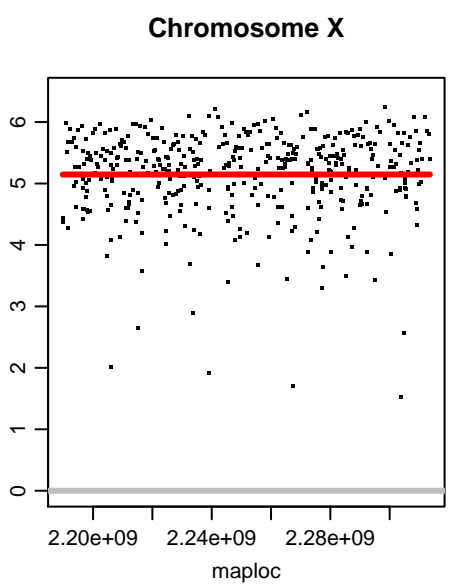

NPPB7\_mid.CanFam3

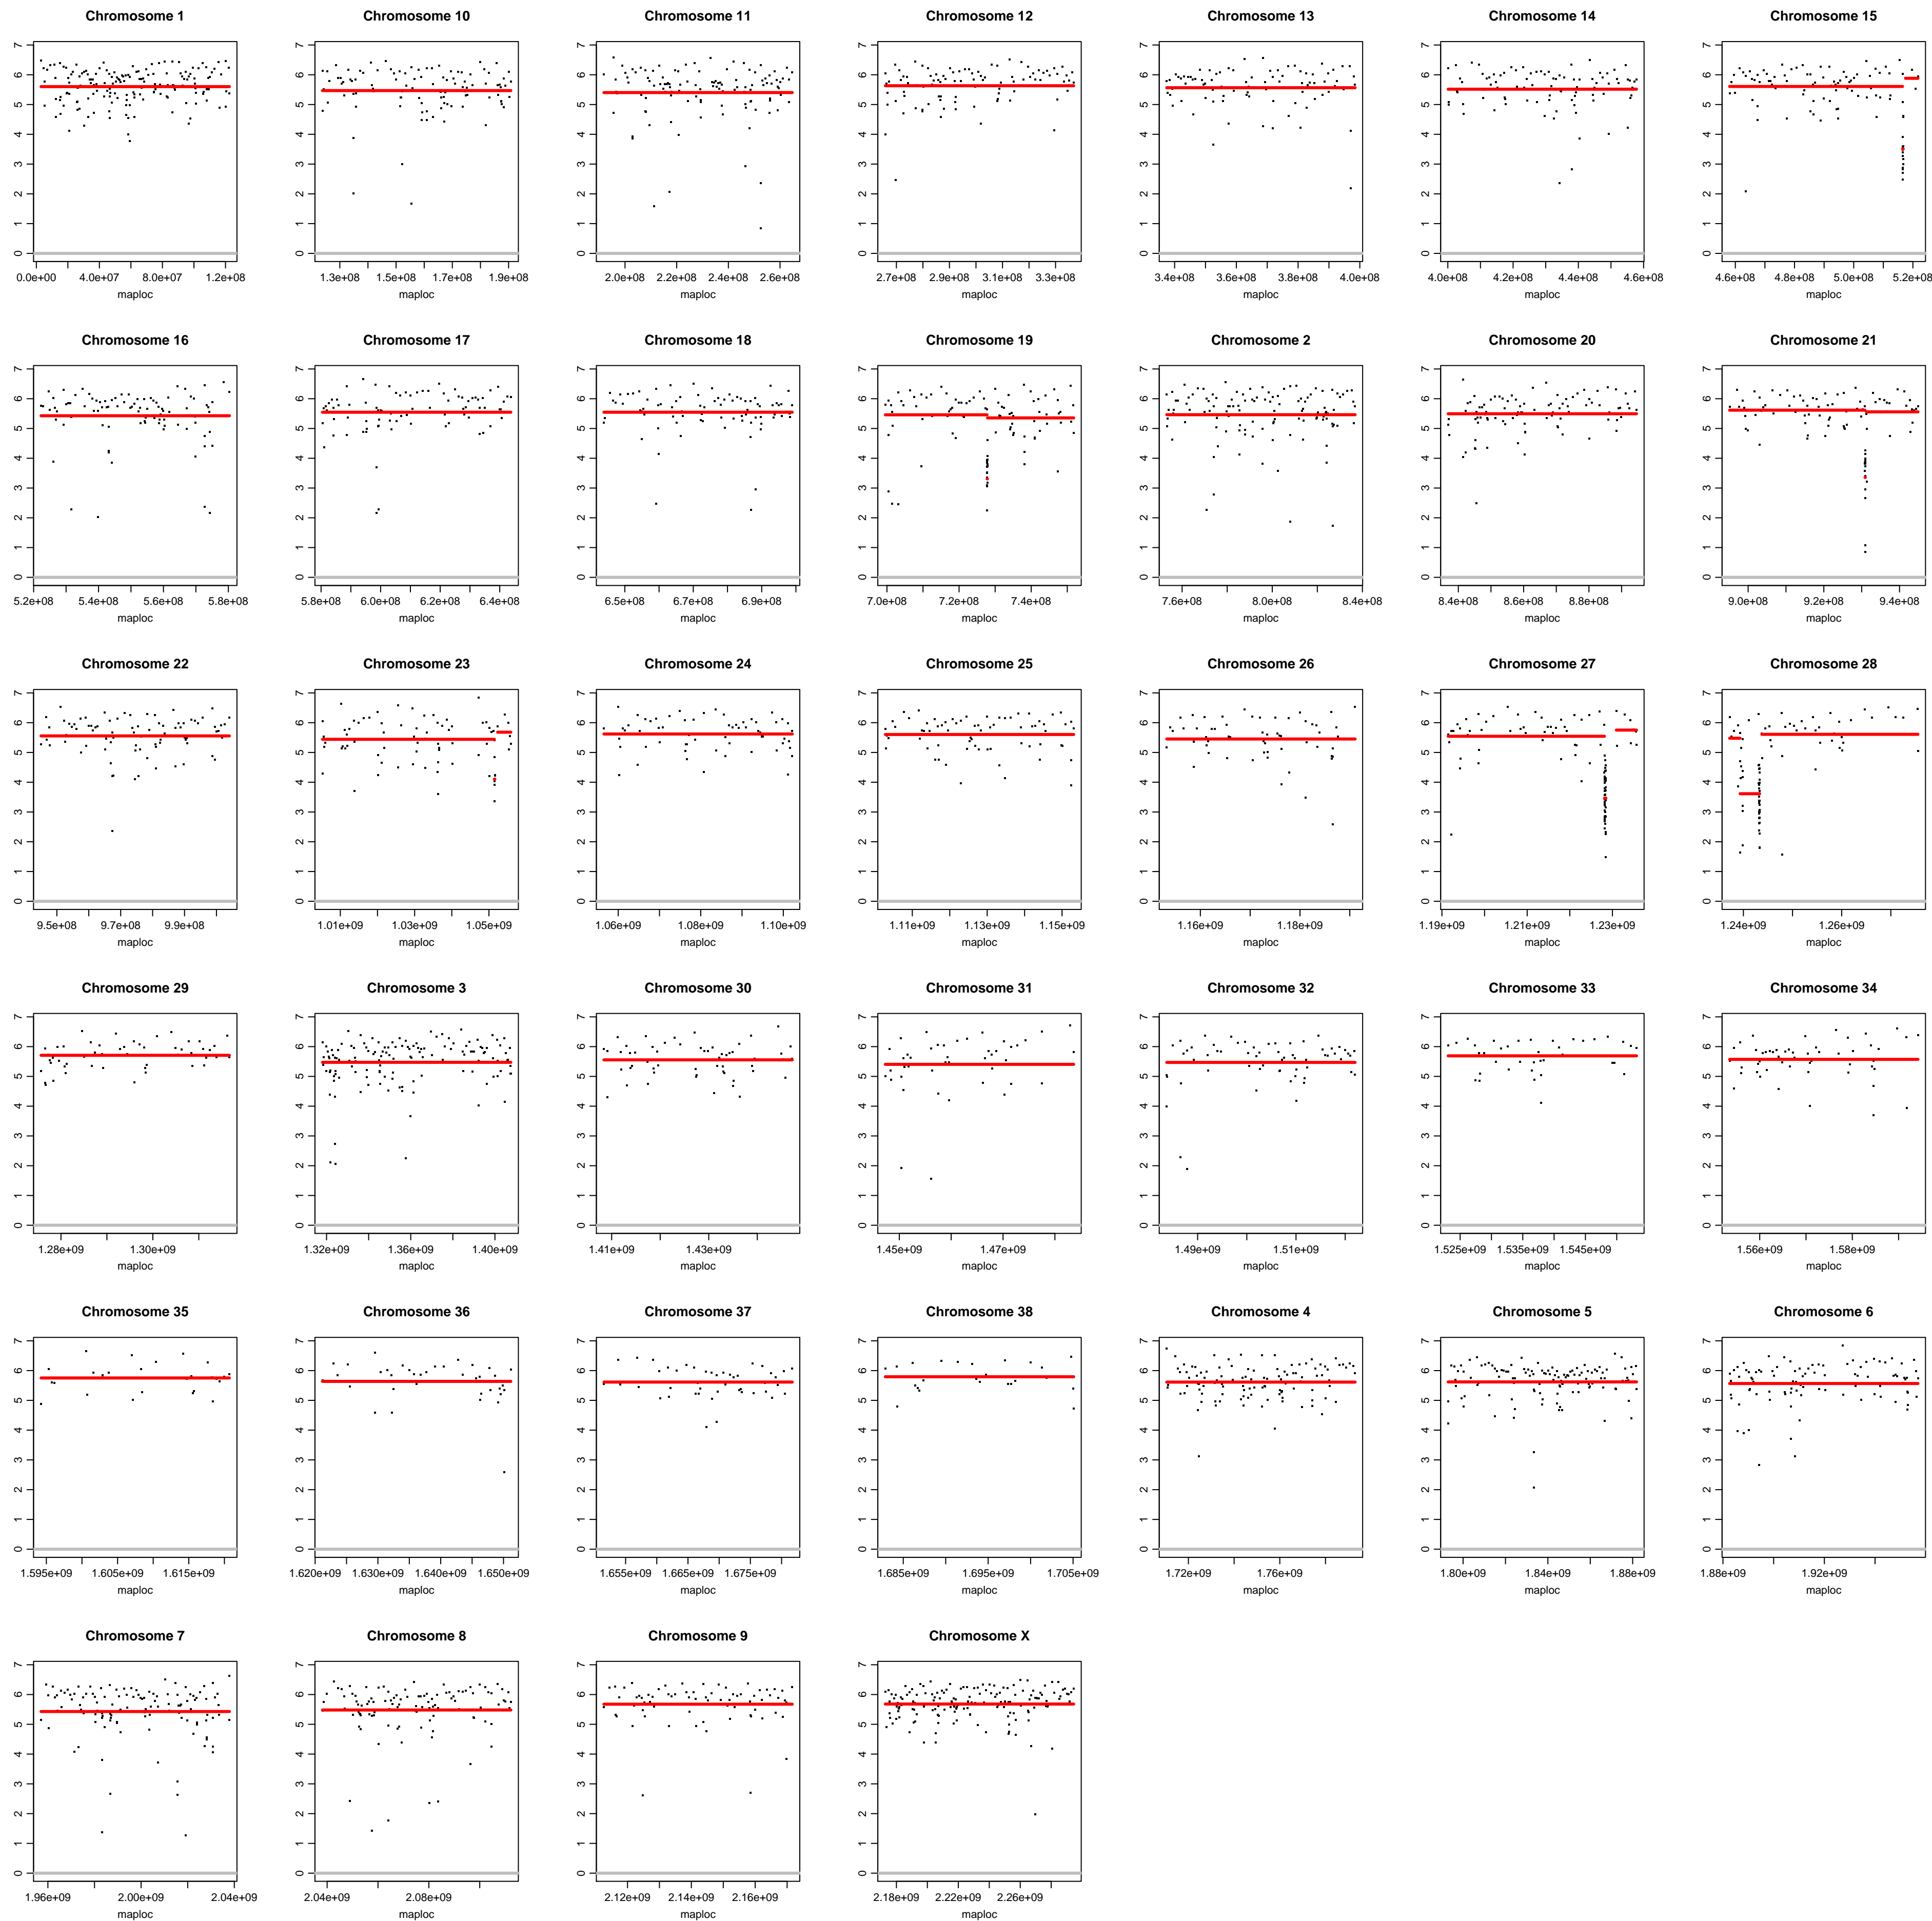

NPPB8\_dist.CanFam3

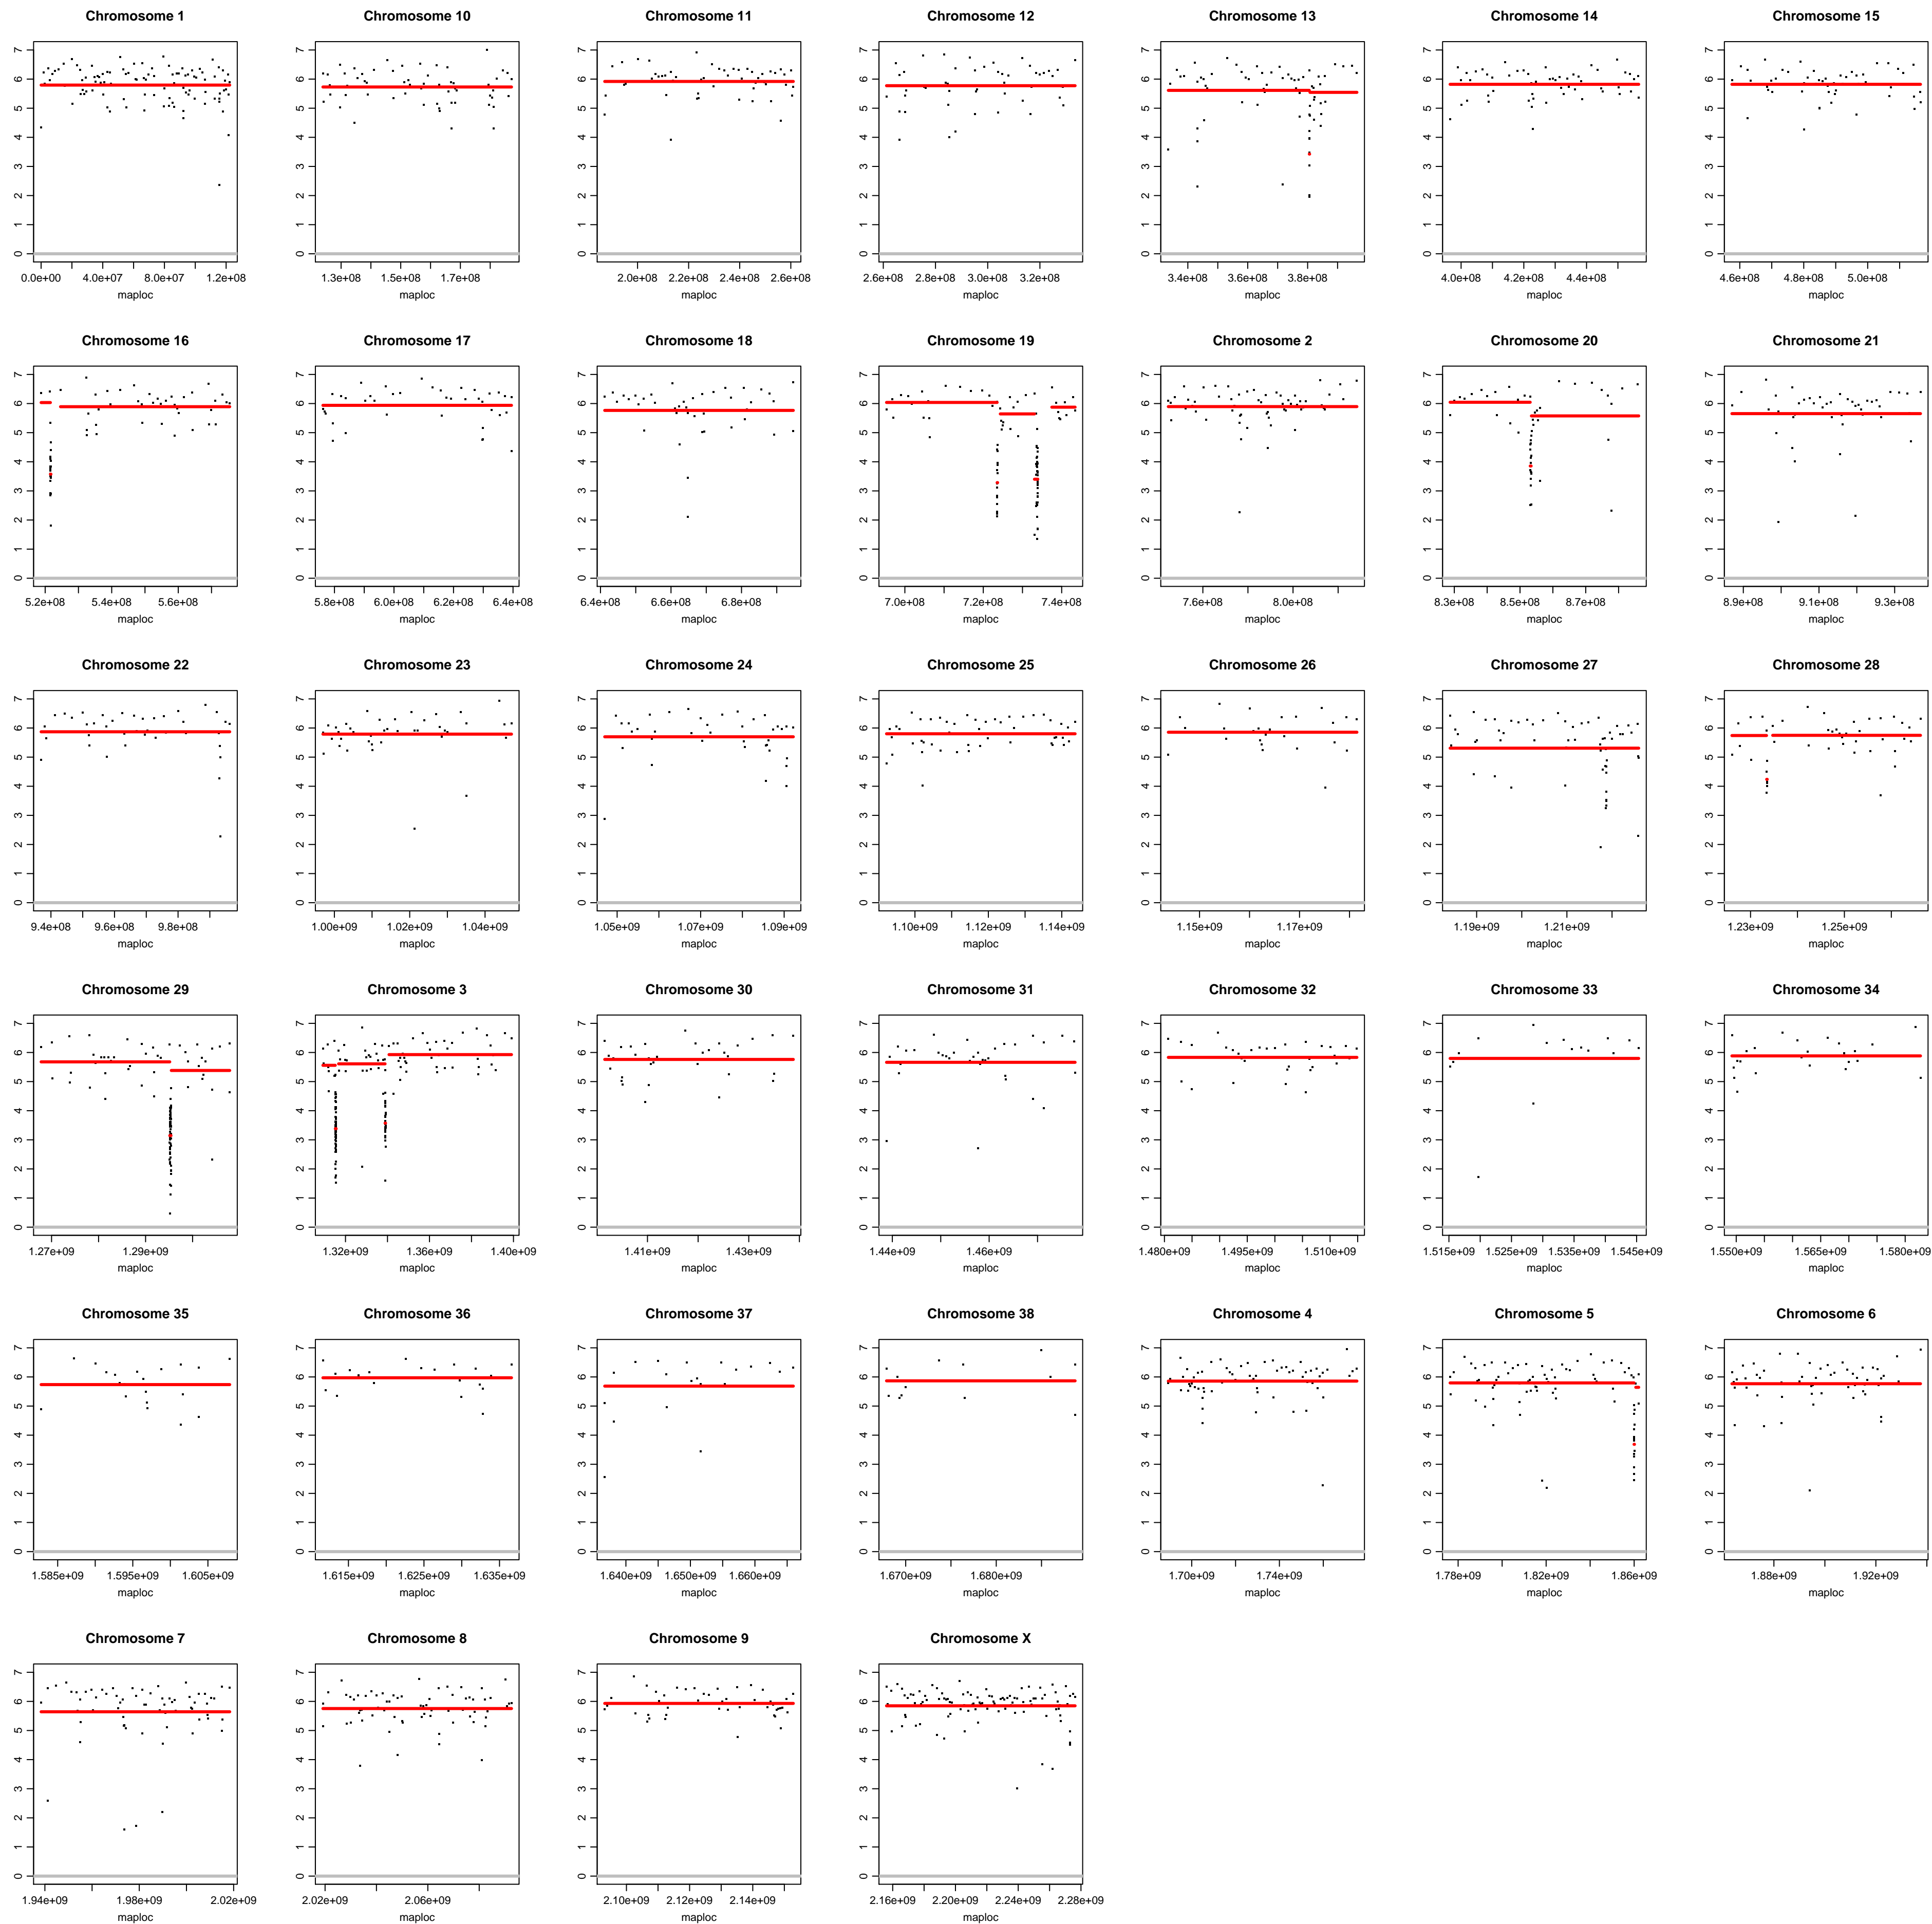

CPYB1.Bos\_taurus

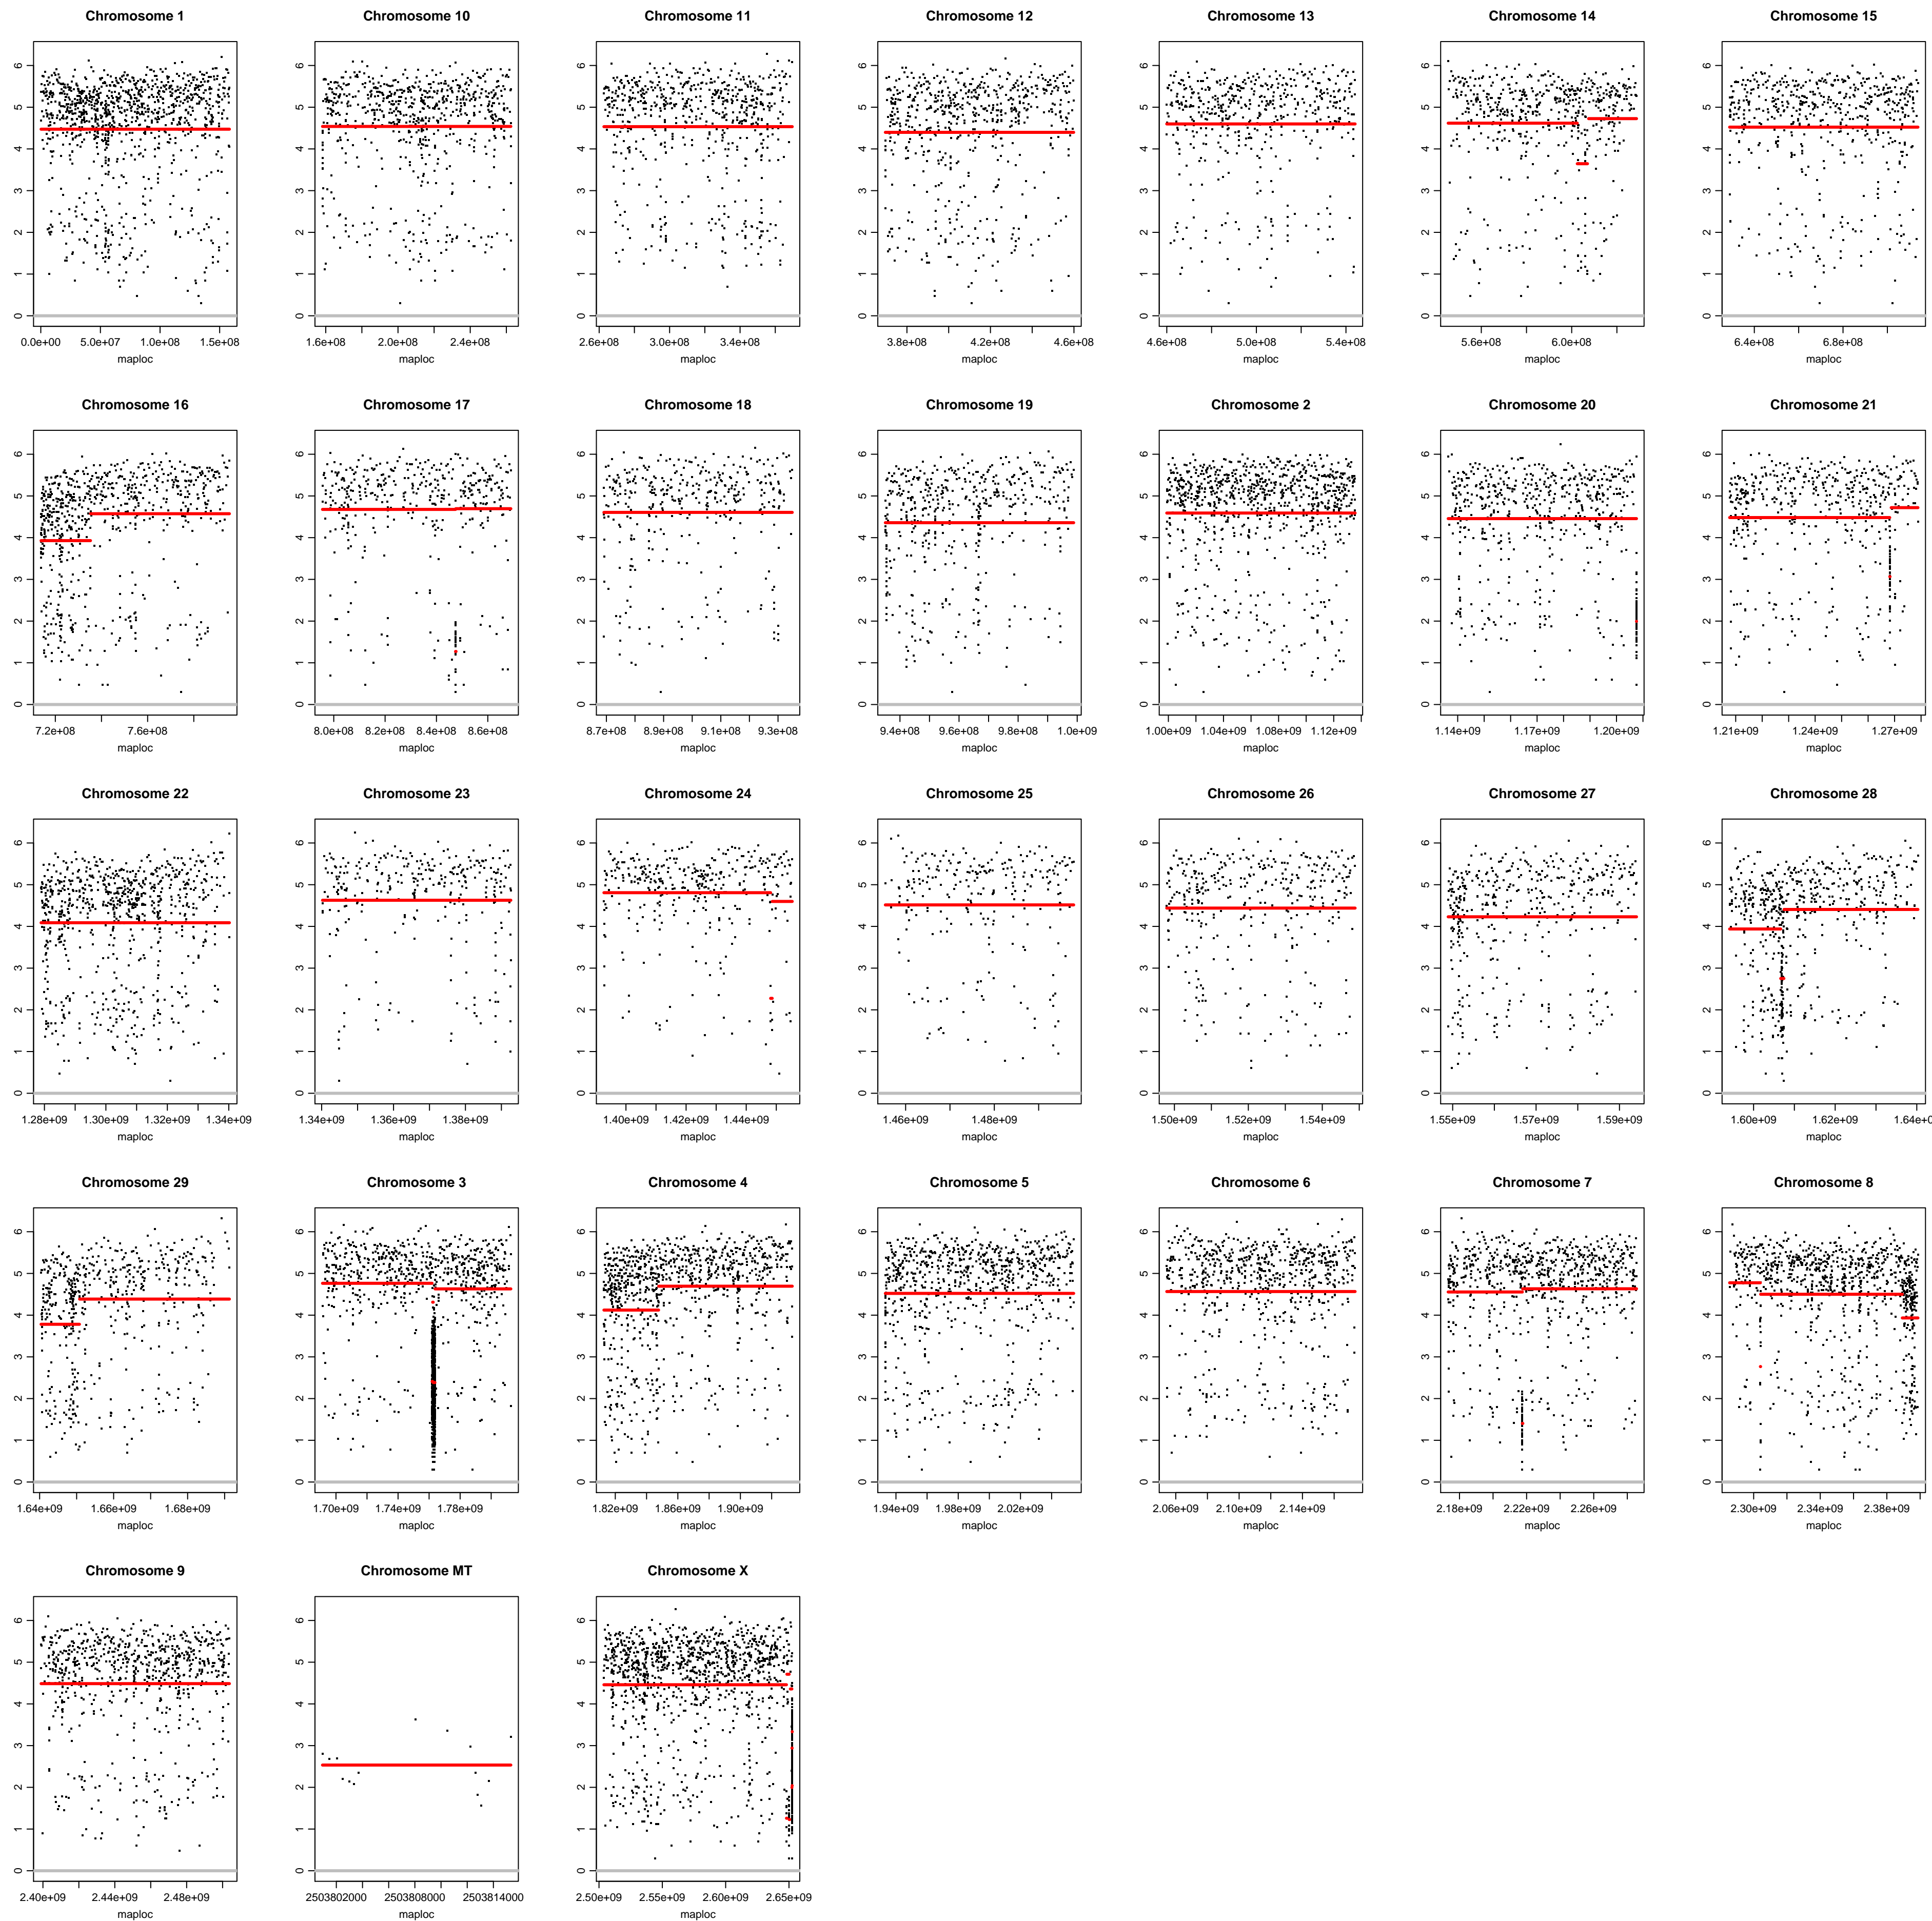

## CPYB2.Bos\_taurus

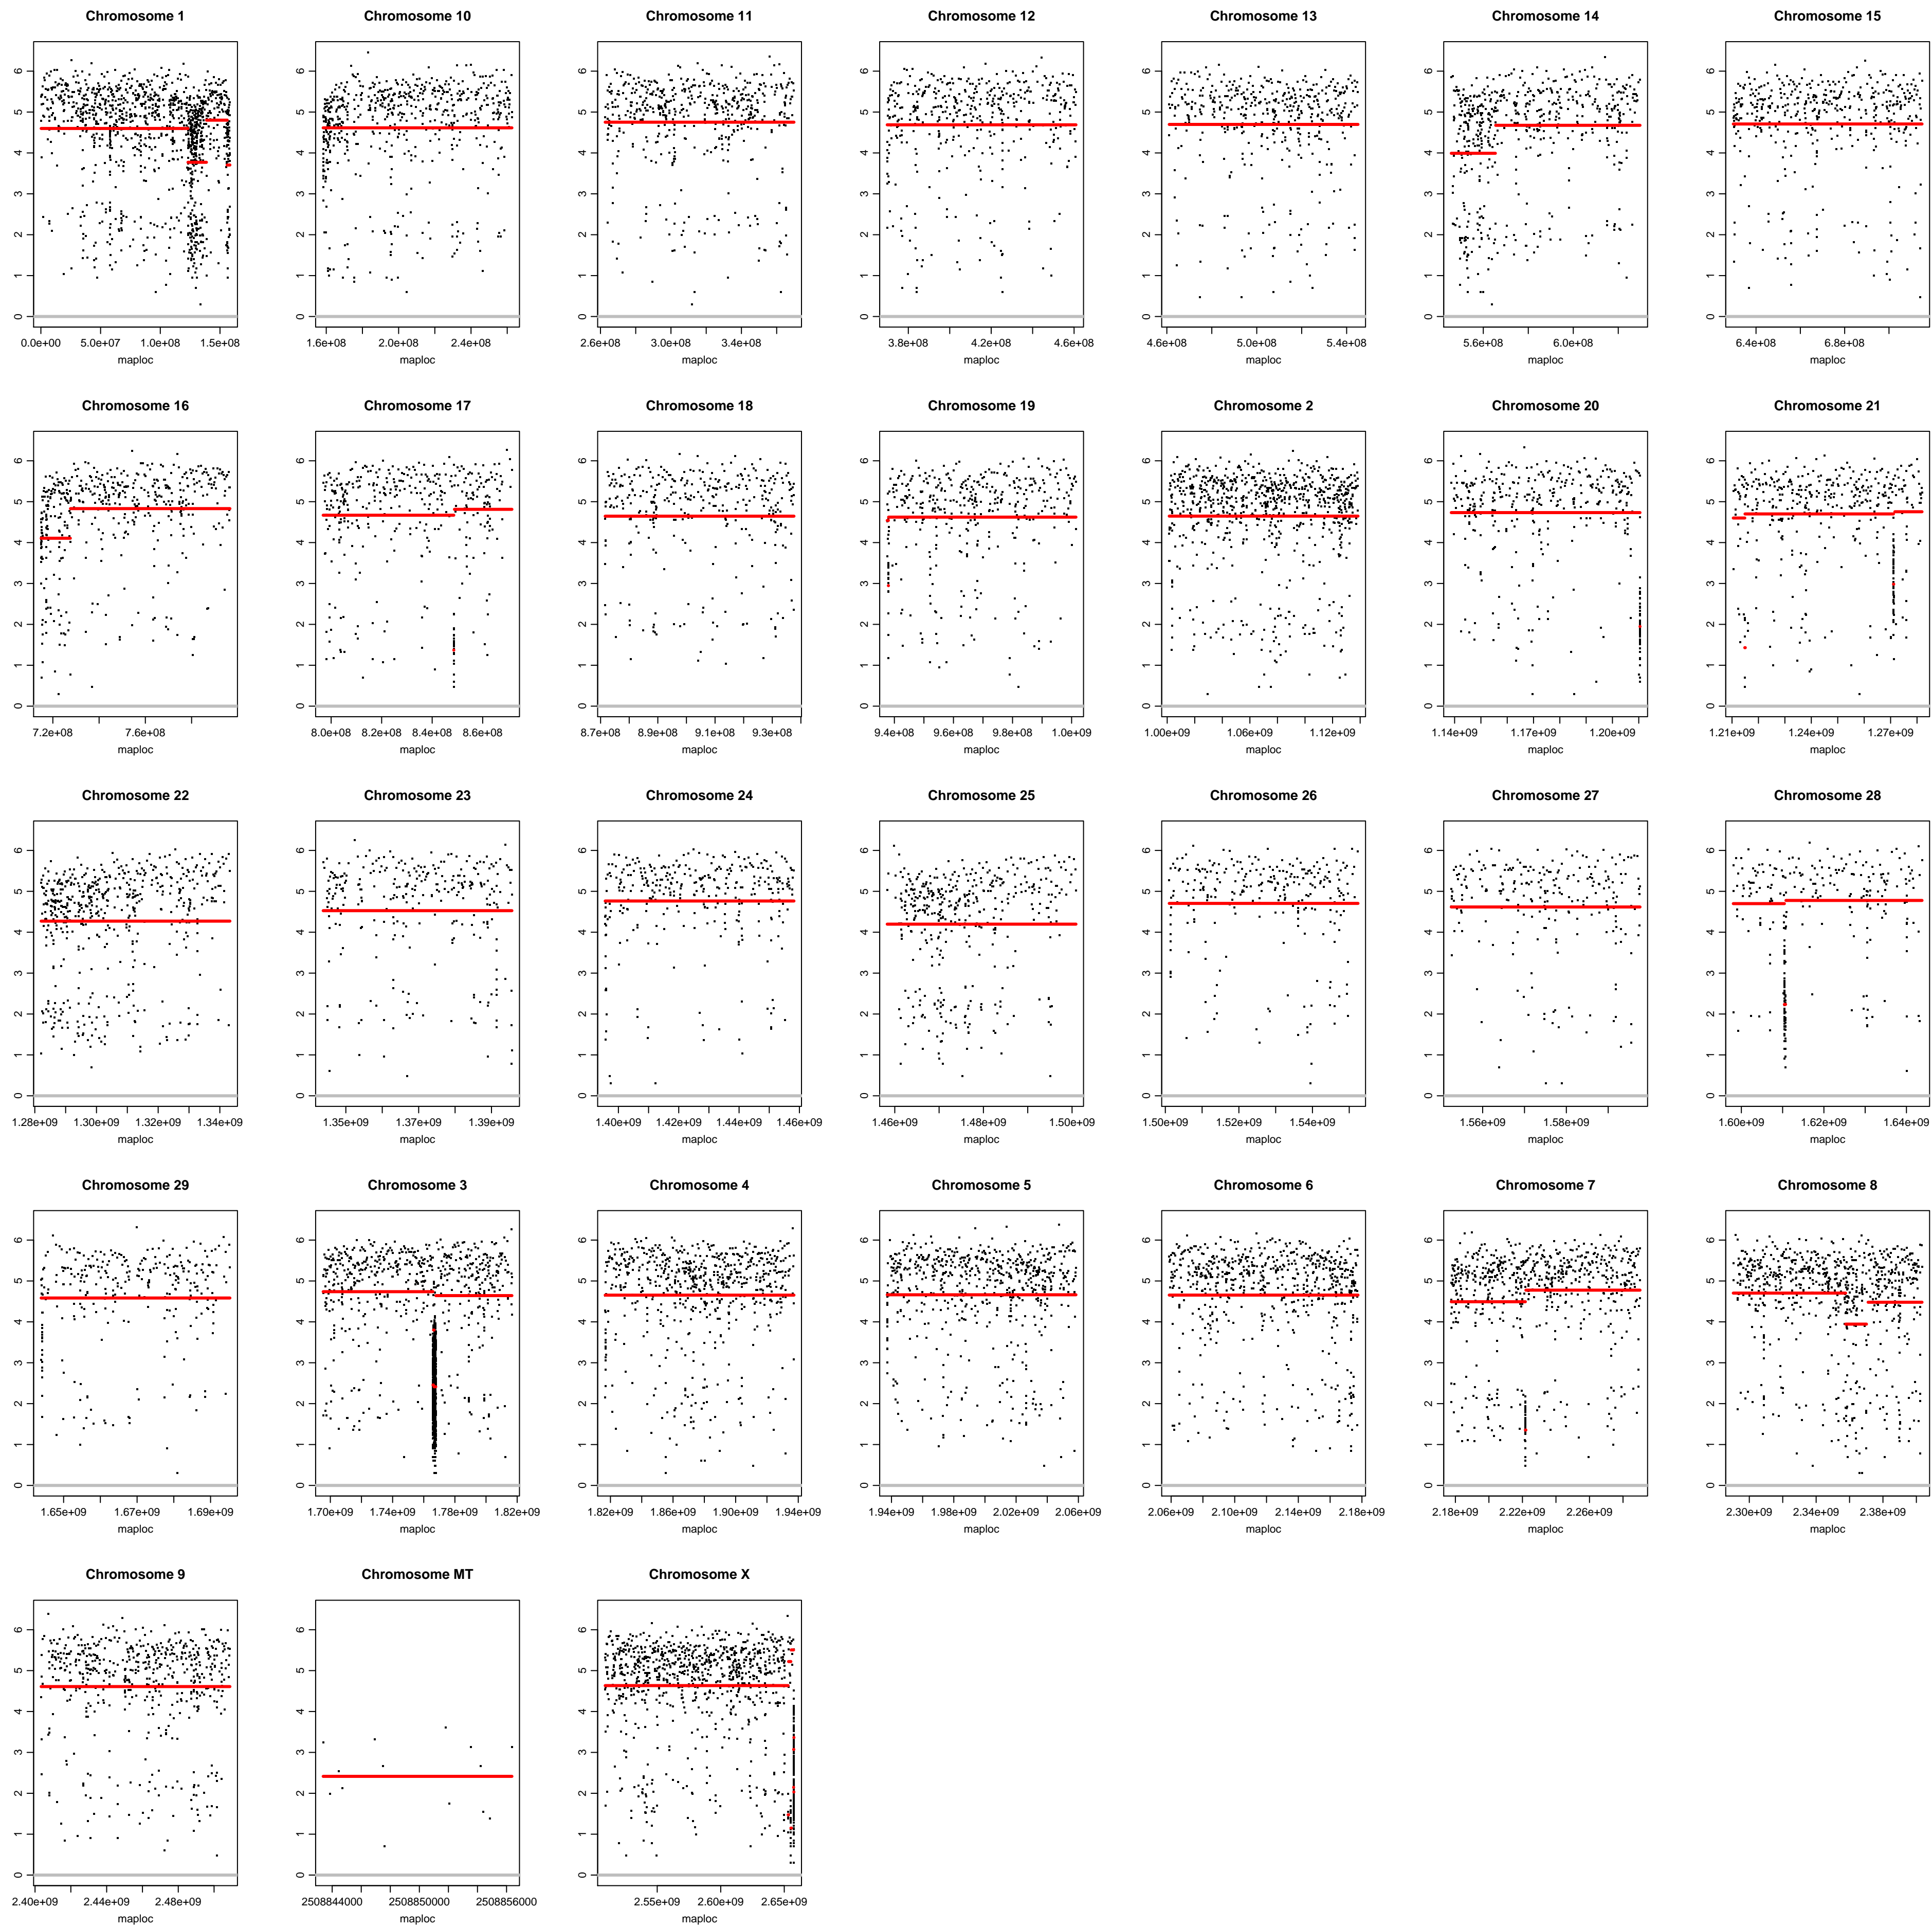



MGOB.Bos\_taurus

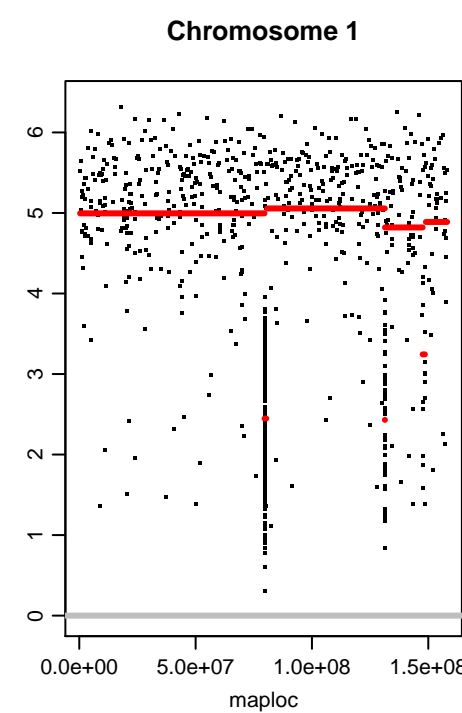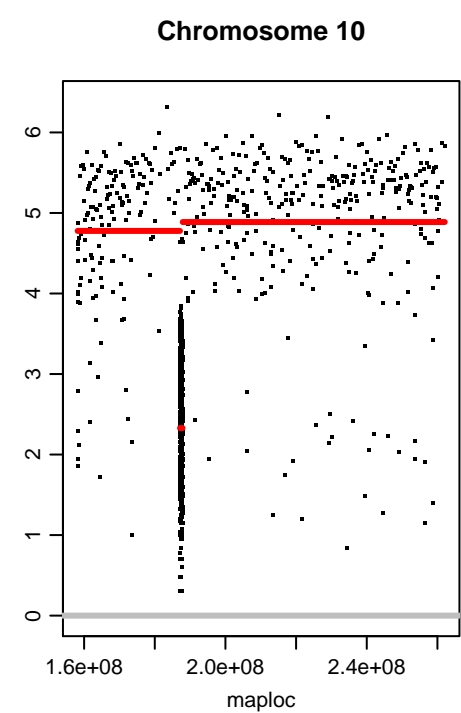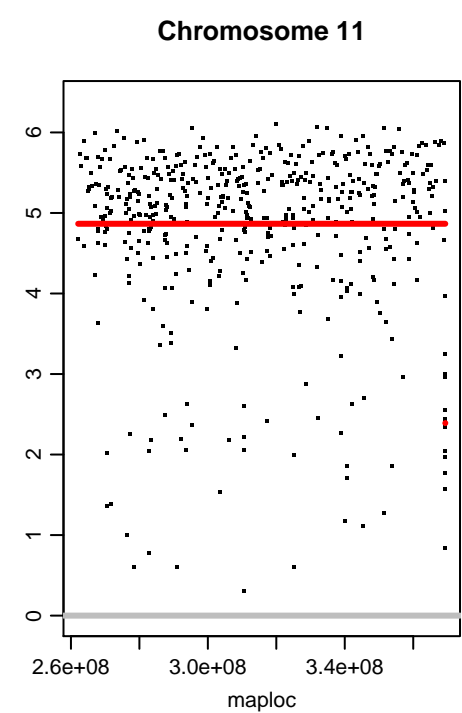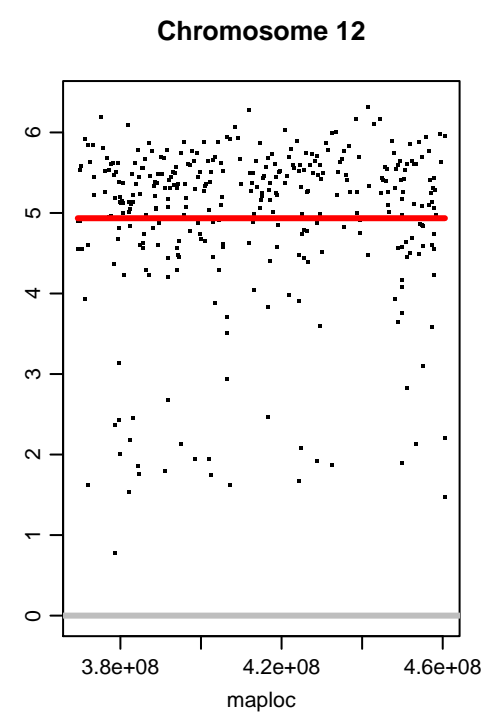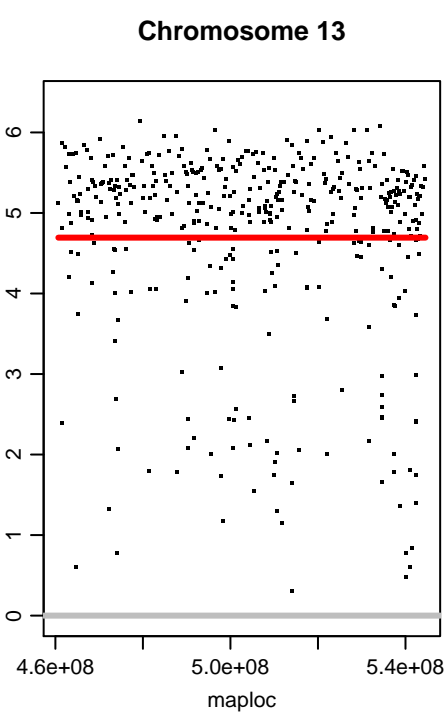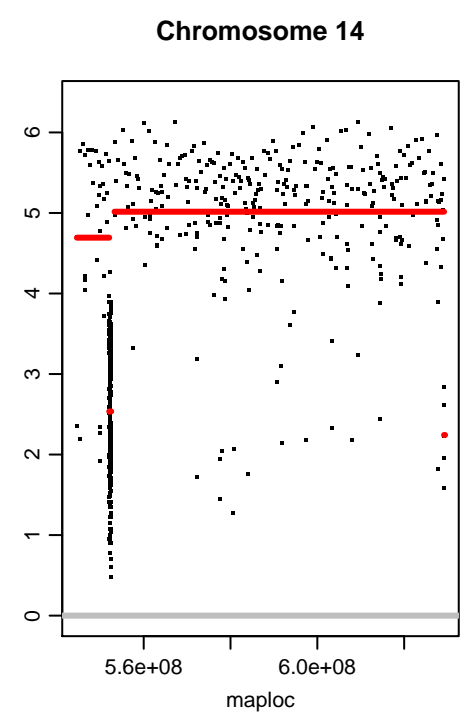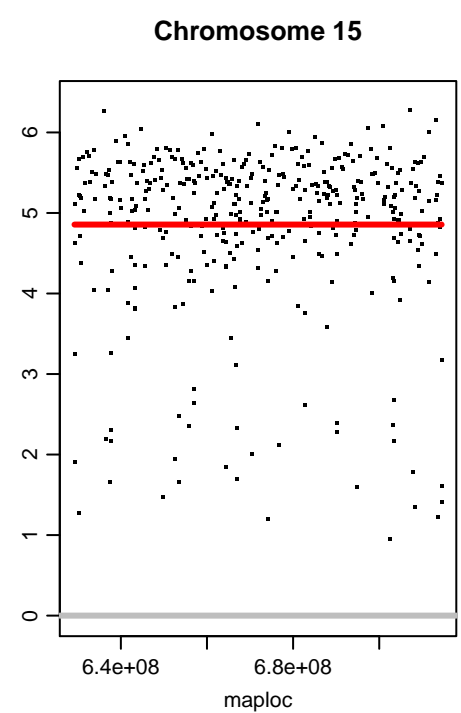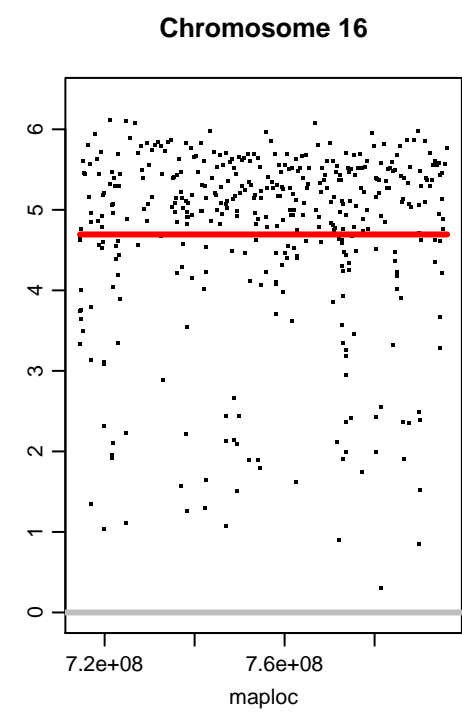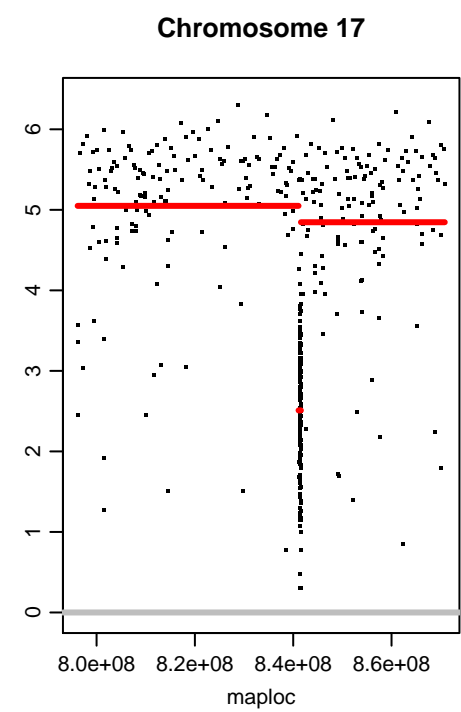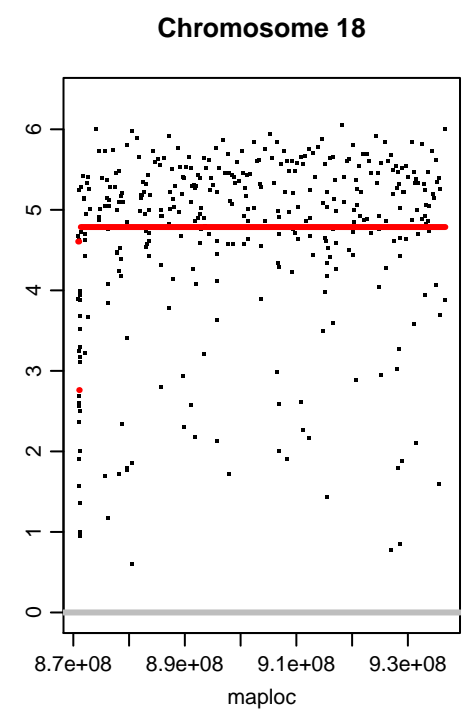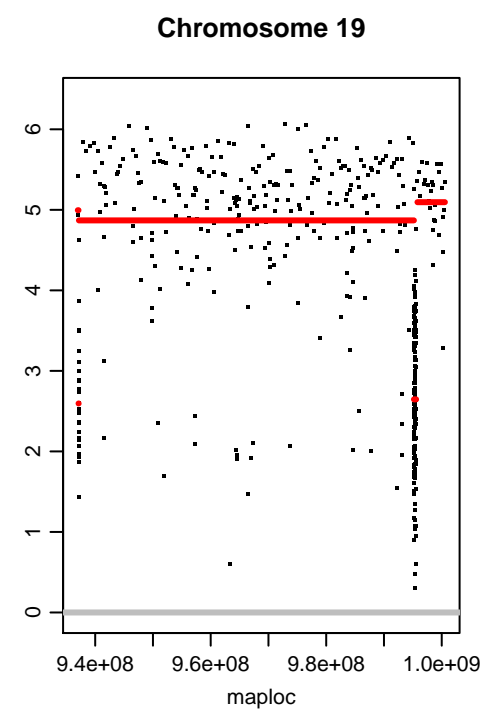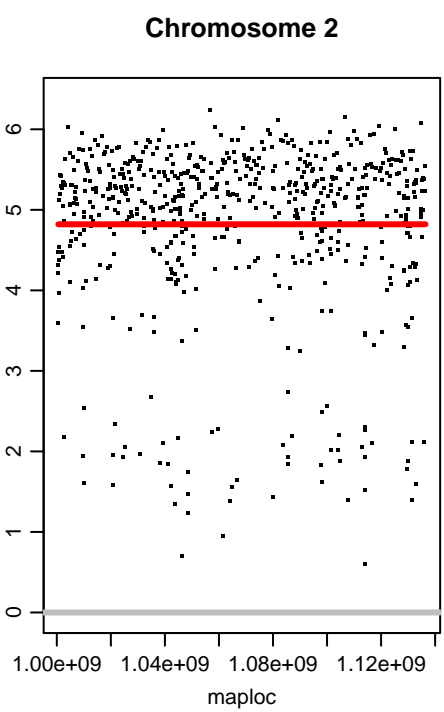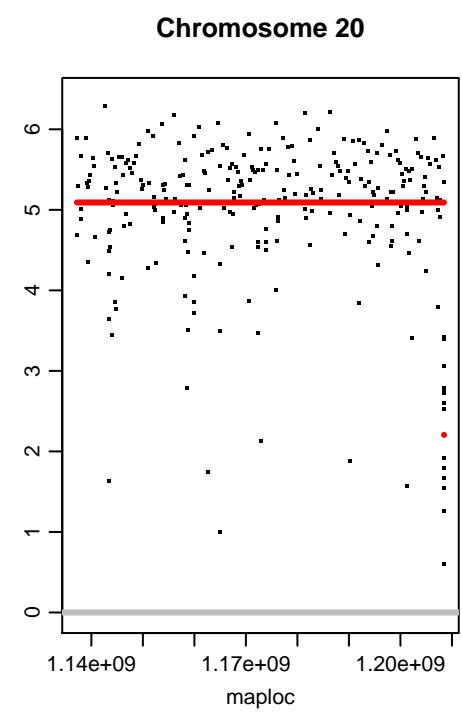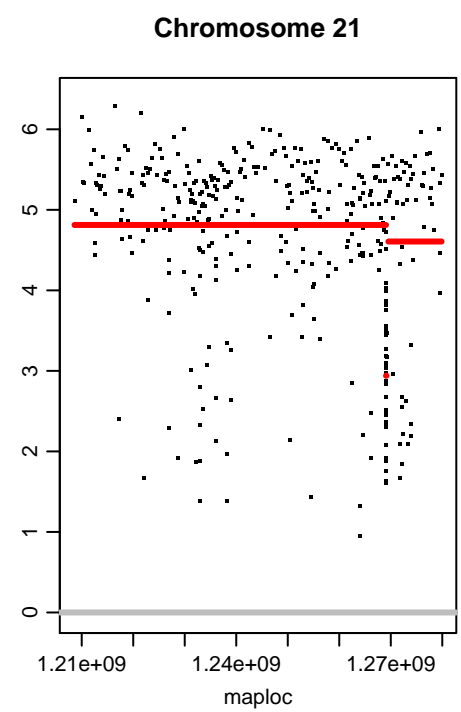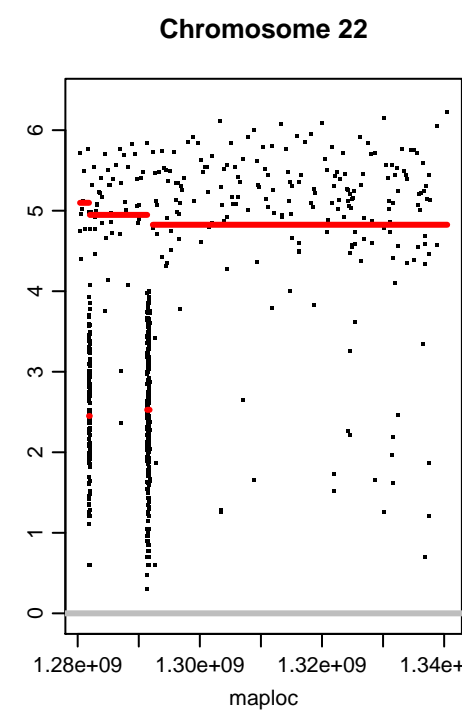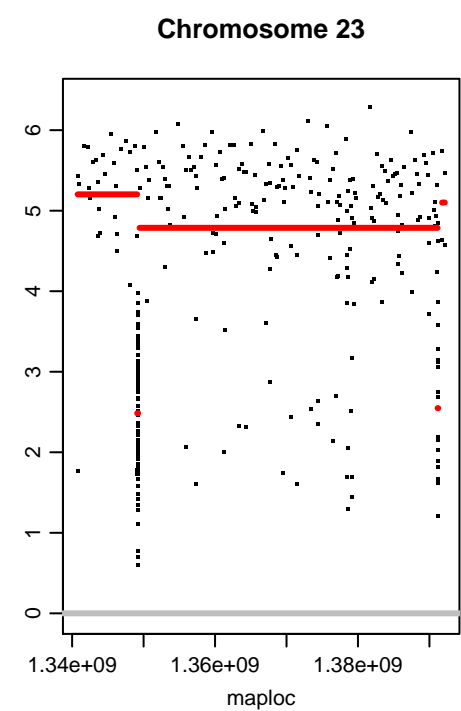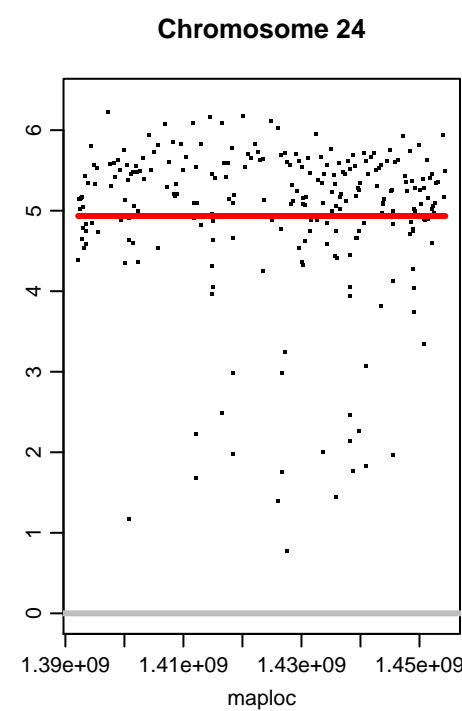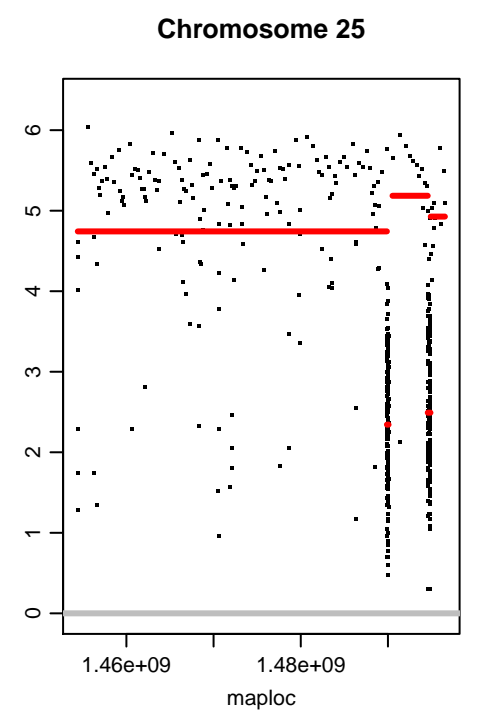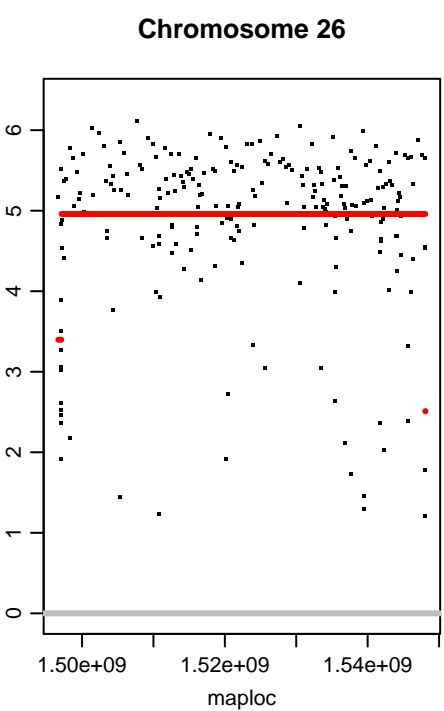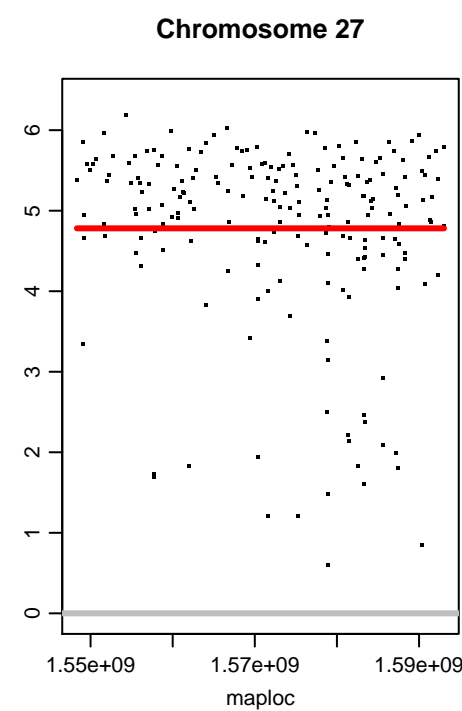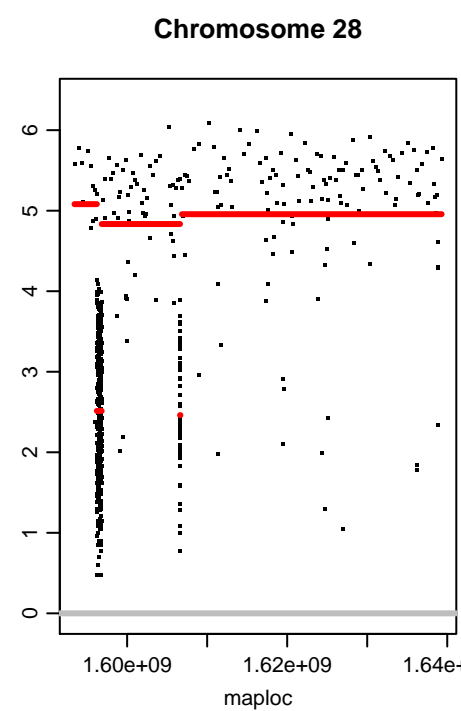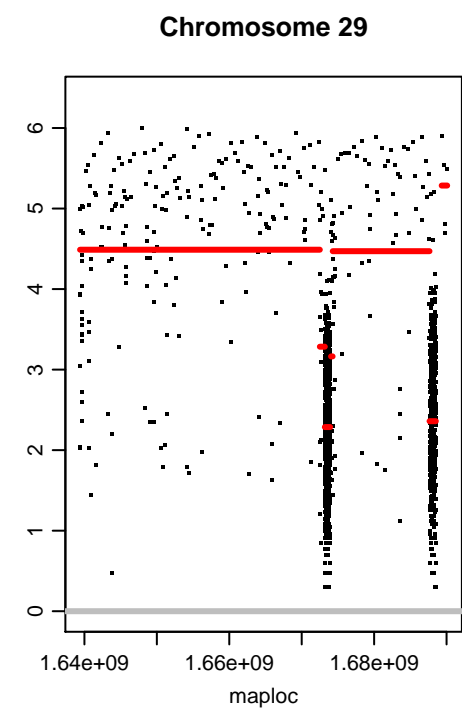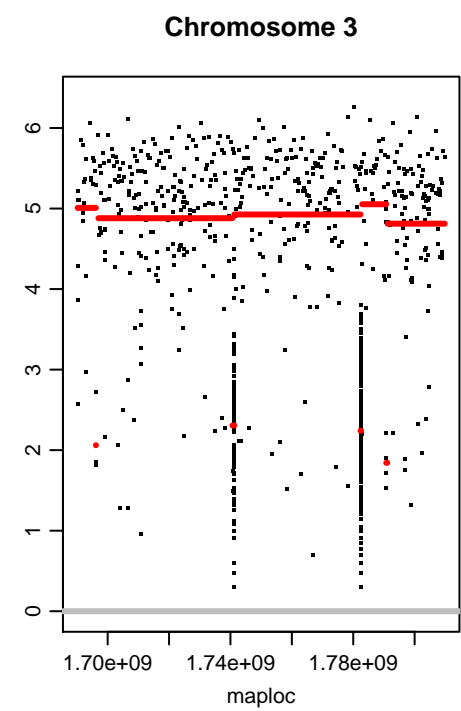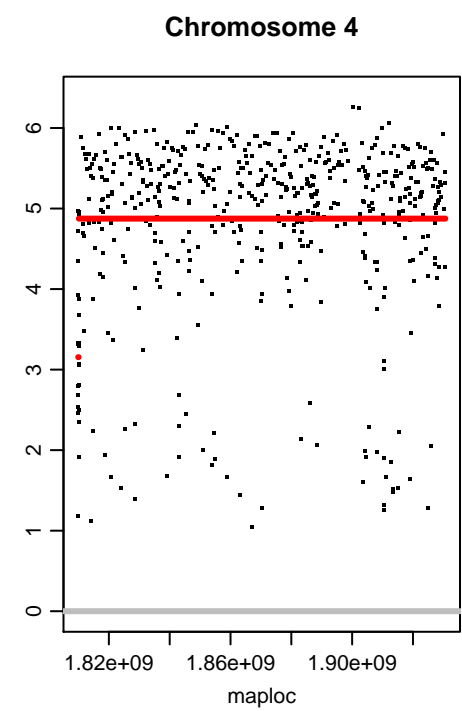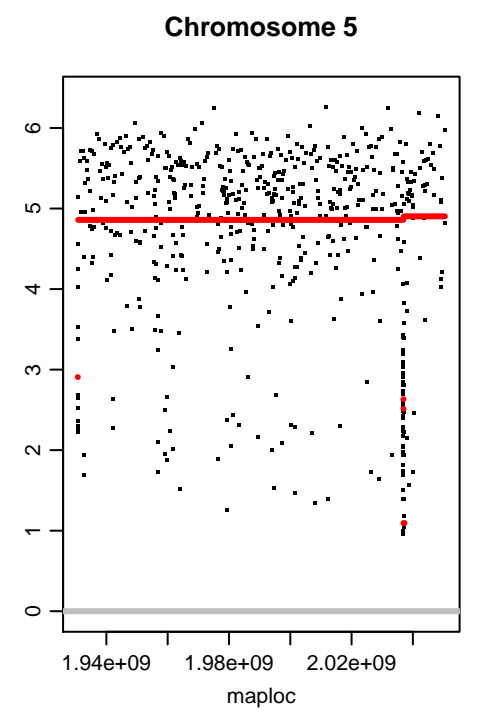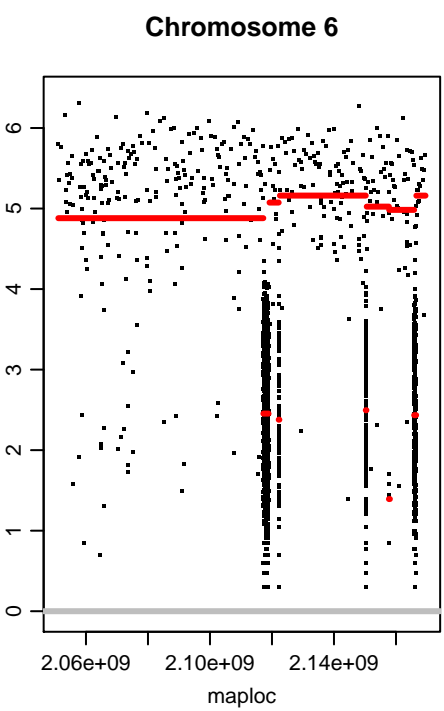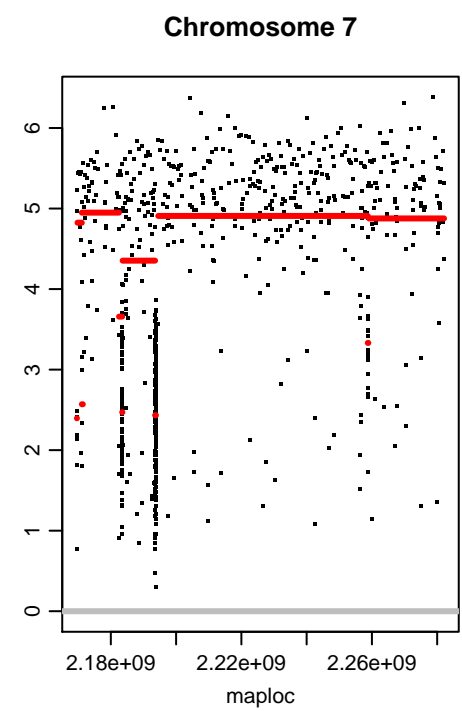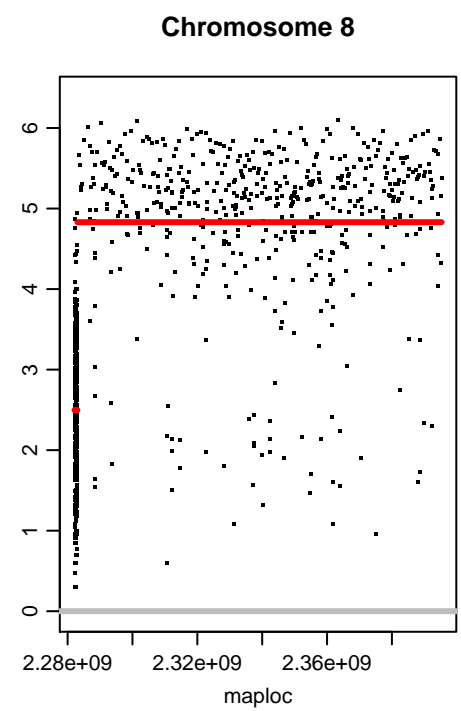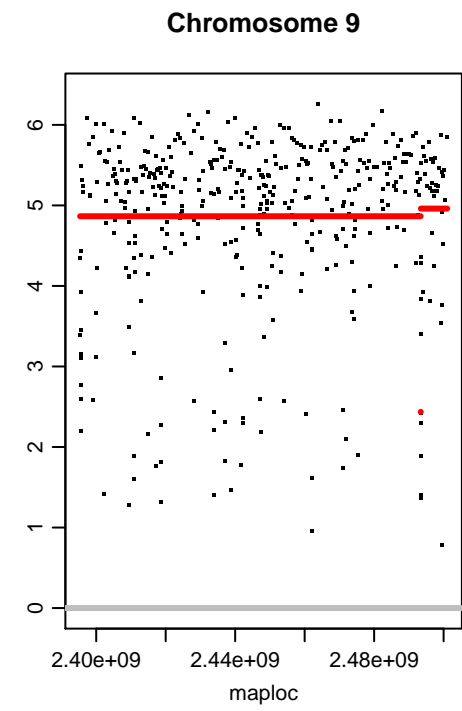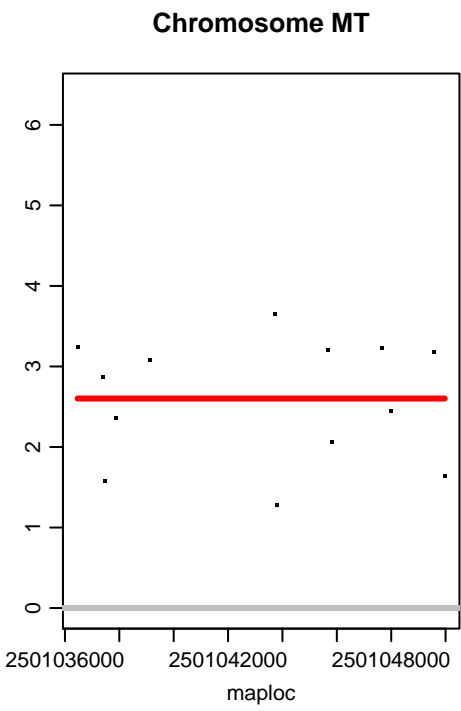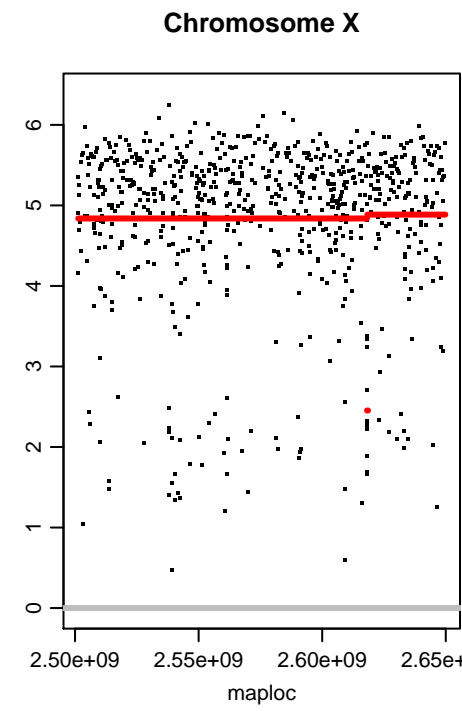

Supplement: s1 [file s1]
